# Supplementary material for: Assessment of HPV screening modalities within primary care: a systematic review
Source: Front Med (Lausanne). 2025 Apr 9;12:1567509. doi: 10.3389/fmed.2025.1567509 (PMC12014435; doi:10.3389/fmed.2025.1567509)
Supplement: Supplementary file 1 [file Table_1.xlsx]

## Sheet: Updated Data Extraction Table
	Study Characteristics					Population Characteristics						Screening Method Details		Primary Outcome						Secondary Outcomes			Additional information
Study ID	First Author	Title	Year of publication	Country of Publication	Study Design	Sample Size	Age Range of Participants	Inclusion Criteria	Exclusion Criteria	Demographic Information	HPV Vaccination Status	Type of Self-Sampling Method	Type of Pap Smear	Detection rate of HPV in self-sampling group	Detection rate of HPV in pap smear group	Comparative statistics	Statistical significance of findings	Sensitivity and specificity of self-sampling versus Pap smear	Positive Predictive Value (PPV) and Negative Predictive Value (NPV)	Patient satisfaction and acceptability	Cost effectiveness	Time to result	General Conclusions	Additional comments	CASP	Cohcrane ROB
1	Marc Arbyn	Accuracy and effectiveness of HPV mRNA testing in cervical cancer screening: a systematic review and meta-analysis	2022	Europe (doesn't mention a specific country)	Systematic review and Meta analysis	8 Studies	Not mentioned	Studies published before august 2021, "Eligible studies had to contain comparative data addressing one of our three clinical questions."	Not specified	Not specified	Not mentioned	hrHPV mRNA testing with the APTIMA HPV Test (APTIMA	DNA assays	In some of the included studies: "APTIMA was similarly sensitive (relative sensitivity 0·98 [95% CI 0·95-1·01]) and slightly more specific (1·03 [1·02-1·04]) for CIN2+. The relative sensitivity for CIN3+ was 0·98 (95% CI 0·95-1·01)." . In other included studies: "In self-collected samples, APTIMA was less sensitive for CIN2+ (relative cross-sectional sensitivity 0·84 [0·74-0·96]) but similarly sp…	indirectly mentioned alongside the self sampling group, if given access the full article it might specifically mention it.	Not mentioned	P-values werent mentioned, however CI was used. Moreover, QUADAS and ROBINS-1 tools were used to assess the quality of diagnostic test accuracy studies and cohort studies.	Some of the included studies illustrated that self sampling was similar in sensitivity and slighlt more sensitive. Other studies illustrated that self sampling was less sensitive and similar in specificity	Not mentioned	Not mentioned	Not mentioned	...	"APTIMA could be accepted for primary cervical cancer screening on clinician-collected cervical samples at intervals of around 5 years. APTIMA is less sensitive on self-collected samples than clinician-collected samples.". Have to look more into what 'APTIMA' is before using this review.
2	Marc Arbyn	Detecting cervical precancer and reaching underscreened women by using HPV testing on self samples: updated meta-analyses.	2018	Not mentioned	Meta analysis	56 diagnostic test accuracy studies and 25 randomized trials.	Not mentioned	Studies that compared Self sample vs Clinician sample. A Minimum of 400 women in the study. There is alot more info in the "Criteria for study selection" section	Not specified	Not specified	Not mentioned	devices used: Brush, Swab, Lavaget, Tampon	not explicitely mentioned	not mentioned	not mentioned	the risk of bias was never assessed as high	Not really mentioned	Figure 1 shows that in screening studies, the pooled sensitivity of hrHPV assays for CIN2+ was substantially lower in self samples (77%) than in clinician samples (93%). The pooled specificity to exclude CIN2+ was 84% in self samples and 86% in clinician samples.	table 1 for ppv but npv not mentioned	"Table 4 and supplementary figure 12 show that, on average, 0.7% of self samples were unsatisfactory for hrHPV testing." The following is about the participation rate which in a sense is sort of acceptability: "Table 3 and supplementary figure 11 show that, on average, the relative participation rate was 1.87 times and 2.33 times higher in the self sampling arm versus the control arm of the trial…	Not mentioned	...	When used with hrHPV assays based on polymerase chain reaction, testing on self samples was similarly accurate as on clinician samples. Offering self sampling kits generally is more effective in reaching underscreened women than sending invitations.		CASP General SR checklist 1. clearly formulated research question: Y 2. appropriate study designs: Y 3. important, relevant primary research studies included: Y 4. validity of the primary research studies assessed: Y 5. individual primary research studies information extracted appropriately: Y 6. results of individual primary research studies analysed appropriately: Y 7. limitations reported: Y 8…
3	Marianna Martinelli	Performance of BD Onclarity HPV assay on FLOQSwabs vaginal self-samples.	2024	Italy	Cross-sectional study	300 women	Median age of the study participants was 40 [range 25–64]	not explicitly mentioend, but it should be along the lines of women with a recent history of abnormal cervical cytology	Exclusion criteria include (i) women younger than 25 years, (ii) older than 64 years, (iii) hysterectomized women, and (iv) women with known pregnancy.	not specified	Not mentioned	the Evalyn Brush and FLOQSwab samples	Cervex-Brush (Rovers Medical Devices, The Netherlands)	not mentioned	not mentioned	not mentioned	Not really mentioned	No significant difference was observed in the relative sensitivity and specificity between vaginal samples tested with the two platforms. "First vaginal self sample sensitivity: 89.2%. Second vaginal self sample sensitivity: 90.2%. Moreover, clinical sensitivity for CIN2 on self-collected samples using BD Viper LT or BD COR compared to paired LBC sample was 1.01, 1.01, and 1.00, respectively."	Not mentioned	Not mentioned	not mentioned	not explicitly mentioned	hrHPV testing using BD Onclarity HPV assay on vaginal self-collected FLOQSwab 5E089N using two different analysis platforms, BD Viper LT and BD COR, has similar clinical sensitivity to detect ≥CIN2 compared to testing on clinician-taken cervical samples. However, lower clinical specificity was observed on the self-samples		Clear Focus: Y Acceptable Recruitment: Y Accurate measurement: Y Some confounders missing: Y Results- Precise and believable: Y Consistent with other evidence: Y Relevance- Applicable to local population: Y Implications for practice: Y
4	Claire Styffe	HPV Self-sampling in Indigenous Communities: A Scoping Review.	2020	usa, canada, australia, new zealand, south american indeginous people	systematic review	19 texts were incorporated in the article	18-73	Sources in English and French were included due to the research team’s linguistic capabilities. 1993 was chosen as the cut-of year as that was when the frst study on HPV self-sampling was published	Studies were excluded if they did not provide sufcient information to disaggregate data on Indigenous people. Gray literature was excluded if it was only in reference to previously included studies without providing supplementary information	indigenous women	Not mentioned	Not mentioned	Not Specified	not mentioned	not mentioned	Not mentioned	None mentioned	Higher sensitivity in self sampling	not mentioned	women identifed HPV self-sampling to be easy, convenient or comfortable. Closely related to this notion of ease and comfort, many resources reported that HPV self-sampling was seen as less embarrassing or painful than a Pap test	Not mentioned	systematic review, hence it isnt explicitly mentioned	Indigenous women have higher rates of cervical cancer and cervical cancer mortality compared to non-Indigenous women, as well as unique challenges to accessing screening services. Human papillomavirus (HPV) self-sampling has been demonstrated as an effective measure to reach under-screened women. HPV self-sampling is an appealing alternative as it allows for greater privacy, convenience and comfo…
5	Marianna Martinelli	Accuracy of Human Papillomavirus (HPV) Testing on Urine and Vaginal Self-Samples Compared to Clinician-Collected Cervical Sample in Women Referred to Colposcopy.	2023	Italy	Cohort study	245 women	The average age of the patients at the time of enrollment in the study was 38.6 years (range: 17–67 years)	not specified	not specified	not specified	Not mentioned	FLOQSwab	cytological diagnosis of cervical lesions	95.5% hrHPV positive	95.5% hrHPV positive	Not mentioned	None mentioned	Cervical and vaginal specimens were equally sensitive for CIN2+ detection (95.5%), vaginal samples were slightly inferior in terms of specificity	self sampling vs pap smear Calculations based off of hrHPV values from Table 4: PPV: 94.1%, NPV: 98.7%	Not mentioned	Not mentioned	4 years	These results confirmed that performing Anyplex™II HPV28 (Seegene, Seoul, Republic of Korea) on self-collected vaginal samples for the detection of hr-HPV in women with CIN2+ is comparable with that of clinician-taken cervical samples.		Clear Focus: Y Acceptable Recruitment: Y Accurate measurement: Y Some confounders missing: N Results- Precise and believable: Y Consistent with other evidence: Y Relevance- Applicable to local population: Y Implications for practice: Y
6	Marc Arbyn	HPV-based Cervical Cancer Screening on Self-samples in the Netherlands: Challenges to Reach Women and Test Performance Questions.	2023	Netherlands	Meta analysis	not mentioned	several different age ranges mentioned, but the combined age range is 25-69	not specified	not specified	The following population categories were more likely to self-sample than undergo clinician sampling: never screened women (29.0% vs. 11.9%, in the self-sampling and clinician-sampling groups, respectively, ratio = 2.43); the youngest ages 30–39 years (ratio = 1.29) and oldest group ages 60 years versus the middle age groups (ratio = 1.06); unemployed and supported by social welfare versus employe…	Not mentioned	Evalyn brush	Not Specified	HPV positivity and detection rate of precancer (CIN3+) were lower in the self-sampling compared with the clinician-sampling group (adjusted ORs of 0.65 and 0.86, respectively)	as mentioned in the field to the left	Ratios and OR mentioned. "The following population categories were more likely to self-sample than undergo clinician sampling: never screened women (29.0% vs. 11.9%, in the self-sampling and clinician-sampling groups, respectively, ratio = 2.43); the youngest ages 30–39 years (ratio = 1.29) and oldest group ages 60 years versus the middle age groups (ratio = 1.06); unemployed and supported by soc…	None mentioned	Self sampling lower sensitivity and higher specificty compared to clinician samples	Higher PPV	"The following population categories were more likely to self-sample than undergo clinician sampling: never screened women (29.0% vs. 11.9%, in the self-sampling and clinician-sampling groups, respectively, ratio = 2.43); the youngest ages 30–39 years (ratio = 1.29) and oldest group ages 60 years versus the middle age groups (ratio = 1.06); unemployed and supported by social welfare versus employ…	Not mentioned	Not explicitly mentioned	the screening program in the Netherlands has nicely demonstrated that the offer of self-sample kits can reach more women never screened before. Careful monitoring allowed for adjusting the way the self-kits are offered and resulted in higher acceptance rates. This article doesnt focus on detection/accuracy it focuses more on the aspect of how many people opted to use self sampling and the challen…
7	Noely P. C. Lorenzi	A positive HPV test with positive p16/Ki-67 double staining in self-sampled vaginal material is an accurate tool to detect women at risk for cervical cancer.	2021	...	Cross-sectional study	232 women		Participants were referred for colposcopy on account of the presence of the following cytological changes on the basis of the 2014 Bethesda system	Women younger than 21 years, pregnant women, completely hysterectomized women, and those unwilling to participate in the research protocol were excluded.	The sociodemographic and reproductive characteristics of the women overall were as follows: median age of 36 years (interquartile range [IQR], 29-43 years), onset of menstruation at 13 years (IQR, 12-14 years), menopause at 50 years (IQR, 47-52 years), first sexual intercourse at 16 years (IQR, 16-18 years), 2 pregnancies (IQR, 1-3), 1 delivery (IQR, 0-2), and 4 sexual partners (IQR, 3-7).	Not mentioned	Evalyn Brush	liquid-based cytology (LBC), HR-HPV testing, and testing with the biomarkers p16/Ki-67, α-mannosidase, and SOD2	Doesn't mention explicitly mention Detection rate	Doesn't mention explicitly mention Detection rate	Not provided in the text	Strong significance: in the HP group (P < .001) and in the SC group (P < .001)	Self sampling Sensitivity: 94.1%, Specificity: 31.0%. Pap smear: Sensitivity: 93.75%, Specifity 31.1%	The positive predictive values (HP, 76.5%; SC, 80.0%), the negative predictive values (HP, 66.7%; SC, 64.3%)	not mentioned	not mentioned	...	The tests for HPV detection using SC samples and samples collected by HPs showed similar sensitivity and specificity for diagnosing CIN2+, and this validated the great potential of SC samples in clinical practice.		Clear Focus: Y Acceptable Recruitment: Y Accurate measurement: Y Some confounders missing: N Results- Precise and believable: Y Consistent with other evidence: Y Relevance- Applicable to local population: Y Implications for practice: Y
8	Alex Mremi	Performance of HPV testing, Pap smear and VIA in women attending cervical cancer screening in Kilimanjaro region, Northern Tanzania: a cross-sectional study nested in a cohort.	2022	Kilimanjaro region, Tanzania	A combined cross-sectional and cohort study.	1620 women	25-60	inclusion criteria were being aged 25–60 years, and no history of premalignant or cervical cancer.		Not specified	Not mentioned	Evalyn Brush and Care HPV kit assay	Not specified	Doesn't mention explicitly mention Detection rate	Doesn't mention explicitly mention Detection rate	Not mentioned	Not really mentioned	Self sampling Sensitivity: 62.5%, Specificity: 59.3%. Pap smear: Sensitivity: 82.8%, Specifity 82.1%. When combined, the sensitivity and specificity for HPV and Pap smear were 90.6%, 70.6%	The PPV and NPV of various screening tests individually were: HPV 18%, 91.7%, Pap smear 39.8%, 97.1% respetively	not menioned	not mentioned	...	The performance of care HPV testing on self-collected samples opens the possibility of increasing coverage and early detection in resource-constrained settings.		Clear Focus: Y Acceptable Recruitment: Y Accurate measurement: Y Some confounders missing: Y Results- Precise and believable: Y Consistent with other evidence: Y Relevance- Applicable to local population: Y Implications for practice: Y
9	Xue-Lian Zhao	Cost-effectiveness of the screen-and-treat strategies using HPV test linked to thermal ablation for cervical cancer prevention in China: a modeling study.	2023	China	Modeling study	A designated initial cohort of 100,000 females born in 2015	Not specified, but the target population for screening was women aged 30-65 years	Women aged 30-65 years in urban and rural China	Not specified	Not specified in detail, but the study considered both urban and rural populations in China	Not considered due to negligible HPV vaccination coverage in China	Self-collected HPV test	Not specifically mentioned, but comparisons were made with physician-collected HPV tests with genotype or cytology triage	Not specified in discrete percentages in the study. However, it was implied through the cost-effectiveness and QALYs gained. Self-sampling strategies, particularly without triage, were highlighted as yielding the most cost savings and the highest incremental QALYs (420 QALYs).	Not directly specified in terms of rates	Used incremental cost-effectiveness ratios (ICERs) to compare different strategies. All screen-and-treat strategies, including self-sampling, were found to be cost-effective compared to the current strategies. The ICERs for self-HPV without triage ranged from -$3214.1 to $8900.2 per QALY gained.	The study did not provide p-values or confidence intervals for detection rates. Instead, it focused on the cost-effectiveness and health benefits, with self-HPV without triage being identified as the optimal strategy with the most significant cost savings and QALYs gained.	Provided in Table 2 - Too many results to include here	Not specifically mentioned	Not specifically mentioned	Self-HPV without triage was the most cost-effective strategy, yielding more QALYs and cost savings compared to current strategies	Not specifically mentioned, but the study noted the potential for high screening and treatment performance and timely management with self-sampling	This study provides strong evidence that self-swab screening for HPV is not only cost-effective but also comparable in effectiveness to traditional pap smear screening. Self-sampling methods show high sensitivity and specificity, greater patient acceptability, and significant cost benefits, making them a viable and effective alternative for cervical cancer screening. These findings support the br…		Clear Focus: Y Acceptable Recruitment: Y Accurate measurement: Y Some confounders missing: N Results- Precise and believable: Y Consistent with other evidence: Y Relevance- Applicable to local population: Y Implications for practice: Y
10	Chiara Giubbi	Human papillomavirus (HPV) detection in vaginal self-samples: evaluation of eNat® as an alternative suspension medium to ThinPrep®PreservCyt® for vaginal swabs.	2022	Italy	Observational, prospective pilot study	30 women	Median age 36.5 years (interquartile range: 29.3–47)	Women referred to colposcopy for a recent abnormal Pap smear, reported as LSIL, HSIL, ASCUS, AGC, ASCH, or ACG	Immunocompromised patients, women with autoimmune diseases or any diseases involving the immune system, including HIV infection, presumed or confirmed pregnancy, diagnosis of any malignancies, or undergoing/finished chemotherapy in the six months preceding the study	Not specified	Not mentioned	FLOQSwab® 552C.80 device (Copan Italia SpA)	Not specifically mentioned; however, comparisons were made with the clinician-collected cervical sample used as the gold standard reference	Vaginal self-samples suspended in ThinPrep®PreservCyt®: 66.6% (20/30), 63.3% (19/30), and 66.6% (20/30) were hrHPV positive with Anyplex™II HPV28, Papilloplex® High Risk HPV, and HPV OncoPredict assays, respectively. Vaginal self-samples suspended in eNat®: 66.6% (20/30) were hrHPV positive with all three assays.	Cervical samples: 56.6% (17/30) were hrHPV positive with Anyplex™II HPV28, 53.3% (16/30) with HPV OncoPredict, and 50% (15/30) with Papilloplex® High Risk HPV.	Not specifically provided in the form of odds ratios or relative risks, but the study demonstrated substantial agreement between the self-sampling methods and the clinician-collected samples.	Substantial agreement for hrHPV detection between vaginal self-samples suspended in both media and cervical samples with Cohen's kappa statistics - Anyplex™II HPV28: 90.0% (κ=0.791), Papilloplex® High Risk HPV: 83.3% (κ=0.667), HPV OncoPredict: 90.0% (κ=0.796)	Substantial agreement was demonstrated between self-samples and clinician-collected samples, with Cohen's kappa values indicating high concordance.	Not specifically mentioned	Not directly assessed in the study; however, the study discusses the potential for self-sampling to improve participation in cervical cancer screening programs.	The study highlighted the potential cost-effectiveness of using eNat® due to its non-flammable nature and the ability to inactivate infectious agents, making it a suitable alternative to ThinPrep®PreservCyt® in low- and middle-income countries.	Not specifically mentioned in the study.	The study provides strong evidence supporting the effectiveness of self-swab screening for HPV. Self-sampling methods, when compared to traditional pap smear screenings, offer comparable detection rates, high sensitivity and specificity, and potential practical and cost benefits. These findings align with the broader goal of improving cervical cancer screening coverage and participation, particul…		Clear Focus: Y Acceptable Recruitment: Y Accurate measurement: Y Some confounders missing: N Results- Precise and believable: Y Consistent with other evidence: Y Relevance- Applicable to local population: Y Implications for practice: Y
11	Hélène De Pauw	Cervical cancer screening using HPV tests on self-samples: attitudes and preferences of women participating in the VALHUDES study.	2021	Belgium	Cross-sectional study	515 women	25–64 years (with a few participants outside this range: <25 years [N=10], ≥65 years [N=3])	Women referred to colposcopy because of previous cervical abnormalities (Atypical Squamous Cell where a High-grade squamous lesion cannot be excluded [ASC-H] or worse squamous cervical abnormalities, Atypical Glandular Cells [AGC], repeated low-grade abnormalities or HPV+ Atypical Squamous cells of Undetermined Significance [ASC-US]), and those age 25–64 years	Hysterectomised women, Women with known pregnancy, Non-consenting women, and Women not able to understand and sign the informed consent	Not specified	Vaccinated: 106 (20.6%), Unvaccinated: 336 (65.2%), Unknown: 65 (12.6%), Missing value: 8 (1.6%)	Vaginal self-sampling with cotton swabs and plastic brushes (Evalyn-Brush or Qvintip), and Urine sampling with the Colli-Pee device (although this is NOT relevant for this review)	Not specified in the text provided, but typically involves clinician-collected cervical samples.	Not explicitly mentioned	Not relevant	Not provided in the text	Not provided in the text	Not relevant	Not provided in the text	95% of women found instructions for self-collection clear, found collection easy, and were confident they performed the procedure correctly. 57% preferred self-sampling for the next screening round, while 41% preferred clinician collection.	Not provided in the text	Not provided in the text	Overall, the study supports the potential of self-swab screening methods to be effective, acceptable, and preferred alternatives to traditional pap smear screenings, thereby enhancing the reach and effectiveness of HPV screening programs.		CASP Qualitative study checklist 1. Clear aim: Y 2. Appropriate Methodology: Y 3. Appropriate Research design: Y 4. Appropriate recruitment: Y 5. Appropriate data collection: Y 6. Consideration of relationship between researcher and participants: can’t tell 7. Ethical issues considered: Y 8. Appropriate data analysis: Y 9. Clear statement of findings: Y 10. Implications for practice: Y
12	Katrin Christine Asciutto	Self-sampling with HPV mRNA analyses from vagina and urine compared with cervical samples.	2018	Sweden	Cross-sectional study	209 women	20–68 years (Mean age: 33.7 years, SD 11.1, Median 30.0)	Women attending the women’s clinic in Lund for colposcopy due to abnormal screening results or monitoring of dysplasia following previous excisional treatment	Status after hysterectomy, History of earlier gynecological cancer, or Current oncological treatment	Not specified	Not specified	Vaginal self-sampling using the Aptima Vaginal Swab Specimen Collection Kit (Hologic Inc), and Urine sampling using the Aptima Urine Specimen Collection Kit (Hologic Inc), although latter is not relevant for this review	Liquid-based cytology (LBC) using the ThinPrep device (PreservCyt Solution, Hologic Inc)	Vaginal self-samples: 85.5% sensitivity for detecting HSIL/AIS/cancer	Routine cytology: 81.7% sensitivity for detecting HSIL/AIS/cancer, and Clinician-taken cervical HPV samples: 100% sensitivity for detecting HSIL/AIS/cancer	Not provided in the text	The sensitivity of the HPV mRNA test for vaginal self-samples was statistically significant with a p-value < 0.001	Vaginal self-samples: 85.5% sensitivity, 48.1% specificity, Clinician-taken cervical HPV samples: 100% sensitivity, 49.0% specificity, Routine cytology: 81.7% sensitivity, 93.3% specificity	Vaginal self-samples: NPV 83.3%, Clinician-taken cervical HPV samples: NPV 100%, Routine cytology: NPV 93.3%	Not detailed in the text	Not detailed in the text	Not detailed in the text	Overall, this study supports the potential of vaginal self-swab screening for HPV as an effective and acceptable alternative to traditional pap smears, particularly for increasing screening coverage and reaching populations that may not participate in routine screenings.
13	Kimberly A. Kilfoyle	Preference for Human Papillomavirus Self-Collection and Papanicolaou: Survey of Underscreened Women in North Carolina.	2018	United States	Cross-sectional study	227 women	30–64 years	Women who had not received a Pap test in the previous 4 years, Lived in North Carolina, Not pregnant, Had not undergone a hysterectomy, Aged between 30–65 years, and Met one of the following income criteria - Had children that qualified for the federal school lunch program, Had Medicaid or Medicare Part B insurance, Were uninsured and living at or below 200% of the federal poverty level	Not detailed in the text	Majority (65%) were Black or “other” race, 62% had a high school education or less, 79% lived in an urban setting, 46% reported an annual household income less than $10,000 per year, 68% did not have health insurance	Not detailed in the text	Self-collected cervico-vaginal sample for HPV testing using the Aptima high-risk HPV RNA test (Hologic Corporation, Marlborough, MA)	Not detailed in the text	Not directly mentioned in terms of detection rate	Not directly mentioned in terms of detection rate	Not detailed in the text	Women reported less difficulty finding time for HPV self-testing (13%) compared to Pap testing (31%; p=0.003), More women reported being afraid of the self-test results (50%) compared to Pap test results (36%; p=0.02), Less physical discomfort and pain from self-collection than Pap testing (discomfort: 18% self; 48% Pap; pain: 8% self; 30% Pap, p=0.001)	Not detailed in the text	Not detailed in the text	51% of women preferred HPV self-collection, 19% preferred Pap testing, and 27% had no preference. High level of acceptability for HPV self-collection. Most respondents believed that the HPV self-test and Pap test protected women’s health equally well	Not detailed in the text	Not detailed in the text	The study concluded that a significant portion of underscreened women preferred HPV self-collection over Pap testing, indicating its potential to increase participation in cervical cancer screening. Additionally, self-collection was found to be easier and less uncomfortable than Pap testing, making it a more convenient option for many women.		CASP Qualitative study checklist 1. Clear aim: Y 2. Appropriate Methodology: Y 3. Appropriate Research design: Y 4. Appropriate recruitment: Y 5. Appropriate data collection: Y 6. Consideration of relationship between researcher and participants: can’t tell 7. Ethical issues considered: Y 8. Appropriate data analysis: Y 9. Clear statement of findings: Y 10. Implications for practice: Y
14	Manuela Viviano	Self- versus physician-collected samples for the follow-up of human papillomavirus-positive women in sub-Saharan Africa.	2018	Switzerland (study conducted in Cameroon)	Cross-sectional study	188 HPV-positive women were invited to attend follow-up, with 154 attending at 6 months and 131 at 12 months.	30–49 years	Women aged 30–49 years who were HPV-positive in a primary cervical cancer screening campaign, and Attendees of the Dschang District Hospital, Cameroon	Ongoing pregnancy, or Previous total hysterectomy	Mean age: 38.7 years, 93.1% married or in a stable relationship, 62.0% had a high-school diploma, Employment status: 64.4% employed, 6.4% farmers, 25.5% housewives, 3.7% others	Not detailed in the text	Self-HPV using a dry swab immersed in 5 mL of NaCl 0.9% solution	Liquid-based cytology using Cervex-Brush Combi and BD SurePath™ collection vial	At 6 months: Sensitivity for HSIL+ detection was 88.9%, At 12 months: Sensitivity for HSIL+ detection was 83.3%	At 6 months: Sensitivity for HSIL+ detection was 100%, At 12 months: Sensitivity for HSIL+ detection was 71.4%	κ value for agreement between Self-HPV and Dr-HPV at 6 and 12 months was 0.62 and 0.52, respectively	Sensitivity of Self-HPV for LSIL+ at 6 months: 84.6% (p=1.000), Sensitivity of Dr-HPV for LSIL+ at 6 months: 92.3% (p=1.000), Specificity of Self-HPV for LSIL+ at 6 months: 68.1% (p=0.043), Specificity of Dr-HPV for LSIL+ at 6 months: 75.7% (p=0.043), Sensitivity of Self-HPV for HSIL+ at 6 months: 88.9% (p=1.000), Sensitivity of Dr-HPV for HSIL+ at 6 months: 100% (p=1.000), Specificity of Self-HP…	At 6 months: Self-HPV Sensitivity for HSIL+: 88.9%, Specificity: 66.9%, At 6 months: Dr-HPV Sensitivity for HSIL+: 100%, Specificity: 74.3%, At 12 months: Self-HPV Sensitivity for HSIL+: 83.3%, Specificity: 65.6%, At 12 months: Dr-HPV Sensitivity for HSIL+: 71.4%, Specificity: 79.0%	At 6 months: Self-HPV PPV for HSIL+: 14.3%, NPV: 99.0%, At 6 months: Dr-HPV PPV for HSIL+: 19.6%, NPV: 100%, At 12 months: Self-HPV PPV for HSIL+: 10.4%, NPV: 98.8%, At 12 months: Dr-HPV PPV for HSIL+: 16.1%, NPV: 99.0%	Not detailed in the text	Not detailed in the text	Not detailed in the text	The study concluded that self-HPV testing is a valuable tool for the follow-up of HPV-positive women in low-resource settings. While the specificity of physician-collected samples (Dr-HPV) was slightly superior, the advantages of self-HPV, such as ease of use and higher patient participation, make it a viable option. The moderate-to-substantial agreement between self- and physician-collected samp…
15	Françoise F. Hamers	Updated evidence-based recommendations for cervical cancer screening in France	2019	France	Review and recommendations based on systematic reviews and meta-analyses	Not applicable (review study)	Recommendations apply to women aged 25-65 years	Asymptomatic women with a cervix aged 25-65 years, HPV vaccination status not considered for different screening procedure	Not detailed specifically as the study focuses on recommendations	The review provides recommendations for all women within the specified age range regardless of ethnicity or socio-economic status	Recommendations apply equally to vaccinated and unvaccinated women	Vaginal self-sampling for HPV testing	Liquid-based cytology	Self-sampling for HPV testing is as sensitive but slightly less specific than clinician-taken samples	HPV screening is more sensitive than cytology for detecting precancers but less specific	Not specifically detailed in the text	The protective effect of HPV-based screening became observable 2.5 years after screening	Self-sampling with HPV testing is as sensitive but slightly less specific than clinician-taken samples	Not detailed in the text	Self-sampling is more effective at reaching underscreened women compared to sending invitations for clinician-taken samples	Previous assessments showed cost-effectiveness of organized screening programs	Not detailed in the text	The study concludes that HPV-based screening is more effective than cytology for detecting cervical precancer and cancer. Self-sampling for HPV testing is as sensitive as clinician-taken samples but slightly less specific. The recommendations support the inclusion of self-sampling as a method to reach underscreened women and emphasize the need for organized screening programs to increase coverage…
16	Farhana Sultana	Women's experience with home-based self-sampling for human papillomavirus testing.	2015	Australia	Cross-sectional study as part of a larger randomized controlled trial ("iPap")	1521 women participated in self-sampling, 746 women returned the subsequent questionnaire	30–69 years	Women aged 30–69 years, Never-screened or under-screened women in Victoria, Australia, Residing in Victoria, Australia, Not pregnant at the time of the study, Had not had a hysterectomy	Not detailed in the text	Socioeconomic status (SES): distributed across quintiles, Screening history: 21% never-screened, 39% under-screened, 31% screened within 5 years, 9% unsure	Not detailed in the text	Nylon-tipped flocked swab (Copan Italia, Brescia, Italy)	Not specifically detailed, but the study compares self-sampling with Pap tests performed by doctors	Not specifically detailed in the text	Not specifically detailed in the text	Not specifically detailed in the text	Not specifically detailed in the text	Not specifically detailed in the text	Not specifically detailed in the text	94% found home-based self-sampling less embarrassing, 90% found it less uncomfortable, 98% found it more convenient compared to their last Pap test, 88% preferred to take the self-sample at home in the future	Not detailed in the text	Not detailed in the text	The study concluded that home-based self-sampling for HPV testing can overcome emotional and practical barriers associated with Pap tests, significantly increasing participation in cervical screening. Most women found self-sampling to be less embarrassing, less uncomfortable, and more convenient compared to their last Pap test, and the majority preferred to continue self-sampling at home in the f…		CASP Qualitative study checklist 1. Clear aim: Y 2. Appropriate Methodology: Y 3. Appropriate Research design: Y 4. Appropriate recruitment: Y 5. Appropriate data collection: Y 6. Consideration of relationship between researcher and participants: can’t tell 7. Ethical issues considered: Y 8. Appropriate data analysis: Y 9. Clear statement of findings: Y 10. Implications for practice: Y
17	Nicole G. Campos	Cost-Effectiveness of Offering Cervical Cancer Screening with HPV Self-Sampling among African-American Women in the Mississippi Delta.	2021	United States	Cost-effectiveness analysis based on a group randomized trial	Data based on a group randomized trial, exact sample size not specified for the cost-effectiveness analysis	25–65 years	African-American women, Aged 25–65 years, Residing in the Mississippi Delta, No prior history of cervical cancer or hysterectomy, Not currently pregnant, Had not given birth in the prior 8 weeks, Had not been screened in the last four years	Not specifically detailed	Focused on un/underscreened African-American women in the Mississippi Delta, one of the poorest regions in the United States with significant health disparities	Not detailed in the text	Self-collection at home for HPV testing	Cytology (Pap test) and HPV co-testing at Health Department clinics	Not specifically detailed in the text	Not specifically detailed in the text	“Choice” strategy reduced lifetime risk of cervical cancer by 14.8%, “Standard-of-care” strategy reduced cancer risk by 6.4%, “Choice” strategy cost $62,720 per year of life saved (YLS)	Detailed comparative statistics and significance not provided, but "Choice" strategy found to be more effective and efficient	Test sensitivity/specificity for CIN2+: Pap/HPV co-testing: 96.3%/80.6%, Test sensitivity/specificity for CIN2+: hrHPV self-collection: 95.3%/72.2%	Not specifically detailed in the text	Women in the “Choice” arm were more than five times as likely to adhere to screening compared to women in the “Standard-of-care” arm	"Choice" strategy cost $62,720 per YLS when offered every 5 years, ”Standard-of-care" strategy was not found to be efficient	Not detailed in the text	The study concludes that offering a "Choice" between self-collection at home for HPV testing and the current standard of care (cytology and HPV co-testing) led to greater screening uptake among un/underscreened African-American women in the Mississippi Delta and may be cost-effective. The "Choice" strategy was more effective and efficient in reducing the lifetime risk of cervical cancer compared …
18	Sarah Untiet	HPV self-sampling as primary screening test in sub-Saharan Africa: implication for a triaging strategy.	2014	Switzerland & Cameroon	Prospective cohort Study	649 women were included in the final analysis	20 to 89 years Median age: 44 years	Non-pregnant women aged between 20 and 89 years, no previous cervical therapy or hysterectomy	Not specified, but they excluded 45 for missing cytology results	Majority were well educated (university 18.1%, high school 47.7%) Majority were married (71.1%) Median number of sexual lifetime partners: 2.6 Median age at first sexual intercourse: 18.2 years	Not mentioned	Participants received a flyer with written instructions and drawings explaining how to perform the self-sampling together with a sterile, flocked swab and transportation tube (ESwab, Copan, Brescia, Italy) for Self-HPV testing.	Liquid cytology using a broom type cervical brush and Preservcyt buffer solution (Hologic, Bedford, MA).	0.146	0.127	OR for ASC-US+: 6.5 (3.2–13.4) RR for ASC-US+: 5.4 (2.9–10.0) NNT for ASC-US+: 6.0 (4.2–10.9) NNT for HSIL: 15.5 (15.5–35.2) OR and RR were incalculable for HSIL	No significant difference between Self-HPV and Physician-HPV in all these measurements. The study didn't provide p-values.	Specificity for HSIL: 86.6% (86.2–86.6%) Sensitivity for HSIL: 100% (52.1–100%) Specificity for ASC-US+: 87.8% (86.9–88.9%) Sensitivity for ASC-US+: 45.0% (30.3–60.3%)	Overall PPV for ASC-US+: 19.6 Overall PPV for HSIL: 6.5 PPV for women aged 30–49 years for ASC-US+: 23.5 PPV for women aged 30–49 years for HSIL: 27.8 NPV was not mentioned	Opinions and preferences about the sampling options were collected via a questionnaire (results partly published elsewhere)	Not mentioned	Test tubes were stored and transported at 4 degrees celsius and analyzed within 4 weeks.	This study demonstrates the effectiveness and reliability of self-sampling for HPV testing compared to physician-collected samples. Self-sampling methods showed a high detection rate of HPV, with comparable sensitivity and specificity to traditional Pap smears. The study found no significant difference between the self-collected and physician-collected samples, supporting the feasibility of self-…		Clear Focus: Y Acceptable Recruitment: Y Accurate measurement: Y Some confounders missing: Y Results- Precise and believable: Y Consistent with other evidence: Y Relevance- Applicable to local population: Y Implications for practice: Y
19	Louise Cadman	A Randomized Comparison of Different Vaginal Self-sampling Devices and Urine for Human Papillomavirus Testing-Predictors 5.1.	2021	UK	Randomized controlled trial	The study included 600 women, each providing paired vaginal samples and a urine sample. Of these, 505 women provided adequate urine samples, which were included in the analysis​	21 to 63 years	Women referred to the Royal London Hospital colposcopy clinic with a positive screening result. Women under observation for prior abnormalities, provided their most recent abnormal smear test was within the last three years	Pregnancy Ablation/excision treatment to the cervix within the last three years​	Median age was 29y (IQR: 27-33, range 21-63), and 330 (53.2%) were aged less than 30 years, 261 (42.1%) were aged 30-44 years and 29 (4.4%) were aged 45 or older	Not mentioned	Dry flocked swab (DF), Dacron swab (WD), HerSwab (HS), Qvintip (QT), and initial stream urine sample using Colli-Pee® device	Not applicable, as this study focused on self-sampling methods	DF: 71.7% WD: 71.7% QT: 69.3% HS: 65.1% Urine: 76.0%	Not applicable	High agreement in HPV positivity between WD and DF (kappa = 0.801), lower agreement between QT and HS (kappa = 0.753), and even lower between urine and the vaginal samples (kappa = 0.568-0.646)	No significant differences in hrHPV positivity rates for different devices compared to WD (P-values: Urine = 0.17, QT = 0.52, HS = 0.09)	Sensitivity for CIN3+: WD: 91.2% DF: 88.2% QT: 81.8% HS: 77.4% Urine: 89.7% Specificity for <CIN2: WD: 34.2% DF: 33.8% QT: 34.3% HS: 39.5% Urine: 27.4%	Not mentioned	Clear preference for DF over WD (71.4%, P=0.003), but no clear preference between QT and HS (53.4% preferred HS, P=0.48). HS device emerged as the device least easy to use with 12.6% indicating it was quite difficult or very difficult Urine sample well-received	Not explicitly provided, but the study notes the importance of cost and simplicity, particularly in low and middle-income countries	Samples were stored locally at 4-8°C before being transported to the laboratory within 2 weeks of collection.	The study concluded that self-sampling for HPV testing is a viable alternative to clinician-collected samples for cervical screening. Both the WD and DF swabs demonstrated high hrHPV positivity rates and were well-received by participants, with a clear preference for the DF swab due to its ease of use and ability to be transported dry, which is advantageous for home collection. Urine samples also…		CASP RCT checklist 1. Clear focus of research question: Y 2. Randomised assignment: Y 3. All participants accounted: Y 4. Study blind: Y 5. Study groups similar: Y 6. Study groups treated equally: Y 7. Effects reported comprehensively: Y 8. Precision of results: Y 9. Benefits of results outweigh harms and costs: Y 10. Results can be applied to local population: Y 11. Provide greater value: Y	Selection Bias: Low Risk Performance Bias: Low Risk Detection Bias: Low Risk Attrition Bias: Low Risk Reporting Bias: Low Risk Overall Judgement: Low Risk
20	Kawano-Yashiro Aiko	Accuracy of self-collected human papillomavirus samples from Japanese women with abnormal cervical cytology.	2017	Japan	Comparative study	159 enrolled (136 completed study)	20 to 69 years	Women aged 20-69 years Abnormal cervical cytology results	Pregnancy Use of vaginal suppositories History of previous conization Smear test result indicating invasive cancer	Age Group: 20–29: 8.1% of participants 30–39: 31.6% of participants 40–49: 36.0% of participants 50–59: 17.7% of participants 60–69: 6.6% of participants Educational Level: Less than High School: 4.4% High School: 25.0% More than High School: 67.6% Marital Status: Married: 66.9% Divorced: 15.4% Never Married: 16.2% Smoking Status: Smoker: 16.9% Ex-Smoker: 32.4% Never Smoked: 48.5%	not mentioned	Evalyn Brush (Rovers Medical Devices B.V.)	conventional smears with the Cytopic device (Matsunami Glass Ind.) and for pHPV testing with the Digene HC2 DNA Collection Device (Qiagen).	40.4% (55/136)	61.0% (83/136)	Not provided in the text	Statistically significant vs pHPV: P < 0.05 Statistically significant vs pHPV: P < 0.001	Sensitivity for detecting ≧CIN2: 59.4% (sHPV) vs. 100% (pHPV) Sensitivity for detecting CIN3: 66.7% (sHPV) vs. 100% (pHPV) Specificity for detecting ≧CIN2: 65.4% (sHPV) vs. 51% (pHPV) Specificity for detecting CIN3: 61.4% (sHPV) vs. 41.7 (pHPV)	PPV for sHPV for ≧CIN2 = 34.5 (22.0–47.1) PPV for sHPV for CIN3 = 10.9 (2.7–19.1) PPV for pHPV for ≧CIN2 = 38.6 (28.1–49.0) PPV for pHPV for CIN3 = 10.8 (4.2–17.5) NPV for sHPV for ≧CIN2 = 84.0 (76.0–91.9) NPV for sHPV for CIN3 = 96.3 (92.2–100.0) NPV for pHPV for ≧CIN2 = 100 NPV for pHPV for CIN3 = 100	Self-collected HPV (sHPV) testing was favorably accepted by the participants, with less embarrassment and pain reported compared to physician-collected HPV (pHPV) testing. Specifically: 68.3% of participants reported no embarrassment with sHPV testing compared to 12.5% with pHPV testing. 59.5% reported no pain with sHPV testing compared to 11.0% with pHPV testing.	Not mentioned directly	Not mentioned directly	The study concludes that sHPV testing could improve cervical cancer screening participation rates due to its favorable acceptance, reduced embarrassment, and pain compared to pHPV testing. It also notes that further improvements in the instructions for self-sampling could enhance its effectiveness. The study suggests that sHPV testing might be a practical tool for increasing screening rates, part…		Clear Focus: Y Acceptable Recruitment: Y Accurate measurement: Y Some confounders missing: N Results- Precise and believable: Y Consistent with other evidence: Y Relevance- Applicable to local population: Y Implications for practice: Y
21	KATRIN CHRISTINE ASCIUTTO	Vaginal and Urine Self-sampling Compared to Cervical Sampling for HPV-testing with the Cobas 4800 HPV Test.	2017	Sweden	Comparative study	218 women	19 to 71 years	Women aged 19 to 71 years with an abnormal cervical smear in the screening program or with symptoms were invited to the Outpatient Colposcopy Clinic at regional hospitals in Kristianstad and Helsingborg	not mentioned	The mean age of the 218 patients included was 35.2 years (SD=10.8 years; range=19-71 years)	not mentioned	Self-collected urine sample and vaginal swab (Cobas® PCR Female Swab Sample Kit)	Liquid-based cytology (LBC) specimen​	Vaginal self-sampling: 96.4% sensitivity Urine self-sampling: 83.9% sensitivity​	Not specifically detailed in the text	The kappa value between the vaginal self-sampling test and the clinician-taken sample was 0.82 (95% CI=0.73- 0.91; p<0.001), while that between urine and clinician-taken sample was 0.58 (95% CI=0.46-0.70; p<0.001). The vaginal self-sampling and the clinician-taken HPV tests h	P <0.05	The vaginal self-sampling and the clinician-taken HPV tests had the same sensitivity of 92.8% (95% confidence interval=86.3- 96.8%) and specificity for detection of high-grade squamous intraepithelial lesion (HSIL) and adenocarcinoma in situ (AIS). Detection in urine samples had a sensitivity of 76.3% (95%	NPV for HSIL/AIS in vaginal self-sampling: 79% NPV for HSIL/AIS in urine sampling: 57.4% NPV for HSIL/AIS in cytology: Not explicitly stated​ PPV not mentioned	None of the women in this study reported that vaginal self-sampling was uncomfortable. The swab sample kit was easy to use and the women did not report any difficulties or problems with the written and figure instructions, probably due to a widespread use of tampons for menstrual bleeding.	Clinician-taken cervical HPV sample: at least €40 plus the cost of HPV analysis Self-sampling vaginal devices, logistics, and transport: less than 1/10th of the clinician-taken sample​	All samples were transported and analyzed within 3 weeks​	The study concluded that self-sampling methods, particularly vaginal swabs, are highly concordant with clinician-taken cervical samples for detecting high-risk HPV, with a sensitivity of 96.4% and strong agreement (kappa value of 0.82). These methods are also cost-effective, being less than one-tenth the cost of clinician-taken samples, and can increase screening coverage, especially among women …		Clear Focus: Y Acceptable Recruitment: Y Accurate measurement: Y Some confounders missing: Y Results- Precise and believable: Y Consistent with other evidence: Y Relevance- Applicable to local population: Y Implications for practice: Y
22	Ann Edblad-Svensson	High-Risk Types of Human Papilloma Virus DNA Testing in Women with False Negative Cytology.	2018	Sweden	Comparative study	63 women	24 to 64 years	Patients identified with a missed abnormality following the re-evaluation of be- nign cervical cytology were included	Non-Swedish speaking patients and patients with missing data.	Mean Age of Participants: 42 years	Not mentioned	Qvintip® self-sampling device	Conventional Papanicolaou (Pap) smear and liquid-based cytology	Detection Rate of HPV in Self-Sampling Group: 84.6% sensitivity for CIN2+ (95% CI 59.1–96.7)	Detection Rate of HPV in Pap Smear Group: 100% sensitivity for CIN2+ (95% CI 82.7–100)	kappa value of 0.74 (95% CI 0.57–0.91). Agreement between the physician-collected sample and the self-collected sample was good	Not specifically detailed in the text	Self-Sampling Sensitivity: 84.6% (95% CI 59.1–96.7) Self-Sampling Specificity: 68% (95% CI 54.3–79.6) Pap Smear Sensitivity: 100% (95% CI 82.7–100) Pap Smear Specificity: 72% (95% CI 58.6–83.0)	Self-Collected Sampling PPV: 40.7% (95% CI 23.9–59.4) Self-Collected Sampling NPV: 94.4% (95% CI 83.4–98.8) Physician-Collected Sampling PPV: 48.1% (95% CI 30.3–66.4) Physician-Collected Sampling NPV: 100% (95% CI 93.3–100	Not specifically mentioned	Not specifically mentioned	Not specifically mentioned	The study findings indicate that high-risk HPV DNA testing on physician-collected samples is highly sensitive and has a high negative predictive value for detecting high-grade cervical intraepithelial neoplasia (CIN2+). This makes it a reliable method for triaging women with a history of false negative cytology for further investigation via colposcopy. While self-sampling for hrHPV also showed go…
23	Eliza L.Y. Wong	Can Human Papillomavirus DNA Self-sampling be an Acceptable and Reliable Option for Cervical Cancer Screening in Female Sex Workers?	2018	Hong Kong Special Administrative Region (HKSAR) of China	Clinical trial	68 women	22 to 59 years	Aged 18 years or older Not currently pregnant No known abnormal Papanicolaou test results No symptoms of cervical cancer, genital cancer, cervical surgery, or immune treatment of the cervix in the last 6 months	implied by the inclusion criteria	Mean age of participants: 38.2 years Approximately half had upper secondary education or above 51.6% were married or cohabiting 77.4% had at least one child 72.6% resided in HKSAR 61.9% were nonsmokers 87.5% were infrequent drinkers 76.2% had undergone Papanicolaou tests before 70.3% rated their health as average or above	Not mentoned	HPV DNA self-sampling using a Dacron swab inserted at least 2 inches into the vagina with 2 full rotations, then placed in a vial of phosphate-buffered saline	Clinician-obtained ectocervical samples using a cytobrush and a Dacron swab	Detection rate of HPV in self-sampling group: 39.7% (27/68)	Detection rate of HPV in Pap smear group: 36.8% (25/68)	Kappa (κ) coefficient: 0.69 (95% confidence interval, 0.51-0.87)	No statistically significant difference in the detection of HPV DNA was found between the 2 types of sample collection (McNemar test=0.4; P=.527).	Sensitivity of self-smapling: 66.7% Specificity of self-sampling: 66.1%	PPV of self-sampling: 24.0% NPV of self-sampling: 92.5%	65.6% preferred HPV DNA self-sampling 34.4% preferred clinician sampling Higher preference for self-sampling among those without previous Pap test experience (86.7%)	The NPV indicated that HPV DNA self-sampling could potentially be incorporated into conventional screening to lengthen the interval between cervical screening and thus make it more cost- effective	Not specifically mentioned	The study demonstrates that HPV DNA self-sampling is a feasible and acceptable alternative to clinician-sampling for cervical cancer screening among female sex workers. The method shows a high level of acceptance due to its convenience and privacy, and it has the potential to increase screening compliance in underscreened populations. Although the self-sampling method has slightly lower sensitivi…
24	Federica Inturrisi	Clinical performance of high-risk HPV testing on self-samples versus clinician samples in routine primary HPV screening in the Netherlands: An observational study.	2021	Netherlands	Observational study	Total 487,015 women, with 30,808 women in the self-collected group and 456,207 in the clinician-collected group​	30 to 60 years	Women invited for high-risk HPV (hrHPV) testing in the Dutch cervical screening program​	Not detailed in the text	Women in the self-collection group had a mean age of 46.7 years, slightly younger than those in the clinician-collection group with a mean age of 47.8 years​	Not mentoned	Self-collected samples using the Evalyn Brush	Clinician-collected samples using a Cervex Brush	7.4% positive hrHPV test result​	9.3% positive hrHPV test result​	In hrHPV- positive women with adequate cytology, Ct values were higher for self-collection than clinician-collec- tion with a mean Ct difference of 1¢25 (95% CI 0¢98_x0001_1¢52) in women without CIN2+, 2¢73 (1¢75_x0001_3¢72) in CIN2 and 3¢59 (3¢03_x0001_4¢15) in CIN3+	Differences were assessed using chi-square testing and z-testing; statistical significance was considered when the two-sided p-value was below 0.05​	Relative sensitivity was 0.88 (95% CI 0.72–1.08) self-sampling and 0.94 (0.90–0.97) for clinician-collected samples Self-sampling showed a 6% lower sensitivity but 2% higher specificity compared to clinician-based hrHPV testing​	Not mentioned	not mentioned	not mentioned	Median time between baseline cytology and histology was 1.3 months for the self-collection group and 1.5 months for the clinician-collection group​	The study confirms that hrHPV testing on self-collected cervicovaginal material is an accurate alternative to clinician-collected samples in primary hrHPV-based screening programs. Self-sampling can effectively target underscreened women and serve as a convenient primary screening tool. Despite a slight decrease in sensitivity compared to clinician-collected samples, self-sampling meets clinical …		Clear Focus: Y Acceptable Recruitment: Y Accurate measurement: Y Some confounders missing: N Results- Precise and believable: Y Consistent with other evidence: Y Relevance- Applicable to local population: Y Implications for practice: Y
25	M. J. Gibert	Validity and acceptance of self vs conventional sampling for the analysis of human papillomavirus and Pap smear.	2023	Spain	Cross-sectional study	120 women	35 to 65 years	Women aged between 35 and 65 years	Pregnancy and the first six weeks of the puerperium Not having a cervix (prior hysterectomy or trachelectomy) Vaginal bleeding Use of medication, creams, or vaginal douches in the last 48 hours before sample collection Ignorance of the co-official languages of the Balearic Islands by the participant and, if applicable, by her companion Illiteracy in the strict or functional sense Inability to per…	Median age: 46 years Nationality: 62.5% born in Spain Education level: 39.2% had secondary or high school education Employment: 47.5% were receiving social welfare, mainly due to the COVID-19 pandemic​	not mentioned	They used two devices for dry samples and another two for liquid samples: Viscose swab and Iune HPV test cannula for dry samples Viba-Brush® and Mía by Xytotest® for liquid medium samples​	The device for clinician sampling was the Rovers Cervex-Brush® (Rovers Medical Devices B. V., Oss, The Netherlands), a swab with hydrophobic flexible bristles that allows the simul- taneous collection of exo and endocervical cells.	HPV Test Results by Device: Viscose Swab: Negative: 62.3% Positive for type 16 ± other types: 9.8% Positive for type 18 ± other types: 4.9% Positive for only other types: 23.0% Iune Device: Negative: 57.4% Positive for type 16 ± other types: 11.5% Positive for type 18 ± other types: 4.9% Positive for only other types: 26.2% Mía by Xytotest®: Negative: 57.6% Positive for type 16 ± other types: 13.…	HPV Test Results (Conventional Sampling) Negative: 62.5% (75 out of 120 samples) Positive for Type 16 ± other types: 9.2% (11 out of 120 samples) Positive for Type 18 ± other types: 3.3% (4 out of 120 samples) Positive for only other types: 25.0% (30 out of 120 samples)​ Cytological Results (Conventional Sampling) Negative: 59.4% ASC-US and LSIL: 33.3% ASC-H, AIS, and HSIL: 7.3%​	The agreement between self and conventional samples regarding HPV positivity was very good, with the following kappa coefficients: Mía by Xytotest®: κ = 0.86 Viba-Brush®: κ = 0.83 Iune: κ = 0.73 Viscose Swab: κ = 0.68	A significant difference was found in endocervical cellularity between self-sampling and clinician samples. Conventional samples showed higher endocervical cell presence (p < 0.0001)​ There was a significant difference in the adequacy of Pap smears between self-collected and clinician-collected samples, with a higher rate of unsatisfactory samples in the clinician group (p < 0.01)​ Younger partic…	Mía by Xytotest®: Sensitivity of 95.7%, Specificity of 91.7% Viba-Brush®: Sensitivity of 95.7%, Specificity of 88.9% Iune: Sensitivity of 90.9%, Specificity of 84.6% Viscose Swab: Sensitivity of 81.8%, Specificity of 87.2% Cytological Results for Self-Sampling Viba-Brush®: Sensitivity (95% CI): 65.0% (40.8%-84.6%) Specificity (95% CI): 84.6% (65.1%-95.6%) Kappa Coefficient (95% CI): 0.51 (0.25–0.…	Not provided	110 out of 120 participants (91.7%) viewed self-sampling as advantageous. 66 participants (60.0%) appreciated the ability to choose the time and place for sampling. 66 participants (60.0%) valued the comfort and ease of scheduling 42 participants (38.2%) preferred the privacy of self-sampling to avoid exposing genitals to healthcare staff. 24 participants (21.8%) cited reduced fear of pain or dis…	not mentioned	six weeks for cytology and two weeks for HPV at room temperature​	The study concludes that self-sampling for HPV testing and cytology is a viable and well-accepted alternative to clinician sampling. The self-sampling devices, particularly those used in a liquid medium, showed a very good agreement with conventional clinician-collected samples for HPV detection, with kappa coefficients indicating reasonable to very good agreement. The use of self-sampling could …		Clear Focus: Y Acceptable Recruitment: Y Accurate measurement: Y Some confounders missing: N Results- Precise and believable: Y Consistent with other evidence: Y Relevance- Applicable to local population: Y Implications for practice: Y
26	Kimon Chatzistamatiou	Comparison of different strategies for the triage to colposcopy of women tested high-risk HPV positive on self-collected cervicovaginal samples.	2021	Greece	diagnostic accuracy sub-analysis of the GRECOSELF study ( a cross-sectional study conducted in Greece focused on cervical cancer screening using self-collected samples)	773 women	In table 1 it indicates that age of study population is 18 to 65 years, with a median age of 32 years but in inclusion criteria it's 25-60	Non-pregnant women Aged 25-60 years Residing in rural areas of Greece Tested high-risk HPV positive on self-collected cervicovaginal samples	Pregnant women	Majority pre-menopausal (88.6%) 56.5% married 70.8% had at least one child 44.0% non-smokers, 43.6% ex-smokers 66.9% attended higher education Mean age: 35.11 (Sd:10.52)	70 (9.1%) were vaccinated	Self-collected cervicovaginal samples using a dry cotton swab	Papanicolaou smear test (Pap test), collected by physician​	not specifically mentioned	not specifically mentioned	not specifically mentioned	Not specifically detailed in the text	Self-sampling with HPV16/18 genotyping showed a sensitivity of 96.36%​	PPV: 27.46% NPV: not provided​	self-sampling were noted to be high, as self-sampling increased participation among under-screened populations. This method allowed women to collect samples in a less invasive and more comfortable setting, leading to improved screening uptake​	not mentioned	not mentioned	The study concluded that HPV self-sampling combined with HPV16/18 genotyping is an effective strategy for cervical cancer screening. It emphasizes the benefits of reducing unnecessary colposcopies and increasing screening participation. The optimal triage strategy recommended is to refer women who test positive for HPV16 directly to colposcopy, while those positive for other high-risk HPV types s…		Clear Focus: Y Acceptable Recruitment: Y Accurate measurement: Y Some confounders missing: N Results- Precise and believable: Y Consistent with other evidence: Y Relevance- Applicable to local population: Y Implications for practice: Y
27	Sharon Jb Hanley	HPV self-sampling in Japanese women: A feasibility study in a population with limited experience of tampon use.	2016	Japan	Cross-sectional study	203 women	20-49	n/a	n/a	japanes women	not explicitly mentioned	Evalyn Brush (Rovers Medical Devices BV, Netherlands)	Qiagen’s Hybrid Capture II (HC-II) hr-HPV DNA Test (Qiagen, Mitsubishi Chemical Medience Corporation, Japan)	0.86	1	not specifically mentioned	p values mentioned, very significant	similar sensitivity (mentioned in intro when referring to a conclusion from a meta analysis)	Not mentioned	Ninety per cent of participants stated they would use self-sampling again. They found instructions easy to follow and reported no issues with the usability of the self-sampling device. Compared with physician-led testing, women found self-sampling significantly less painful, less embarrassing and could relax more (p < 0.001), regardless of history of tampon use, which was associated with negative…	not mentioned	not mentioned	Self-sampling was highly acceptable in this population of women. They could perform the test safely unsupervised, but lacked confidence the test has been carried out correctly.		CASP Qualitative study checklist 1. Clear aim: Y 2. Appropriate Methodology: Y 3. Appropriate Research design: Y 4. Appropriate recruitment: Y 5. Appropriate data collection: Y 6. Consideration of relationship between researcher and participants: can’t tell 7. Ethical issues considered: Y 8. Appropriate data analysis: Y 9. Clear statement of findings: Y 10. Implications for practice: Y
28	Jasmin A Tiro	Understanding Patients' Perspectives and Information Needs Following a Positive Home Human Papillomavirus Self-Sampling Kit Result.	2019	not mentioned	Cross-sectional study	46 women	median age: 56	used the trial database and EHR to identify, on a weekly basis, eligible subjects from the trial who (1) were randomized to the intervention arm, (2) returned the kit, and (3) tested positive for any hrHPV type	opposuite of the inclusion criteria	91.3% non hispanic, 78.3 % dont have a High deductible plan (insurance measure)	not explicitly mentioned	not mentioned	not mentioned	not mentioned	not mentioned	not specifically mentioned	p-Value for chi-square or Fisher exact test was <0.05	not mentioned	not mentioned	Theme 1: Convenience of HPV kit Women liked the convenience of a mailed hrHPV kit. Theme 2: Intense affect after receiving positive kit results Most participants reported experiencing intense affect (feelings and emotions) after receiving positive kit results. Theme 3: Information seeking from various sources Shock and fear about the kit findings triggered many questions. Theme 4: Importance of f…	High deductible plan is defined as meeting one of these three criteria: (1) individual annual deductible ≥$1350; (2) family annual deductible ≥$2700; (3) specialty visit copayment >$30.	Continuous enrollment for at least 3.4 years before randomization (allowing for gaps of up to 2 months) was an eligibility criterion for the main trial.	Although women liked the kit's convenience, discussion about discordant home HPV and in-clinic Pap results led them to question the accuracy of HPV self-sampling		CASP Qualitative study checklist 1. Clear aim: Y 2. Appropriate Methodology: Y 3. Appropriate Research design: Y 4. Appropriate recruitment: Y 5. Appropriate data collection: Y 6. Consideration of relationship between researcher and participants: can’t tell 7. Ethical issues considered: Y 8. Appropriate data analysis: Y 9. Clear statement of findings: Y 10. Implications for practice: Y
29	Jessica Yasmine Islam	High-risk Human Papillomavirus Messenger RNA Testing in Wet and Dry Self-collected Specimens for High-grade Cervical Lesion Detection in Mombasa, Kenya.	2022	Mombasa, Kenya	Cohort study	400 women	over 25	The criterion for inclusion into the Mombasa Cohort included: 1. Women aged 18 years and above; 2. Residing in the Mombasa area; 3. Self-identifying as exchanging sex for payment in cash or in-kind at the time of enrollment and 4. Able to provide informed consent.	opposuite of the inclusion criteria	sex workers in kenya	not explicitly mentioned	2 self-collected specimens: one stored dry (sc-DRY) using a Viba brush (Rovers) and one stored wet (sc-WET) with Aptima media (Hologic) using an Evalyn brush (Rovers).	conventional cytology	Concordance of hr-HPV mRNA detection between self-collected stored wet (sc-WET) and dry (sc-DRY) Overall, approximately one-third of women tested positive for hr-HPV mRNA using the self-collected sampling stored wet (n=147, 37%) or stored dry (n=127; 32%). A quarter of women (97/387) were positive for hr-HPV mRNA with both sc-WET and sc-DRY samples; 12% (47/387) were hr-HPV mRNA positive using th…	not mentioned	not specifically mentioned	p=0.02, significant	look at table 3. Performance of hr-HPV mRNA testing of self-collected stored wet, self-collected stored dry, and physician-collected specimens, and visual inspection with acetic acid for the detection of ≥HSIL The overall sensitivity estimates of hr-HPV mRNA for ≥HSIL of sc-WET [85%] and sc-DRY [78%] were comparable (Difference: −0.07). Physician-collected samples for hr-HPV mRNA testing showed a…	The positive predictive value was 16% for sc-WET and 17% for sc-DRY. The positive predictive value for physician-collection specimens was 19%.	36% of women reported preferring self-collection compared to physician-collection. ADDITIONAL INFO: Women more frequently reported to prefer self-collection stored dry (46%) compared to storage in media (31%). Most women agreed that the Evalyn brush (used for dry storage) was comfortable to insert (88%) and came with instructions easy to understand (95%). About half of participants were concerned…	not mentioned	5 years	In conclusion, based on our findings, the use of dry-stored specimens appears to be a viable option for hr-HPV mRNA testing due to the similar sensitivity and specificity compared to wet-stored self-collected hr-HPV testing for ≥HSIL detection.		Clear Focus: Y Acceptable Recruitment: Can't tell Accurate measurement: Y Some confounders missing: Y Results- Precise and believable: Y Consistent with other evidence: Y Relevance- Applicable to local population: Y Implications for practice: Y
30	D L Loopik	Reflex cytology for triage of high-risk human papillomavirus positive self-sampled material in cervical cancer screening: a prospective cohort study.	2020	Netherlands	Prospective cohort Study	1014 screenees	30-60	Women aged 30-60, HPV-positive	Pregnant women, history of cervical cancer	socioeconomic status not specified	Not specified	Evalyn Brush	Conventional cytology	0.294	not mentioned	Chi-square test	p < 0.05	Reflex cytology on self‐samples for detecting abnormal cytology showed a sensitivity of 26.4% and specificity of 90.5%	The positive predictive value for detection of ≥CIN2 was higher with cytology on self‐collected samples than on physician‐collected samples. PPV for Self sampling was 64.6% and NPV was 65.1%	not explicitly mentioned	not explicitly mentioned	1 year	Cytology testing is direct applicable on hrHPV‐positive self‐samples and is of added value as a direct triage test for immediate referral stratification, which will improve patient satisfaction, reduce diagnostic delay and loss to follow up, and could be easily implemented in current clinical practice.		Clear Focus: Y Acceptable Recruitment: Y Accurate measurement: Y Some confounders missing: Y Results- Precise and believable: Y Consistent with other evidence: Y Relevance- Applicable to local population: Y Clear Focus: Y Acceptable Recruitment: Y Accurate measurement: Y Some confounders missing: Y Results- Precise and believable: Y Consistent with other evidence: Y Relevance- Applicable to local…
31	Nicole J Polman	Performance of human papillomavirus testing on self-collected versus clinician-collected samples for the detection of cervical intraepithelial neoplasia of grade 2 or worse: a randomised, paired screen-positive, non-inferiority trial.	2019	Netherlands	Randomized controlled trial	13925 women	29-61	Women were enrolled in the IMPROVE study if they returned a signed informed consent form between April 15, 2015, and Dec 13, 2016.	Exclusion criteria were previous hysterectomy and childbirth less than 6 months ago (exclusion criteria for invitation to routine cervical screening), as well as current pregnancy	midwestern, southwestern, eastern	Not specified	Evalyn Brush (Rovers Medical Devices BV, Oss, Netherlands)	Cervex-Brush (Rovers Medical Devices BV)	CIN2: 96%	CIN2: 93%	not specifically mentioned	Not specifically detailed in the text	The CIN2+ sensitivity and specificity of HPV testing did not differ between self-sampling and clinicianbased sampling (relative sensitivity 0·96 [0·90–1·03]; relative specificity 1·00 [0·99–1·01]). For the CIN3+ endpoint, relative sensitivity was 0·99 (0·91–1·08) and relative specificity was 1·00 (0·99–1·01).	not mentioned	not mentioned	not mentioned	5 years	HPV testing done with a clinically validated PCR-based assay had similar accuracy on self-collected and clinician-collected samples in terms of the detection of CIN2+ or CIN3+ lesions. These findings suggest that HPV self-sampling could be used as a primary screening method in routine screening.			Selection Bias: Low Risk Performance Bias: Low Risk Detection Bias: Low Risk Attrition Bias: Low Risk Reporting Bias: Low Risk Overall Judgement: Low Risk
32	A Boers	DNA methylation analysis in self-sampled brush material as a triage test in hrHPV-positive women.	2014	Netherlands	randomised controlled trial	10 027 women	33–63	participated in the PROHTECT-3B, and aged 33-63	didnt send back the self sampling kit	Dutch women that participated in the PROHTECT-3B	not explicitly mentioned	(Evalyn Brush, Rovers Medical devices B.V., Oss, The Netherlands), (GP5+/6+ PCR; EIA HPV GP HR kit; Diassay, Voorburg, The Netherlands)	not explicitly mentioned	n/a	n/a	not specifically mentioned	P<0.001	DNA methylation analysis of JAM3 showed the highest combined specificity (88%) and sensitivity (82%) for detection of CIN3+, whereas cytology showed a specificity of 48% and a sensitivity of 91%.	although referral was higher in the methylation triage group given the positive predictive value of this test being lower compared with cytology	not mentioned	not explicitly mentioned	not mentioned	DNA methylation analysis as a triage test in hrHPV-positive women is an attractive alternative to cytology. Furthermore, DNA methylation is feasible directly on brush-based self-samplers and showed good correlation with matched physician-taken samples. Direct molecular triage on self-collected specimens could optimise the screening program, especially for non-responders, as this would eliminate t…		Did they review address - yes clearly focused question Did the authors look for the right type of papers? - can't tell Do you think all the important,relevantstudies wereincluded - yes	Selection Bias: Low Risk Performance Bias: Low Risk Detection Bias: Low Risk Attrition Bias: Low Risk Reporting Bias: Low Risk Overall Judgement: Low Risk
33	Bernhard	Self-Collected Samples in Cervical Cancer Screening: Results of HPV and Pap Self-Collected Samples Compared to Physician-Obtained Specimens.	2019	/	Cross-sectional study	208 women	/	/	/	/	not explicitly mentioned	Rovers® Viba-Brush	Conventional cytology	Differences between test positivity (HPV-hr) and test negativity were higher in the self-test group (Fig. 1, 2). In clinician-taken test samples, there was a complete concordance of the 4 HPV-hr test results in 83 of 106 patients (78%). In the self-test samples, a concordance of the 4 test results was only found in 72 patients (68%).	mentioned in the field to the left.	/	/	Cervista self-test sensitivity: 76%, clinician test: 92%; Aptima self-test sensitivity: 82%, clinician test: 96%).	/	.	/	/	The results of this study indicate that under the circumstances of self-testing HPV test systems differ in test sensitivity and specificity. Self-collected Pap tests can provide a test result with a very high positive predictive value and introduce therapeutic strategies. In order to improve screening strategies, it could be an opportunity to combine HPV and Pap tests in self-taken vaginal sample…	Regarding test sensitivity, the highest difference between self and clinician testing was found in Pap tests (45 vs. 91% HSIL in the detection of CIN3+).	Did they review address - yes clearly focused question Did the authors look for the right type of papers? - can't tell Do you think all the important,relevantstudies wereincluded - yes	Selection Bias: Low Performance Bias: Low Detection Bias: Low Attrition Bias: Low Reporting Bias: Low Other Bias: Low
34	Toshimichi Onuma	Evaluation of the concordance in HPV type between self- and physician-collected samples using a brush-based device and a PCR-based HPV DNA test in Japanese referred patients with abnormal cytology or HPV infection.	2020	Japan	Cross-sectional study	100 participants	Average age was 41.8 years (SD 11.0)	Female patients, Previously tested negative for intraepithelial lesions or malignancy/HPV-positive, Patients with atypical squamous cells of undetermined significance or worse (ASCUS+) cytology	Underwent hysterectomy, Pregnant, Received chemotherapy	No specific information on ethnicity or socio-economic status provided in the article.	does not specify the HPV vaccination status of participants.	Evalyn Brush	Liquid-based cytology	0.5	0.51	Agreement rate between self- and physician-sampling: 88% (κ = 0.76), HPV16/18 showed higher agreement rates than other HPVs (99%, kappa 0.96 and 89%, kappa 0.77, respectively)	The concordance rate of 88% and kappa value of 0.76 indicate statistically significant agreement between the two methods.	Both methods showed 100% sensitivity to CIN2+. Specificity: 57.0% for physician-sampling and 58.1% for self-sampling	PPV: 26.5% for self-sampling, 26.0% for physician-sampling, NPV: 100% for both methods	The article mentions that self-sampling is less awkward and acceptable for screening patients but does not provide specific data on satisfaction.	does not provide specific information on cost effectiveness.	The number of days from self-sampling to HPV testing was 12.7 ± 6.9 days for HPV test-matched cases and 14.2 ± 7.3 days for HPV test-unmatched cases.	The study indicates that self-swab HPV screening is as effective as physician-collected pap smears in detecting HPV and significant cervical abnormalities. Given its high patient acceptability and comparable diagnostic performance, self-swabbing could be a viable alternative for increasing screening rates and early detection of cervical cancer, especially in populations with low screening partici…		CASP Assessment Validity: Clear focus: Yes Acceptable recruitment: Yes Accurate measurement: Yes Some confounders missing: Yes (demographic details like ethnicity and socio-economic status not fully detailed) Results: Precise and believable: Yes Consistent with other evidence: Yes Relevance: Applicable to local population: Yes Implications for practice: Yes	Selection Bias: Low Performance Bias: Low Detection Bias: Low Attrition Bias: Low Reporting Bias: Low Other Bias: Low
35	Olusegun Kayode Ajenifuja	Comparison between self sampling and provider collected samples for Human Papillomavirus (HPV) Deoxyribonucleic acid (DNA) testing in a Nigerian facility.	2018	Nigeria	Cross-sectional study	194 participants	23-75 years (mean 43.4, SD 9.6)	Women presenting for cervical cancer screening	Not explicitly stated in the article	Majority of the participants (86%) were in monogamous marriages; 76.8% had only one lifetime sexual partner	Not specified	Cytobrush (cervexR) cervical cell sampler	Not explicitly stated, but samples were obtained by provider using a cytobrush and were processed using the Hybribio HPV DNA collection kit for HPV DNA test	9.8% (19 out of 194)	6.2% (12 out of 194)	Agreement rate: 93.8%, Kappa statistic: 0.47 (95% CI: 21.3 - 72.3%, P < 0.05)	Moderate correlation between self-sampling and provider sampling techniques (κ = 0.47, P < 0.05)	Sensitivity and specificity not explicitly provided but moderate correlation was observed.	PPV and NPV not explicitly provided.	Not explicitly provided, but self-sampling mentioned as a feasible alternative that may improve screening attendance.	Not provided	Not provided	The study supports the feasibility and effectiveness of self-swab HPV screening as a reliable alternative to provider-collected samples. The high concordance rate and higher detection rate of HPV in self-sampling suggest that it can be an effective method for increasing cervical cancer screening coverage, particularly in settings where traditional screening methods face barriers.		CASP Assessment Validity: Clear focus: Yes Acceptable recruitment: Yes Accurate measurement: Yes Some confounders missing: Yes (demographic details like ethnicity and socio-economic status not fully detailed) Results: Precise and believable: Yes Consistent with other evidence: Yes Relevance: Applicable to local population: Yes Implications for practice: Yes	Selection Bias: Low Performance Bias: Low Detection Bias: Low Attrition Bias: Low Reporting Bias: Low Other Bias: Low
36	Larissa de Melo Kuil	The Role of Self-Collection by Vaginal Lavage for the Detection of HPV and High-Grade Intraepithelial Neoplasia.	2017	Brazil	Cross-sectional study	204 women invited, 171 agreed to participate	18-64 years - 3 people below the age of 21	Women aged 18-64 years with abnormal cervical cytology results (ASCUS or worse)	Not explicitly stated in the article	Majority had a low level of education and low family income (less than BRL 1,000 a month)	Not specified	Vaginal lavage using a syringe and urethral probe	Not explicitly stated but involved conventional collection by a physician using a specific brush for cervical samples	0.291	0.394	Agreement rate: 91.5% for glandular representation Kappa statistic for HPV tests: 0.43 (95% CI: 0.27-0.59)	The HPV positivity rate was significantly lower in self-collected samples compared to conventional collection (p = 0.035)	Sensitivity (Self-sampling): 50.0% (for HPV) Specificity (Self-sampling): 71.7% Sensitivity (Pap smear): 81.5% (for HPV) Specificity (Pap smear): 71.3%	PPV (Self-sampling): 27.8% NPV (Self-sampling): 86.8% PPV (Pap smear): 44.9% NPV (Pap smear): 93.1%	58.8% of participants preferred self-collection Majority found the method easy to perform and not embarrassing	Not provided	Not provided	The study supports the potential of self-swab HPV screening as a supplementary method rather than a replacement for conventional pap smear screening. Although self-sampling is less sensitive and has a lower detection rate, its high acceptability and ease of use make it a viable option for increasing screening coverage. However, due to its limitations in sensitivity and predictive values, self-swa…		Validity: Clear focus: Yes Acceptable recruitment: Yes Accurate measurement: Yes Some confounders missing: Yes (demographic details like ethnicity and socio-economic status not fully detailed) Results: Precise and believable: Yes Consistent with other evidence: Yes Relevance: Applicable to local population: Yes Implications for practice: Yes	Selection Bias: Low Performance Bias: Low Detection Bias: Low Attrition Bias: Low Reporting Bias: Low Other Bias: Low
37	P.J.W. Ketelaars	High-risk human papillomavirus detection in self-sampling compared to physician-taken smear in a responder population of the Dutch cervical screening: Results of the VERA study.	2017	The Netherlands	Cohort study	2049 women	30–60 years	Women aged 30–60 years, participating in the Dutch cervical cancer screening program.	No specific exclusion criteria mentioned, but 316 women were excluded due to not providing a cervical smear or self-sample, and some samples were excluded due to being β-globin negative or having invalid test results.	The study was conducted in the Netherlands; no specific information on ethnicity or socio-economic status is provided.	Not specified in the study.	Evalyn Brush	Liquid-based cytology (ThinPrep in the Nijmegen region and SurePath in the ‘s-Hertogenbosch region)	10.0% (204/2049; 95% CI, 8.7–11.3)	8.0% (163/2049; 95% CI, 6.9–9.2)	Overall concordance between self-samples and physician-taken samples was 96.8%. Proportion of true positive self-samples: 92.6% (151/163; 95% CI, 87.6–95.8). Proportion of true negative self-samples: 97.2% (1833/1886; 95% CI, 96.3–97.8). McNemar test was highly significant (p < 0.000002) indicating proportions are not comparable.	The McNemar test for correlated proportions showed significant differences in the detection rates.	Not explicitly stated, but concordance was 96.8%, with true positive and true negative rates as mentioned above.	Not provided directly in the article.	97.1% of women rated self-sampling as convenient, and 98.5% rated it as user-friendly. 62.8% preferred self-sampling over physician-taken sampling for the next screening round.	Not discussed in the article.	Not mentioned directly in the article, but both methods were compared using the same testing platform, Roche cobas 4800 HPV Test.	The findings from this study suggest that self-swab screening for HPV is a viable and effective alternative to traditional pap smear screening. It offers comparable accuracy, particularly for high-risk HPV types, and is generally preferred by women due to its convenience and user-friendliness. This supports the idea that self-swabbing could be effectively implemented as part of routine cervical c…		Did they review address - yes clearly focused question Did the authors look for the right type of papers? - can't tell Do you think all the important,relevantstudies wereincluded - yes	Selection Bias: Low Performance Bias: Low Detection Bias: Low Attrition Bias: Low Reporting Bias: Low Other Bias: Low
38	K Haguenoer	Accuracy of dry vaginal self-sampling for detecting high-risk human papillomavirus infection in cervical cancer screening: a cross-sectional study.	2014	France	Cross-sectional study	722 women	20 to 65 years	Women due for a routine screening Pap smear, aged 20 to 65, self-reported not a virgin, not pregnant, not vaccinated against HPV, not menstruating, had no Pap smear for at least 2 years, and had no prior hysterectomy​	not meeting the inclusion criteria.	Most women (74.2%) were aged 30 to 65​	All participants were not vaccincated	Dry swab (vsc-DRY) and swab in liquid medium (vsc-LIQ)	The clinician performed a pelvic and speculum examination during which a cervical specimen was collected (ccc-LIQ) as for liquid-based cytology. Ectocervical and endocervical cells were collected with use of a Cervexbrush and were resuspended in a specimen transport liquid medium (Thinprep Paptest, Presercyt solution	vsc-DRY: 24.5% (177/722) vsc-LIQ: 25.5% (184/722)​	20.9% (151/722)​	The Kappa value for the HPV DNA test results between the two self-collected samples (vsc-DRY and vsc-LIQ) was 0.81 (95% CI: 0.76–0.86), indicating a high level of agreement. Between the self-collected (vsc-DRY) and clinician-collected (ccc-LIQ) samples, the Kappa value was 0.76 (95% CI: 0.71–0.82), and between the self-collected (vsc-LIQ) and clinician-collected (ccc-LIQ) samples, it was also goo…	Higher HR-HPV prevalence in self-sampling methods compared to clinician-collected samples (p < 0.0001 for vsc-LIQ and p = 0.0008 for vsc-DRY)​	vsc-DRY: Sensitivity 88.7%, Specificity 92.5% vsc-LIQ: Sensitivity 87.4%, Specificity 90.9%​	Not mentioned	A total of 104 women (14.4%) reported difficulties, and 64 women (8.9%) reported pain or discomfort during self-collection​	The study notes that the dry swab method is cheap and easy to ship, suggesting cost-effectiveness for large-scale screening​	not mentioned	The study concludes that self-collection of vaginal samples using a dry swab is a feasible, accurate, and patient-friendly method for detecting high-risk human papillomavirus (HR-HPV) infections. This method demonstrates a high sensitivity and specificity comparable to clinician-collected samples, with substantial Kappa values indicating a strong agreement. The dry swab technique, being cost-effe…		Did they review address - yes	Selection Bias: Low Performance Bias: Low Detection Bias: Low Attrition Bias: Low Reporting Bias: Low Other Bias: Low
39	Maarit K. Leinonen	Safety and acceptability of human papillomavirus testing of self-collected specimens: A methodologic study of the impact of collection devices and HPV assays on sensitivity for cervical cancer and high-grade lesions.	2018	Norway	Methodologic study	310 women	21 to 80 years	Women referred for treatment of premalignant cervical lesions or with a diagnosis or suspicion of cervical carcinoma​	Of all study participants, 59 patients were not hrHPV tested. We excluded 18 patients because postal services failed to deliver their specimens from the CRN to the laboratory, 32 because of a missing physician-specimen, 8 patients who used one device only, and one cancer patient who was advised to withdraw by her gynecologist	mean age: 38 years	not mentioned	Evalyn®Brush and FLOQSwabs™​	Physician-collected cervical specimen using a brush, rinsed into PreservCyt® buffer for HPV testing and cytopathological evaluation using ThinPrep® 2000 System	Evalyn®Brush: Anyplex™ II HPV28: 209 out of 232 (90.1% positivity rate) Cobas® 4800: 196 out of 232 (84.5% positivity rate) Xpert® HPV: 197 out of 232 (84.9% positivity rate) FLOQSwabs™: Anyplex™ II HPV28: 193 out of 232 (83.2% positivity rate) Cobas® 4800: 185 out of 232 (79.7% positivity rate) Xpert® HPV: 188 out of 232 (81.0% positivity rate)	Anyplex™ II HPV28: 207 out of 232 (89.2% positivity rate) Cobas® 4800: 200 out of 232 (86.2% positivity rate) Xpert® HPV: 199 out of 232 (85.8% positivity rate)	Kappa values: Evalyn®Brush: 0.68 (95% CI: 0.52–0.83) with Anyplex™, 0.64 (95% CI: 0.49–0.77) with Cobas®, and 0.66 (95% CI: 0.52–0.80) with Xpert®HPV​ FLOQSwabs™: 0.50 (95% CI: 0.33–0.64) with Anyplex™, 0.60 (95% CI: 0.44–0.73) with Cobas®, and 0.60 (95% CI: 0.45–0.73) with Xpert®HPV​	Evalyn®Brush: No significant difference in sensitivity between Evalyn®Brush and physician-collected specimens (p = 0.727 with Anyplex™, p = 0.146 with Cobas®, and p = 0.146 with Xpert®HPV)​ FLOQSwabs™: Significant difference in sensitivity between FLOQSwabs™ and physician-collected specimens (p < 0.001 with Anyplex™, p = 0.001 with Cobas®, and p = 0.002 with Xpert®HPV)​	Sensitivity for CIN3+ Anyplex™ II HPV28: Physician-collected: 95.6% Evalyn®Brush: 94.5% FLOQSwabs™: 87.4% Cobas® 4800: Physician-collected: 94.0% Evalyn®Brush: 90.7% FLOQSwabs™: 86.3% Xpert® HPV: Physician-collected: 94.5% Evalyn®Brush: 91.2% FLOQSwabs™: 87.9% Sensitivity for Invasive Carcinoma Anyplex™ II HPV28: Physician-collected: 93.3% Evalyn®Brush: 91.1% FLOQSwabs™: 86.7% Cobas® 4800: Physic…	not mentioned	88% of participants considered self-collection to be a good alter- native for physician-collection, although 84% of women had more confidence in physicians. Overall, 87% of women reported self-collec- tion to be more convenient than visiting a physician.	not mentioned directly	Self-specimens were preprocessed within an average of six days after being sent to the laboratory	The study emphasizes that human papillomavirus (HPV) DNA detection in self-collected specimens is a viable alternative to traditional physician-collected methods for cervical cancer screening. The performance of self-collection, when using validated devices and protocols, shows comparable effectiveness to that of the physician-collected samples in detecting high-grade cervical lesions and invasiv…		Did they review address - yes	Selection Bias: Low Performance Bias: Low Detection Bias: Low Attrition Bias: Low Reporting Bias: Low Other Bias: Low
40	Pattiya Nutthachote	Comparison of detection rate of high risk HPV infection between self-collected HPV testing and clinician-collected HPV testing in cervical cancer screening.	2019	thailand	Cross-sectional study	400 women	Age (mean ± SD): 46.48 ± 11.6 years	Women attending routine cervical cancer screening at King Chulalongkorn Memorial Hospital between January 1, 2015, and May 31, 2015​	History of hysterectomy, cervical cancer, previous radiation therapy, or chemotherapy​	Age (mean ± SD): 46.48 ± 11.6 years Last Pap smear: Never (25.75%), <2 years (60.5%), 2-5 years (10.75%), >5 years (3%)​	not mentioned	Self-collected vaginal samples using a brush-type collecting system (QIAGEN Gaithersburg, Inc.)​	Liquid-based cytology with broom-type cervical brush (Surepath®)​	10 %	7.5 %	Kappa agreement for HPV detection between methods: 0.73​	not specified	Not specified but they mentioend this "we found that self-collected HPV DNA testing had a high sensitivity for high grade lesion detection (100%)"	not mentioend	The study implies acceptability by mentioning increased coverage and potential use of self-sampling in populations avoiding clinician collection​	not mentioend	not mentioned	The study concluded that self-collected HPV testing offers a viable and effective alternative to traditional clinician-collected methods for cervical cancer screening. The study demonstrated that the detection rate of high-risk HPV DNA was slightly higher in the self-sampling group (10.0%) compared to the clinician-collected group (7.5%), with a Kappa agreement of 0.73, indicating substantial con…		Did they review address - yes	Selection Bias: Low Performance Bias: Low Detection Bias: Low Attrition Bias: Low Reporting Bias: Low Other Bias: Low
41	Hye Young Shin	Evaluation of satisfaction with three different cervical cancer screening modalities: clinician-collected Pap test vs. HPV test by self-sampling vs. HPV test by urine sampling.	2019	korea	Questionnaire-based survey study	732 women	20 to 69 years	Not specified	Women with a history of hysterectomy, cervical cancer, or who were menstruating at the time of recruitment	Age: 50.6% were 20–49 years old, and 49.5% were 50–69 years old. Education: 53.0% had a university education or more Marital Status: 90% were married Regular Medical Check-ups: 18.0% had regular medical check-ups Age at First Intercourse: Mean age was 24.2±3.77 years​ Supplemental Medical Insurance: 85.9% had insurance for cancer	not mentioned	Self-collected vaginal sampling using a dry, cone-shaped flocked swab (FLOQswabs)	Clinician-collected Pap test	"Because of the low rates of abnormal cytology (3 cases of atypical squamous cells-undetermined significance), we only identified that the detection rate of HPV 16/18 was 2.0% for vaginal self -sampling and 1.5% for urine sampling"	not mentioned. Study foucsed on the satisfaction of tests.	Satisfaction: Higher satisfaction reported for self-sampling and urine sampling compared to the Pap test (Odds Ratio [OR] for self-sampling = 2.01, 95% CI = 1.48–3.00; OR for urine sampling = 2.47, 95% CI = 1.75–3.48)​(48. jgo-30-e76)​. Psychological distress was significantly lower in the self-sampling and urine sampling groups compared to the Pap test group​	All p-values < 0.05 were considered statistically significant. Differences in satisfaction and distress were statistically significant among the three modalities​	not specified	not mentioned	Higher satisfaction for self-sampling and urine sampling (self-sampling 93.4%, urine sampling 94.4%) compared to Pap test (87.2%)​ Lower psychological distress with self-sampling and urine sampling than with Pap test​	not mentioned	not mentioned	The study concluded that self-sampling and urine sampling for human papillomavirus (HPV) testing were associated with higher satisfaction and lower psychological distress compared to the traditional clinician-collected Pap test. The findings suggest that these alternative methods could improve participation rates in cervical cancer screening by alleviating the psychological and practical burdens …		Did they review address - yes	Selection Bias: Low Performance Bias: Low Detection Bias: Low Attrition Bias: Low Reporting Bias: Low Other Bias: Low
42	Thannaporn Kittisiam	Clinical Performance of Self-collected Specimen HPV-DNA vs Clinician- collected Specimen HPV-mRNA to Detect High-risk HPV and High-grade Cervical Lesions and Cancer.	2024	Thailand	prospective clinical trial	494 women	18 years and older	Women with abnormal cervical cytology and/or positive high-risk HPV who attended colposcopy clinics in Bangkok, Thailand.	Pregnant women Diagnosed with cervical cancer Previous treatment with hysterectomy, radiation therapy, or chemotherapy Active bleeding or use of vaginal douching within 48 hours before collecting the specimen	Mean age: 39.28 ± 11.36 years 67.4% married 71.0% have education bachelor’s degree or higher 65.6% have a family income over 24,000 THB per month (672 USD) 85.8% pre-menopausal	87.7% had never received HPV vaccination	Self-collected specimen tools from the Aptima Multitest Swab Specimen Collection Kit	Clinician-collected specimen using ThinPrep specimen collection kit for mRNA testing (APTIMA® HPV assay)	74.7% positive high-risk HPV Positive for 16, 18: 31.4%	70.4% positive high-risk HPV Positive for 16, 18: 25.1%	Concordance rate: 86.8% Kappa: 0.670 (95% CI: 0.599-0.746)	P value < 0.001 for high-risk HPV detection	Sensitivity of self-sampling: 91.8% (95% CI: 85.4%-96.0%) Sensitivity of Pap smear: 90.2% (95% CI: 83.6%-94.9%)	NPV of self-sampling: 91.9% (95% CI: 85.6%-96.0%) NPV of Pap smear: 91.7% (95% CI: 86.0%-95.7%)	not mentioned	not mentioned	not mentioned	The study concludes that self-swab screening for HPV is nearly as effective as clinician-collected Pap smears, with similar detection rates for high-risk HPV (74.7% for self-swabs and 70.4% for clinician samples) and high concordance (86.8%). Sensitivity and negative predictive values for detecting high-grade cervical lesions are comparable between the two methods, indicating that self-sampling i…		CASP Assessment Validity: Clear focus: Yes Acceptable recruitment: Yes Accurate measurement: Yes Some confounders missing: Yes (demographic details like ethnicity and specific socio-economic status not fully detailed) Results: Precise and believable: Yes Consistent with other evidence: Yes Relevance: Applicable to local population: Yes Implications for practice: Yes	Cochrane ROB Assessment Selection Bias: Low Performance Bias: Low Detection Bias: Low Attrition Bias: Low Reporting Bias: Low Other Bias: Low
43	A Leeman	HPV testing in first-void urine provides sensitivity for CIN2+ detection comparable with a smear taken by a clinician or a brush-based self-sample: cross-sectional data from a triage population.	2017	Spain	Cross-sectional single-centre study	91 women	18 to 60 years	Women referred for colposcopy to the Hospital Clínic, Barcelona, Spain, because of abnormal cervical cytology	not direclty menitoned	not specified in text	not mentioned	Brush-based self-sample using the Evalyn Brush™	Clinician-taken smear using Cervex-Brush and ThinPrep liquid-based cytology	For self-sampling: 66 positive using SPF10 59 positive using GP5+/6+ Note: "SPF10 and GP5+/6+ are two types of primers used in polymerase chain reaction (PCR) testing for the detection of human papillomavirus (HPV)."	For clinician-taken samples: 68 positive using SPF10 62 positive using GP5+/6+	Kappa values: for SPF10: 0.81 (CTS), 0.82 (SS), 0.77 (U1), 0.74 (U2) for GP5+/6+: 0.81 (CTS), 0.82 (SS), 0.77 (U1), 0.74 (U2)	P-values for kappa agreements: 0.125 (CTS), 0.016 (SS), 0.039 (U1), 0.002 (U2)	Sensitivity for CIN2+ detection: For SPF10: 100% (CTS and SS) For GP5+/6+: 95% (all) Specificity for CIN2+ For SPF10: 33% (CTS) and 35% (SS) For GP5+/6+: 39% (CTS) and 43% (SS)	not mentioend	A total of 82 women (90.1%) rated the convenience of the SS compared with CTS as good to excellent, and 81 women (89.0%) rated the urine sampling as good to excellent compared with CTS. Two women rated the convenience of SS com- pared with CTS as poor.	not mentioned	not mentioned	The study concludes that HPV testing using first-void urine samples offers sensitivity for detecting CIN2+ lesions comparable to clinician-taken smears and brush-based self-sampling, with no significant differences among the methods. Both the SPF10 and GP5+/6+ assays demonstrated high sensitivity (95-100%) across all sample types. The study highlights the potential of first-void urine sampling as…		Validity: Clear focus: Yes Acceptable recruitment: Yes Accurate measurement: Yes Some confounders missing: Yes (demographic details like ethnicity and socio-economic status not fully detailed) Results: Precise and believable: Yes Consistent with other evidence: Yes Relevance: Applicable to local population: Yes Implications for practice: Yes	Cochrane ROB Assessment Selection Bias: Low Performance Bias: Low Detection Bias: Low Attrition Bias: Low Reporting Bias: Low Other Bias: Low
44	Alan J. Rosenbaum	Acceptability of self-collected versus provider-collected sampling for HPV DNA testing among women in rural El Salvador	2014	El Salvador	Cross-sectional study	518 women	30 to 49 years	Women aged 30-49 years Not pregnant Able to provide informed consent No history of cryotherapy, loop electrosurgical excision procedure, or hysterectomy	not meeting the inclusion criteria.	Majority aged 30-39 years (59.3%) 57.3% had only an elementary school education 51.2% married, 28% living with a partner 62.7% lived in households of six or more people	not mentioned	CareHPV system	Provider-collected cervical sample using a speculum exam	not mentioned	not mentioned	38.8% preferred self-collection, 31.9% preferred provider collection, 29.3% had no preference	Self-collection preference was associated with prior tubal ligation, HPV knowledge, future self-sampling preference, and future home-screening preference (P b 0.05)	not mentioned	not mentioned	Reasons for self-collection preference included privacy/embarrassment, ease, and less pain; reasons cited for provider-collection preference were result accuracy and provider knowledge/experience.	not mentioned	not mentioned	The study concludes that self-sampling for HPV DNA testing is an acceptable method among women in rural El Salvador, with 38.8% of participants preferring self-collection over provider-collected samples. Factors such as privacy, ease, and reduced discomfort contributed to the preference for self-sampling. The study suggests that offering self-sampling could increase participation in cervical canc…		CASP Assessment Validity: Clear focus: Yes Acceptable recruitment: Yes Accurate measurement: Yes Some confounders missing: Yes (detailed demographic factors like socio-economic status not fully explored) Results: Precise and believable: Yes Consistent with other evidence: Yes Relevance: Applicable to local population: Yes Implications for practice: Yes	Cochrane ROB Assessment Selection Bias: Low Performance Bias: Low Detection Bias: Low Attrition Bias: Low Reporting Bias: Low Other Bias: Moderate (some limitations in generalizability due to study being conducted in a specific rural area)
45	Rosa Catarino	Feasibility of At-Home Self-Sampling for HPV Testing as an Appropriate Screening Strategy for Nonparticipants in Switzerland: Preliminary Results of the DEPIST Study	2015	Switzerland	Preliminary Results of the DEPIST Study ( which is a cross-sectional study)	158 women	25 to 69 years	Women aged 25-69 years Never participated in a cervical cancer screening program or not had a screening test in the previous 3 years	Pregnant women Women with a previous hysterectomy	Mean age: 43.6 years Nationalities: 39.8% European, 17.7% Swiss, 36.7% Latin American Employment: 75.7% employed, 17.2% unemployed Health insurance coverage: 70.7% insured, 29.3% uninsured	not mentioned	ESwab (Copan, Brescia, Italy) for at-home self-sampling	Not directly compared in this study	Not applicable in this study	Not applicable in this study	Odds ratio for willingness to use Self-HPV due to lack of time: OR = 6.16, 95% CI = 1.61–23.60, p = 0.008 Odds ratio for satisfaction with self-sampling kit: OR = 22.59, 95% CI = 1.74–293.30, p = 0.017 Odds ratio for self-sampling kit's adequacy: OR = 12.15, 95% CI = 1.28–114.98, p = 0.029 Women who experienced pain during self-sampling had higher odds of having had a previous negative experience…	The study found statistically significant associations for predictors of willingness to participate in a Self-HPV screening program and the risk of experiencing pain during self-sampling. Significant predictors include lack of time for attending traditional screenings, satisfaction with the self-sampling kit, adequacy of the kit, and previous negative experiences with screening.	not mentioned	not mentioned	One hundred six women (82%) preferred the Self-HPV because it is easy to perform, convenient,	not direclty menioned	not mentioned	The study concludes that at-home self-sampling for HPV testing is a feasible and acceptable strategy for increasing cervical cancer screening participation among women in Switzerland who do not attend traditional screening programs. The majority of participants preferred self-sampling due to its convenience, privacy, and ease of use. Significant predictors of willingness to use self-sampling incl…		CASP Assessment Validity: Clear focus: Yes Acceptable recruitment: Yes Accurate measurement: Yes Some confounders missing: Yes (detailed demographic factors like socio-economic status not fully explored) Results: Precise and believable: Yes Consistent with other evidence: Yes Relevance: Applicable to local population: Yes Implications for practice: Yes	Cochrane ROB Assessment Selection Bias: Low Performance Bias: Low Detection Bias: Low Attrition Bias: Low Reporting Bias: Low Other Bias: Moderate (small sample size and potential selection bias due to self-recruitment)
46	Max Chernesky	Evaluation of a New APTIMA Specimen Collection and Transportation Kit for High-Risk Human Papillomavirus E6/E7 Messenger RNA in Cervical and Vaginal Samples	2014	Canada	Cross-sectional study	580 women	18 to 63 years	Women referred to a colposcopy clinic due to previous abnormal cytology or positive HPV results	not mentioned	Mean age: 39 years	not mentioned	APTIMA specimen collection and transportation (SCT) kit for self-collected vaginal samples	Liquid-based cytology (PreservCyt and SurePath)	not directly mentioned	not directly mentioned	Agreement between cervical SCT and PreservCyt: 91.1% (κ = 0.82) Agreement between cervical SCT and SurePath: 86.7% (κ = 0.72) Agreement between self-collected vaginal SCT and physician-collected SCT: 84.7% (κ = 0.68) Agreement between self-collected vaginal SCT and cervical SCT: 82.0% (κ = 0.63)	Sensitivity of cervical SCT to self-collected vaginal SCT (P = 0.014) and to physician-collected vaginal SCT (P = 0.046), to PreservCyt (P = 0.317), and to SurePath (P = 0.157).	Cervical Samples: PreservCyt: Sensitivity: 96.6% (95% CI: 82.8–99.4) Specificity: 66.2% (95% CI: 62.1–70.1) Cervical SCT: Sensitivity: 100% (95% CI: 88.7–100) Specificity: 59.8% (95% CI: 55.6–63.8) SurePath: Sensitivity: 93.3% (95% CI: 78.7–98.2) Specificity: 70.9% (95% CI: 66.9–74.5) Vaginal Samples: SCT (self-collected): Sensitivity: 86.7% (95% CI: 70.3–94.7) Specificity: 60.1% (95% CI: 55.9–64…	Cervical Samples: PreservCyt PPV: 13.3% (95% CI: 9.4–18.6) NPV: 99.7% (95% CI: 98.4–100) Cervical SCT: PPV: 12.1% (95% CI: 8.6–16.7) NPV: 100% (95% CI: 98.8–100) SurePath: PPV: 14.9% (95% CI: 10.5–20.7) NPV: 99.5% (95% CI: 98.2–99.9) Vaginal Samples: SCT (self-collected): PPV: 10.7% (95% CI: 7.4–15.3) NPV: 98.8% (95% CI: 96.9–99.5) SCT (physician-collected): PPV: 12.2% (95% CI: 8.3–17.5) NPV: 98.…	A total of 563 women completed the questionnaire, which demonstrated that more patients found the 5 steps in- volved in self-collecting a vaginal sample to be very easy or easy (94.7%Y100%) compared with very difficult or difficult (0%Y5.3%). Only 5.3% reported some difficulty in collecting the sample, and 87.6% reported no discomfort compared with 12.4% who expressed some discomfort during the c…	not mentioned	not mentioned	The findings demonstrate that cervical samples collected with the SCT kit show superior sensitivity (100%) compared to traditional liquid-based cytology methods like PreservCyt (96.6%) and SurePath (93.3%). Although vaginal samples show lower sensitivity than cervical ones, the SCT kit still performs relatively well, with self-collected vaginal samples achieving 86.7% sensitivity and physician-co…		CASP Assessment Validity: Clear focus: Yes Acceptable recruitment: Yes Accurate measurement: Yes Some confounders missing: Yes (potential biases related to patient selection and sample handling not fully detailed) Results: Precise and believable: Yes Consistent with other evidence: Yes Relevance: Applicable to local population: Yes Implications for practice: Yes	Cochrane ROB Assessment Selection Bias: Low Performance Bias: Low (but potential unblinding issues are not discussed) Detection Bias: Low Attrition Bias: Low Reporting Bias: Low Other Bias: Moderate (small sample size for CIN2+ subgroup could affect generalizability)
47	Runzhi Wang	Performance and acceptability of self-collected human papillomavirus testing among women living with HIV	2020	United States	Cross-sectional study	70 participants	30-66 years (median age 50 years, IQR 41-56 years)	Women living with HIV (WLHIV) aged 30 years or older undergoing a Pap test with HPV DNA testing as part of routine care	Pregnant women, women with a hysterectomy, and those with genital tract cancer	Ethnicity: 92.9% Black, 7.1% Non-Black	Not specified	Cytobrush (Aptima cytobrush for mRNA collection)	Clinician-collected HPV mRNA test and DNA test	63% of participants had at least one positive HPV test	Clinician-collected HPV mRNA test was used as the comparator	Sensitivity of self-collected HPV test: 84.6% (95% CI 65.1–95.6%) Specificity of self-collected HPV test: 62.9% (95% CI 44.9–78.5%) Kappa statistic (agreement between self-collected and clinician-collected tests): 0.5 (95% CI 0.2–0.7)	The agreement between the two HPV mRNA tests was moderate, with a p-value of 0.049 indicating marginal significance.	Sensitivity: 84.6% for self-sampling Specificity: 62.9% for self-sampling	PPV: 62.9% NPV: 84.6%	High acceptability: 79% found self-collection easy, and 90% found it convenient and comfortable. 86% would recommend it to family and friends.	Not provided	Not provided	The study indicates that self-swab HPV screening is a viable option for women living with HIV, offering good sensitivity and high patient acceptability. However, the moderate specificity and agreement with clinician-collected samples suggest that it should complement rather than replace traditional screening methods. This aligns with the systematic review’s goal of evaluating the effectiveness of…		Validity: Clear focus: Yes Acceptable recruitment: Yes Accurate measurement: Yes Some confounders missing: Yes (socio-economic status and full demographic details not fully provided) Results: Precise and believable: Yes Consistent with other evidence: Yes Relevance: Applicable to local population: Yes Implications for practice: Yes	Selection Bias: Low Performance Bias: Low Detection Bias: Low Attrition Bias: Low Reporting Bias: Low Other Bias: Low
48	Andrea C. Des Marais	Self-Collection by Mail to Test for Human Papillomavirus and Sexually Transmitted Infections	2018	United States	Observational study	193 women	30-63 years (median age 45 years)	Women aged 30-64 years, overdue for cervical cancer screening (no Pap test in the past 4 years), low-income (household income below 250% of the poverty level), uninsured, underinsured, or with Medicaid insurance	Pregnant women, women with a hysterectomy, or genital tract cancer	Ethnicity: 45% White, 26% Black, 26% Hispanic, 4% Other Socio-economic status: 74% living at or below 100% of the federal poverty level	Not specified	Viba brush used for cervicovaginal sample self-collection	Liquid-based cytology performed on clinician-collected samples	12.4% (home-collected samples)	11.4% (clinician-collected samples)	Kappa agreement between self-home and clinician samples for high-risk HPV: 0.66	Statistical significance: No significant difference in HPV detection between self-home and clinician samples (p=0.79)	Sensitivity for CIN2+ detection: 100% for both self-home and clinician samples Specificity for CIN2+: 91.1% for self-home samples, 92.2% for clinician samples	PPV: Not explicitly provided NPV: High due to the high sensitivity for CIN2+	96.3% of participants were willing to use self-collection again 93.6% found the instructions easy to understand	Not provided	Not provided	The study supports the effectiveness of self-swab HPV screening as a reliable and acceptable alternative to clinician-collected samples. With comparable detection rates, high sensitivity, and strong participant acceptability, self-swab screening can be an effective method for increasing cervical cancer screening coverage, especially among women who are less likely to attend in-clinic screenings. …		Validity: Clear focus: Yes Acceptable recruitment: Yes Accurate measurement: Yes Some confounders missing: Yes (socio-economic status was addressed, but other potential confounders like health literacy were not fully explored) Results: Precise and believable: Yes Consistent with other evidence: Yes Relevance: Applicable to local population: Yes Implications for practice: Yes	Selection Bias: Low Performance Bias: Low Detection Bias: Low Attrition Bias: Low Reporting Bias: Low Other Bias: Low
49	Paul C. Adamson	Acceptability and Accuracy of Cervical Cancer Screening Using a Self-Collected Tampon for HPV Messenger-RNA Testing among HIV-Infected Women in South Africa	2015	South Africa	Cross-sectional study	325 women	Median age 41.6 years (IQR: 34.9–47.5)	HIV-infected women, 25 years or older, without a cervical cytology test result documented in their chart within the past three years.	Women with a hysterectomy, currently menstruating, or with a history of cervical cancer.	Ethnicity: Not explicitly stated, but the study was conducted in South Africa, a region with a diverse population. Socio-economic status: Monthly income ranged from 1000 to 3000 ZAR, with 4.6% having no education and 63.4% having incomplete education up to 12th grade.	Not specified	Tampon-based self-collection for HPV mRNA testing	ThinPrep liquid-based cytology performed on clinician-collected samples	0.435	0.367	Sensitivity of tampon-based self-sampling: 77.4% (95% CI: 69.8%–85.0%) Specificity of tampon-based self-sampling: 77.7% (95% CI: 71.9%–83.6%) Kappa agreement: 0.54 (95% CI: 0.44–0.63)	-	Sensitivity: 77.4% for self-sampling Specificity: 77.7% for self-sampling	PPV: Not explicitly provided NPV: Not explicitly provided	High acceptability: Over 90% of women reported no difficulties with self-collection, and 82% were willing to perform tampon collection at home.	Not provided	Not provided	The study supports the effectiveness and acceptability of self-swab HPV screening using a tampon-based method as a viable alternative to clinician-collected samples. While self-sampling may not be as precise as clinician collection, its comparable detection rates and high patient acceptability make it a promising option for increasing screening coverage, particularly in low-resource settings and …		Validity: Clear focus: Yes Acceptable recruitment: Yes Accurate measurement: Yes Some confounders missing: Yes (socio-economic status was addressed, but other potential confounders like health literacy and sexual behavior were not fully explored) Results: Precise and believable: Yes Consistent with other evidence: Yes Relevance: Applicable to local population: Yes Implications for practice: Yes	Selection Bias: Low Performance Bias: Low Detection Bias: Low Attrition Bias: Low Reporting Bias: Low Other Bias: Low
50	Roosmarijn Luttmer	FAM19A4 methylation analysis in self-samples compared with cervical scrapes for detecting cervical (pre)cancer in HPV-positive women	2016	Netherlands	Prospective observational multicentre cohort study	450 women	18 to 70 years	Women visiting gynecological outpatient clinics, hrHPV-positive on cervicovaginal lavage, no history of treatment for cervical dysplasia or cancer, not currently pregnant or lactating​	not meeting the inclusion criteria.	not specified in text	not reported	Delphi screener used for self-collected cervicovaginal lavage​	Cervex-Brush or Medscand Cytobrush Plus for cervical scrapes collected by a physician​	not mentioned	not mentioned	--	--	The sensitivity of FAM19A4 methylation in self-samples was slightly lower, and specificity was higher compared to physician-collected cervical scrapes​	--	--	--	--	The study evaluates the efficacy of FAM19A4 methylation analysis in self-samples compared with physician-collected cervical scrapes for detecting cervical (pre)cancer in HPV-positive women. It demonstrates that while the sensitivity of methylation detection in self-samples is slightly lower, the specificity is higher compared to physician-collected samples. This suggests that self-sampling can be…		CASP Assessment Validity: Clear focus: Yes Acceptable recruitment: Yes Accurate measurement: Yes Some confounders missing: Yes (lack of detailed demographic data might influence the generalizability of the findings) Results: Precise and believable: Yes Consistent with other evidence: Yes Relevance: Applicable to local population: Yes Implications for practice: Yes	Cochrane ROB Assessment Selection Bias: Low Performance Bias: Low Detection Bias: Low Attrition Bias: Low Reporting Bias: Low Other Bias: Moderate (potential bias due to self-selection of participants who are willing to do self-sampling)
51	Caroline Hellsten	Equal prevalence of severe cervical dysplasia by HPV self-sampling and by midwife-collected samples for primary HPV screening: a randomized controlled trial	2021	Sweden	Randomized Controlled Trial (RCT)	29,604 women (14,765 in the self-sampling group and 14,839 in the midwife-collected group)	30-64 years	Women aged 30-64 years, residents of Region Skåne, Sweden, and scheduled for routine cervical cancer screening.	Women aged 40-42 were excluded from the self-sampling group as they were recommended to undergo both HPV and cytology testing according to national guidelines.	Ethnicity: Not explicitly stated, but the study was conducted in a predominantly Swedish population. Socio-economic status: Not explicitly stated.	Not specified	Multitest Swab Specimen Collection kit (Hologic)	Midwife-collected cervical samples for liquid-based cytology (LBC)	17.1% (95% CI, 16.1–18.23%)	4.5% (95% CI, 4.0–5.0%)	Prevalence of severe dysplasia (HSIL or AIS) was 0.48% in the self-sampling group and 0.47% in the midwife-collected group, showing no significant difference between the two methods. The study indicates non-inferiority of self-sampling compared to midwife-collected samples in detecting severe dysplasia.	No statistically significant difference was found between the self-sampling and midwife-collected groups in detecting severe dysplasia.	Not explicitly provided in the article, but the non-inferiority of self-sampling suggests comparable sensitivity and specificity to midwife-collected samples.	PPV for detecting severe dysplasia in the self-sampling group was 22.2%, while in the midwife-collected group it was 15.6%. NPV was not explicitly provided.	Participation in the self-sampling group was lower (33.5%) compared to the midwife-collected group (47.5%). High compliance (91.2%) for clinical follow-up among HPV-positive women in the self-sampling group.	The article mentions that self-sampling is cost-effective, time-saving, and convenient, but specific cost-effectiveness data is not provided.	The article does not provide specific data on the time to receive results.	The study supports the effectiveness of self-swab HPV screening as a reliable and non-inferior alternative to midwife-collected samples for detecting severe cervical dysplasia. With higher HPV detection rates and comparable outcomes in identifying high-grade lesions, self-sampling offers a promising option for expanding cervical cancer screening, particularly in populations where traditional scre…		Validity: Clear focus: Yes Acceptable recruitment: Yes Accurate measurement: Yes Some confounders missing: Yes (socio-economic status and health literacy were not fully explored) Results: Precise and believable: Yes Consistent with other evidence: Yes Relevance: Applicable to local population: Yes Implications for practice: Yes	Selection Bias: Low Performance Bias: Low Detection Bias: Low Attrition Bias: Low Reporting Bias: Low Other Bias: Low
52	Inger Gustavsson	Detection of CIN2+ by Self-Sampling and HPV Testing: A Randomized Study in Uppsala County	2017	Sweden	Randomized Controlled Trial (RCT)	17,997 women in the HPV arm (self-sampling) and 18,393 women in the control arm (Pap smear cytology)	30-49 years	Women aged 30-49 years, no previous hysterectomy, no current pregnancy, and no clinical test results relating to cervical cancer registered within 1 year before the date of invitation.	Not specifically mentioned beyond the opposite of the inclusion criteria	Ethnicity: Not explicitly stated, but the study was conducted in Sweden, likely involving a predominantly Swedish population. Socio-economic status: Not explicitly stated.	Not specified	Self-sampling of vaginal fluid (VF) using an FTA card, tested for HPV.	Conventional Pap smear cytology performed by midwives.	6.3% HPV positive in the first test.	Not directly comparable, focus was on the detection of CIN2+.	Cumulative prevalence of CIN2+ per 1000 years screened was about six times higher in the HPV arm (160.8) compared to the control arm (25.4), a statistically significant difference.	The difference in cumulative prevalence of CIN2+ between the self-sampling and control arms was statistically significant.	Not directly reported, but the higher detection rate of CIN2+ in the self-sampling group suggests good sensitivity.	Not explicitly provided.	Not discussed in detail	Not provided.	Not provided.	The study strongly supports the effectiveness of self-swab HPV screening as a superior alternative to traditional Pap smears in detecting high-grade cervical lesions (CIN2+). With its higher detection rate and potential for broad implementation, self-sampling could play a critical role in improving cervical cancer screening coverage and outcomes, aligning well with the objectives of the systemati…		Validity: Clear focus: Yes, the study aimed to assess the detection of CIN2+ by comparing self-sampling with HPV testing to traditional Pap smear cytology. Acceptable recruitment: Yes, the recruitment process was based on clear inclusion and exclusion criteria. Accurate measurement: Yes, the outcomes were measured using validated methods for HPV testing and cytology. Some confounders missing: Yes…	Selection Bias: Low, as the study used randomization to allocate participants to self-sampling and control groups. Performance Bias: Low, since the study ensured blinding where possible, and the outcome measures were objective. Detection Bias: Low, as the outcome assessment was consistent and based on standardized HPV testing methods. Attrition Bias: Low, the study had a large sample size and mai…
53	Misuzu Fujita	Effectiveness of self-sampling human papillomavirus test on precancer detection and screening uptake in Japan: The ACCESS randomized controlled trial	2024	japan	randomized controlled trial	A total of 7337 and 7772 women were assigned to the intervention and control groups, respectively.	Women between 30 and 58 years	Women between 30 and 58 years old who did not participate in the cervical cancer screening program for ≥3 years were eligible	not specified	japanese women	not specified	Evalyn Brush (Evalyn® Rovers Medical Devices® BV) for HPV self-sampling	not specified	0.7	0.5	The risk ratio and risk difference were 1.32 (95% CI: 0.36, 4.93) and 0.2(95% CI: 0.6, 0.9), respectively.		75% in the intervention group and 92.9% in the control group	PPVs in the intervention group was 38.5% and in the control group was 28.6%.	Not discussed in detail	Not provided	3-5 years	This is the first randomized controlled trial to show that incorporating a self-sampling HPV test into a cervical cancer program improves screening uptake in Japan. However, CIN2+ detection did not differ between the two groups. The main reason for this is the low compliance rate for cytology triage in HPV-positive or HPV-invalid women.		Validity: Clear focus: Yes Acceptable recruitment: Yes Accurate measurement: Yes Some confounders missing: Yes (potential biases related to patient selection and sample handling not fully detailed) Results: Precise and believable: Yes Consistent with other evidence: Yes Relevance: Applicable to local population: Yes Implications for practice: Yes	Selection Bias: Low Performance Bias: Low Detection Bias: Low Attrition Bias: Low Reporting Bias: Low Other Bias: Low
54	Anna Gottschlich	Acceptability of Human Papillomavirus Self-Sampling for Cervical Cancer Screening in an Indigenous Community in Guatemala	2017	Guatemala	randomized controlled trial	202 indigenous women	18-60	Not specified	not specified	indigenous people	not specified	EveMedical HerSwab self-collection HPV kits	not specified	not mentioned	not mentioned	not specifically mentioned	not specifically mentioned	not explictly provided	not explictly provided	80.2% preferred self sampling, and 79% found self sampling to be more comfortable		Not provided	HPV testing by using self-collected samples was well accepted, suggesting that it is a plausible modality for cervical cancer screening in indigenous communities.		Validity: Clear focus: Yes Acceptable recruitment: Yes Accurate measurement: Yes Some confounders missing: Yes (demographic details like ethnicity and socio-economic status not fully detailed) Results: Precise and believable: Yes Consistent with other evidence: Yes Relevance: Applicable to local population: Yes Implications for practice: Yes	Selection Bias: Low
55	Joel C. Boggan	Vaginal Self-Sampling for Human Papillomavirus Infection as a Primary Cervical Cancer Screening Tool in a Haitian Population	2015	Haiti	Cross-sectional study	1845 women screened, with final analyses performed on 366 HR-HPV-positive women who underwent biopsy	Median age of participants was 41 years (IQR: 34-48 years)	Women aged 25-65 years Had engaged in vaginal intercourse at least once during their lifetime	Current pregnancy Prior hysterectomy Active menstruation	Median age of sexual debut: 19 years Median number of lifetime sexual partners: 2.5 Median number of pregnancies: 4.1 51% married, 29.1% unmarried but living with a partner​	Not reported	Vaginal self-sampling with a Dacron brush provided by QIAGEN	Clinician-collected cervical sample using a Dacron brush			Concordance rate between vaginal and cervical samples: 91.4% Kappa statistic (κ): 0.73, indicating good agreement between the two sampling methods	P < 0.001 for agreement between vaginal and cervical samples	Sensitivity for detecting ≥CIN-II: 87.5% for vaginal swabs vs. 96.9% for cervical swabs Sensitivity for detecting ≥CIN-I: 89.1% for vaginal swabs vs. 87.9% for cervical swabs	PPV for detecting ≥CIN-II: 8.8% for vaginal swabs vs. 10.6% for cervical swabs	not mentioned	not mentioned	not mentioned	The study demonstrates that self-sampling for high-risk HPV using vaginal swabs in a Haitian population is a feasible alternative to clinician-collected cervical samples for cervical cancer screening. The agreement between the two sampling methods was high, with a kappa value of 0.73. Both methods showed similar sensitivities for detecting ≥CIN-I and ≥CIN-II lesions. The study suggests that vagin…		Did they review address - yes	Selection Bias: Low Performance Bias: moderate Detection Bias: Low Attrition Bias: moderate Reporting Bias: Low Other Bias: Low
56	Manuela Viviano	Self-sampling to Improve Cervical Cancer Screening Coverage in Switzerland: A Randomised Controlled Trial	2017	Switzerland	RCT	667 eligible women were enrolled (331 in the control group and 336 in the intervention group)	25-69 years (mean age 42 years)	Women aged 25-69 years who had not undergone cervical cancer screening in the last 3 years	Pregnancy or previous hysterectomy	81% of participants in the control group and 82.4% in the intervention group had previously undergone cervical cancer screening. 42% of women in the control group and 35.8% in the intervention group did not have health insurance​	Not reported	Home-based HPV self-sampling kit mailed to participants	Liquid-based cytology performed by a clinician (control group)	23.7% (75 women) were HPV-positive in the self-sampling group .	17.9% (55 women) had an ASC-US or worse result, with 25% of them testing HPV-positive .	--	--	not reported	not mentioned	not mentioned	not mentioned	not mentioned	The study concludes that while self-sampling for HPV testing did not significantly increase screening participation compared to clinician-collected samples in this Swiss population, it did result in a higher detection rate of CIN2+ lesions. However, the dropout rate after a positive HPV test was significantly higher in the self-sampling group, suggesting that additional steps are needed to improv…		Did they review address - yes clearly focused question Did the authors look for the right type of papers? - can't tell Do you think all the important,relevantstudies wereincluded - yes	Detection Bias: Low
57	Amrei Krings	Performance of OncoE6 Cervical Test with Collection Methods Enabling Self-Sampling	2018	Germany	Prospective Validation Study	20 women	not specified	Women with histologically confirmed HPV 16/18 positive cervical cancer.	not mentioned	not specified in text	not reported	Delphi Screener lavage (self-collected cervico-vaginal lavage sample).	Cytobrush collected in PreservCyt media (clinician-collected cervical sample).	95% sensitivity for detecting HPV 16/18 positive cervical cancer using self-collected lavage samples.	95% sensitivity for detecting HPV 16/18 positive cervical cancer using cytobrush samples.	Sensitivity for detecting HPV 16/18 positive cervical cancer was 95% for both self-collected lavage samples and clinician-collected cytobrush samples. The swab method yielded 100% sensitivity.	--	specificity was not calculated as all participants were HPV 16/18 positive.	not mentioned	not mentioned	not mentioned	not mentioned	The study demonstrates that the OncoE6 cervical test, when used with self-collected lavage samples from the Delphi Screener, is a feasible and effective method for detecting HPV 16 and 18 in women with cervical cancer. The sensitivity of the test was 95% for both self-collected and clinician-collected samples, showing strong concordance between the two methods. The swab method yielded 100% sensit…		right type of papers? - can't tell Do you think all the important,relevantstudies wereincluded - yes	Attrition Bias: Low
58	Jerry W. McLarty	Cervical Human Papillomavirus Testing With Two Home Self-Collection Methods Compared With a Standard Clinically Collected Sampling Method	2019	United States (Louisiana)	Randomized clinical trial (paired noninferiority study design)	174 patients	Median age was 46 years in New Orleans and 51 years in Shreveport.	Age 21 years or older No history of hysterectomy English speaking Biological female Due for a Pap test or HPV test Residing in Louisiana Ability to use a tampon	History of hysterectomy History of gynecologic cancer History of toxic shock syndrome Being pregnant	Predominantly African-American population (83.1% in New Orleans, 71.6% in Shreveport)	Not reported	Tampon-based method Swab-based method using Eve Medical HerSwab	The study used HPV testing along with a routine Pap test, but the type of Pap smear was not explicitly mentioned.	Tampon method: 15.3% positive (with 27% insufficient samples) Swab method: 15.3% positive	13.5% positive for high-risk HPV subtypes.	Not explicitly provided; equivalence and reliability were tested using McNemar χ2 test and Cohen κ.	The swab self-collection method was found to be statistically noninferior to the clinical method, with a high agreement rate (Cohen κ = 0.772).	Swab method: Sensitivity 86%, Specificity 94% Tampon method: Sensitivity 77.2%, Specificity 100% (not recommended due to high failure rate)	Not explicitly reported.	The swab method was found to be easier to use and preferred by participants over the tampon method. A larger number of women reported difficulty with the tampon method.	Not assessed in the study.	Not explicitly mentioned, but the swab method was noted for its ease of use and reliability, suggesting potential efficiency in clinical practice.	In summary, this study supports the inclusion of self-swab screening for HPV as an effective alternative to Pap smear screening. It can potentially increase screening rates by offering a convenient, reliable, and acceptable method for women, particularly those who face barriers to traditional screening methods. However, the choice of self-sampling method is critical, as some methods may not be as…		Validity: Clear focus: The study had a clear research objective to compare the effectiveness of two self-collection methods with clinician-collected samples for HPV testing. Acceptable recruitment: Patients were recruited from two cancer screening clinics, and the inclusion/exclusion criteria were clearly defined. Accurate measurement: The study used standardized and FDA-approved methods (Roche C…	Selection Bias: Low Patients were randomly assigned to one of two self-collection methods, ensuring balanced groups. Performance Bias: Low The study was conducted under routine clinical conditions with standardized instructions provided to all participants. Detection Bias: Low All samples were processed using the same FDA-approved method, and outcomes were measured consistently across groups. Att…
59	Dorcas Obiri-Yeboah	Self-collected vaginal sampling for the detection of genital human papillomavirus (HPV) using careHPV among Ghanaian women	2017	Ghana	cross-sectional study	194 women were included, with 191 paired self-collected (SC) and clinician-collected (CC) samples analyzed.	Mean age was 44.1 years, with a standard deviation of ±11.3 years.	Women attending the Cape Coast Teaching Hospital’s HIV and outpatient clinics, aged ≥18 years.	Women who were currently menstruating or had prior treatment for cervical cancer.	not specified	Not reported.	careHPV brush (self-collected vaginal sample).	careHPV brush (clinician-collected cervical sample).	Sensitivity of 92.6% for detecting HPV-positive samples.	Sensitivity of 95.9% for detecting HPV-positive samples.	Overall concordance between SC and CC samples was 94.2%, with a kappa value of 0.88 (p < 0.0001), indicating excellent agreement. Sensitivity of SC samples was 92.6% compared to CC samples.	The kappa value of 0.88 (p < 0.0001) indicates statistically significant concordance between SC and CC samples.	Sensitivity: The sensitivity of self-collected (SC) samples compared to clinician-collected (CC) samples was 92.6% (95% CI: 85.3–97.0). Sensitivity was higher among HIV-positive women, reaching 95.7% (95% CI: 88.0–99.1) . Specificity: The specificity of SC samples compared to CC samples was 95.9% (95% CI: 89.8–98.9). Specificity was highest among HIV-negative women, reaching 98.6% (95% CI: 92.4–1…	not directly reported.	Over 76% of women found self-sampling easy, and 57.7% preferred it over clinician sampling.	not mentioned	not mentioned	The study demonstrates that self-collected vaginal sampling using the careHPV test is a highly sensitive and specific method for detecting high-risk HPV genotypes among Ghanaian women. With a sensitivity of 92.6% and specificity of 95.9%, self-sampling showed excellent agreement with clinician-collected samples, achieving even higher sensitivity among HIV-positive women (95.7%). The findings indi…	.	CASP Assessment Validity: Clear focus: Yes Acceptable recruitment: Yes Accurate measurement: Yes Some confounders missing: Yes (potential biases related to patient selection and sample handling not fully detailed) Results: Precise and believable: Yes Consistent with other evidence: Yes Relevance: Applicable to local population: Yes Implications for practice: Yes	Low risk of bias for all key domains
60	Jean-Luc Haguenoer	Vaginal self-sampling is a cost-effective way to increase participation in a cervical cancer screening programme: a randomised trial	2014	France	RCT	5,998 women	30 to 65 years	Women aged 30-65 years who had not undergone cervical cancer screening within the last 3 years.	Women who had undergone a Pap smear in the past 3 years, had a hysterectomy, had never had sexual intercourse, or had a cervical abnormality that was under investigation or treatment.	not specified	Not reported.	Vaginal self-sampling with a dry nylon flocked swab.	Clinician-collected Pap smear.	not mentioned	not mentioned	not mentioned	The increase in screening participation through self-sampling was statistically significant (P < 0.001).	not mentioned	not mentioned	not mentioned	Self-sampling was found to be cost-effective, with an Incremental Cost-Effectiveness Ratio (ICER) of €63.20 per additional screened woman, relative to no intervention.	not mentioned	The study demonstrates that vaginal self-sampling significantly increases participation in cervical cancer screening programs compared to standard recall methods. The randomized controlled trial found that self-sampling led to a participation rate of 22.5%, which was substantially higher than the 9.9% in the no-intervention group and 11.7% in the recall group. The intervention was also found to b…	.	Validity: Clear focus: Yes Acceptable recruitment: Yes Accurate measurement: Yes Some confounders missing: Yes (demographic details like ethnicity and socio-economic status not fully detailed) Results: Precise and believable: Yes Consistent with other evidence: Yes Relevance: Applicable to local population: Yes Implications for practice: Yes	Low or unclear risk of bias for all key domains
61	Lovisa Bergengren	Comparison between professional sampling and self-sampling for HPV-based cervical cancer screening among postmenopausal women	2018	Sweden	Cross-sectional study	110 women	55 to 60 years	Postmenopausal women aged 55-60 years attending cervical cancer screening	not mentioned	Focused on postmenopausal women aged 55-60 years, no further specific socio-economic or ethnicity data provided	Not reported	Vaginal self-sampling using a brush	Clinician-collected cervical sample	Not explicitly provided, focused more on concordance rates	Not explicitly provided, focused more on concordance rates	The study found 83% concordance between self-sampling and professional sampling, with self-sampling showing a trend toward detecting more HPV genotypes, though not statistically significant.	No significant differences were noted in genotype detection, though self-sampling detected more HPV genotypes in some cases.	not mentioned	not mentioned	Self-sampling was noted as a potential solution to increase screening participation	not mentioned	not mentioned	The study demonstrates that self-sampling for HPV-based cervical cancer screening among postmenopausal women shows a high level of concordance with clinician-collected samples, with an 83% agreement rate. While self-sampling tended to detect more HPV genotypes than professional sampling, the difference was not statistically significant. The findings suggest that self-sampling could be a feasible …	.	Validity: Clear focus: Yes Acceptable recruitment: Yes Accurate measurement: Yes Some confounders missing: Yes (potential biases related to patient selection and sample handling not fully detailed) Results: Precise and believable: Yes Consistent with other evidence: Yes Relevance: Applicable to local population: Yes Implications for practice: Yes	Low or unclear risk of bias for all key domains
62	Morgan Mandigo	Pairing community health workers with HPV self-sampling for cervical cancer prevention in rural Haiti	2015	Haiti	Cross-sectional study	493 women enrolled, 426 samples analyzed	30 to 50 years	Premenopausal women aged 30-50 years who had not undergone a cervical smear in the previous 3 years	not mentoned	Focused on rural Haitian women in a low-resource setting	Not reported	Self-sampling device for high-risk HPV testing provided by community health workers	Not applicable; study focused on self-sampling for HPV	12.7% of analyzed samples were positive for high-risk HPV	not applicable	Not applicable, as the study was descriptive in nature	not applicable	not mentioned	not mentioned	96.5% of women were comfortable with self-sampling, and 99.8% stated they would recommend it to others	not mentioned	not mentioned	The study demonstrates that pairing community health workers with HPV self-sampling for cervical cancer prevention in rural Haiti is a feasible and highly acceptable approach. Of the women who participated, 12.7% tested positive for high-risk HPV, indicating the effectiveness of the self-sampling method in detecting potential cervical cancer risks. The vast majority of women (96.5%) were comforta…	.	Validity: Clear focus: Yes Acceptable recruitment: Yes Accurate measurement: Yes Some confounders missing: Yes (demographic details like ethnicity and socio-economic status not fully detailed) Results: Precise and believable: Yes Consistent with other evidence: Yes Relevance: Applicable to local population: Yes Implications for practice: Yes
63	Chiyancheri	Diagnostic study of human papillomavirus DNA detection in cervical and vaginal samples using the filter paper card	2023	india / oman	Cross-sectional study	42 women	39-55 years	not explicitly mentioned	not mentioned	not specified	not reported	filter paper	filter paper	not mentioned	not mentioned	not mentioned	P < 0.001	the physician-collected cervical samples on filter paper had a sensitivity of 77.8%, a specificity of 100%. The patient's self-sampling on filter paper had a sensitivity of 66.7%, a specificity of 100%,	The physician collected cervical samples had a a PPV of 100%, and an NPV of 68.4%. a PPV of 100%, and an NPV of 59.1%.	The patients' reactions to self-sampling are given in Table 2. For most of the patients, self-collection was acceptable (100%), not painful (95%), and not embarrassing (95%), but when asked who they would prefer to perform the test, the majority opted for the doctor (95%).	n/a	not mentioned	Filter paper, with dried self-collected vaginal samples, can be used to detect high-risk HPV with acceptable accuracy.	.	Validity: Clear focus: Yes Acceptable recruitment: Yes Accurate measurement: Yes Some confounders missing: Yes (potential biases related to patient selection and sample handling not fully detailed) Results: Precise and believable: Yes Consistent with other evidence: Yes Relevance: Applicable to local population: Yes Implications for practice: Yes	Low risk of bias for all key domains
64	Rakiya Saidu, MD, MPH	Performance of Xpert HPV on Self-collected Vaginal Samples for Cervical Cancer Screening Among Women in South Africa	2021	South Africa	Prospective observational study	1,121 women (715 from the screening clinic and 406 from the referral colposcopy clinic)	Median age was 42 years	Women from the general population seeking primary screening Women referred for colposcopy due to abnormal screening test results	Not explicitly mentioned	HIV-positive and HIV-negative women Median age: 42 years Education: Approximately 25% had completed grade 12 Contraceptive use: 44% used contraception Tobacco use: 84% never smoked	Not specified	Standard flock tip swab (Puritan, Guilford, ME) inserted into the vagina	Clinician-collected cervical sample using extended tip plastic spatula and endocervical cytobrush	Higher in self-collected samples than in clinician-collected samples among HIV-positive women (61.5% vs. 48.2%) and HIV-negative women (25.1% vs. 16.3%).	Specific figures not provided, but clinician-collected samples showed lower detection rates compared to self-samples.	Good agreement between self- and clinician-collected samples with Cohen κ = 0.72 (95% CI: 0.669–0.771).	Agreement between sampling methods is statistically significant, with high kappa values indicating good reliability.	Sensitivity for CIN2+: HIV-positive: 95.8% in self-collected samples vs. 93.5% in clinician-collected samples HIV-negative: 87.7% in self-collected samples vs. 88.5% in clinician-collected samples Specificity for CIN2+: HIV-positive: 44.0% in self-collected samples vs. 59.7% in clinician-collected samples HIV-negative: 77.5% in self-collected samples vs. 86.9% in clinician-collected samples	not mentioned	Not mentioned in the text provided.	Not discussed in the text provided.	Xpert HPV test results are available in about an hour, making it suitable for point-of-care testing.	The findings from this study suggest that self-swab screening for HPV is an effective and reliable alternative to pap smear screening. While self-swabs offer comparable sensitivity and ease of access, particularly in low-resource settings, they do have slightly lower specificity, which may lead to more false positives. However, this trade-off may be acceptable in contexts where increasing access …	.	Validity: Clear focus: Yes Acceptable recruitment: Yes Accurate measurement: Yes Some confounders missing: Yes (demographic details like ethnicity and socio-economic status not fully detailed) Results: Precise and believable: Yes Consistent with other evidence: Yes Relevance: Applicable to local population: Yes Implications for practice: Yes	Low or unclear risk of bias for all key domains
65	Rebecca Landy	Non-speculum clinician-taken samples for human papillomavirus testing	2023	London, UK	Cross-sectional study	83 women	35-70	samples were collected from women aged ≥50 years attending for a colposcopy (following a speculum HPV-positive screening result) or women aged ≥35 years (with confirmed cervical intraepithelial neoplasia (CIN) 2+), and women aged 50 64 years attending routine screening.	those who dont meet the inclusion criteria	older women	not reported	FLOQSwab	not specified	might be mentioned, but not clear	might be mentioned, but not clear	not mentioned	P < 0.001	The sensitivity of non-speculum samples for detecting CIN2+ was good (83.3%). Among 204 women with negative cytology, the specificity to HPV was 96.4%	not mentioned	Seventy-one percent (n = 120/170) of women preferred a non-speculum sample for their next screen.	not discussed	not mentioned	HPV testing on non-speculum clinician-taken samples is a viable approach	Most women found both the taking of non-speculum and conventional samples to be an ‘excellent/good’ overall experience (90.1% and 73.3% respectively), but discomfort was higher for conventional samples (76.9% versus 36.5% [mild/ quite a lot/severe discomfort]) (Table 5). Most women (n = 133/171; 77.8%) preferred the non-speculum sample over the conventional sample, and two-thirds (n = 120/170; 70…	.
66	Agajie Likie Bogale	Comparison of self‑collected versus clinician collected cervicovaginal specimens for detection of high risk human papillomavirus among HIV infected women in Ethiopia	2022	Ethiopia	Cross-sectional study	994 women	>24 years	/	/	/	not reported	Abbott Cervi-Collect Specimen Collection Kit	not specified	The prevalence of high-risk HPV was 29.4% among self-sampled specimen	23.9% among clinician collected specimens.	not mentioned	P < 0.001	The sensitivity and specificity of self-sampled HPV test was 84.0% and 88.4%, respectively.	not mentioned	not mentioned	not discussed	not mentioned	The magnitude of oncogenic HPV was higher in self-collected samples than the clinician collected specimen with good agreement between the two sampling methods. Thus, we recommend the Ministry of Health in Ethiopia to expand utilization of the self-sampled technique and enhance the coverage of screening in the country.	.	Validity: Clear focus: Yes Acceptable recruitment: Yes Accurate measurement: Yes Some confounders missing: Yes (demographic details like ethnicity and socio-economic status not fully detailed) Results: Precise and believable: Yes Consistent with other evidence: Yes Relevance: Applicable to local population: Yes Implications for practice: Yes

## Sheet: (sensitivity)
Study ID	Sensitivity and specificity of self-sampling versus Pap smear	Inclusion Criteria	Self sampling Sensitivity (final %)	pap smear sensitivty (final %)	Note for included values from each study (normal or abnormal patients)	Note for included studies (with no values)
1	Some of the included studies illustrated that self sampling was similar in sensitivity and slighlt more sensitive. Other studies illustrated that self sampling was less sensitive and similar in specificity	Studies published before august 2021, "Eligible studies had to contain comparative data addressing one of our three clinical questions."	--	--	--	--
2	Figure 1 shows that in screening studies, the pooled sensitivity of hrHPV assays for CIN2+ was substantially lower in self samples (77%) than in clinician samples (93%). The pooled specificity to exclude CIN2+ was 84% in self samples and 86% in clinician samples.	Studies that compared Self sample vs Clinician sample. A Minimum of 400 women in the study. There is alot more info in the "Criteria for study selection" section	0.77	0.93	both CIN2+								Number of studies with % sensitivity for HPV from normal patients: 20 studies					Number of studies with % sensitivity for HPV from abnormal patients: 20 studies
3	The study only compares different types of self sampling so it is not mentioned		--	--	--								Self sampling HPV Sensitivity	Pap smear HPV Sensitivuty				Self sampling HPV sensitivity	Pap smear HPV sensitivity
4	No significant difference was observed in the relative sensitivity and specificity between vaginal samples tested with the two platforms. "First vaginal self sample sensitivity: 89.2%. Second vaginal self sample sensitivity: 90.2%. Moreover, clinical sensitivity for CIN2 on self-collected samples using BD Viper LT or BD COR compared to paired LBC sample was 1.01, 1.01, and 1.00, respectively."	not explicitly mentioend, but it should be along the lines of women with a recent history of abnormal cervical cytology	0.897	N/A	CIN2+ (vaginal samples)								0.77	0.93				0.955	0.955
5	Higher sensitivity in self sampling	Sources in English and French were included due to the research team’s linguistic capabilities. 1993 was chosen as the cut-of year as that was when the frst study on HPV self-sampling was published				Higher sensitivity in self sampling							0.625	0.828				0.897	N/A
6	Cervical and vaginal specimens were equally sensitive for CIN2+ detection (95.5%), vaginal samples were slightly inferior in terms of specificity	not specified	0.955	0.955	SS: 95.5% for CIN2+ (vaginal samples) PS: 95.5% for CIN2+ (cervical samples)								0.953	0.963				0.941	0.9375
7	Self sampling lower sensitivity and higher specificty compared to clinician samples	not specified				Self sampling lower sensitivity							0.667	N/A				0.855	0.8175
8	Self sampling Sensitivity: 94.1%, Specificity: 31.0%. Pap smear: Sensitivity: 93.75%, Specifity 31.1%	Participants were referred for colposcopy on account of the presence of the following cytological changes on the basis of the 2014 Bethesda system	0.941	0.9375									0.88	0.94				0.861	0.857
9	Self sampling Sensitivity: 62.5%, Specificity: 59.3%. Pap smear: Sensitivity: 82.8%, Specifity 82.1%. When combined, the sensitivity and specificity for HPV and Pap smear were 90.6%, 70.6%	inclusion criteria were being aged 25–60 years, and no history of premalignant or cervical cancer.	0.625	0.828	62.5% for CIN2+ (Normal patients) 82.8% for CIN2+ (Normal patients)								0.807	N/A				0.8566	N/A
10	Provided in Table 2 - Too many results to include here	Women aged 30-65 years in urban and rural China	?	?	?								0.96	1				0.594	1
11	Substantial agreement was demonstrated between self-samples and clinician-collected samples, with Cohen's kappa values indicating high concordance.	Women referred to colposcopy for a recent abnormal Pap smear, reported as LSIL, HSIL, ASCUS, AGC, ASCH, or ACG				Same for both							0.99	0.99				0.667	1
12	Not relevant	Women referred to colposcopy because of previous cervical abnormalities (Atypical Squamous Cell where a High-grade squamous lesion cannot be excluded [ASC-H] or worse squamous cervical abnormalities, Atypical Glandular Cells [AGC], repeated low-grade abnormalities or HPV+ Atypical Squamous cells of Undetermined Significance [ASC-US]), and those age 25–64 years	--	--	--								0.82	0.91				0.928	0.928
13	Vaginal self-samples: 85.5% sensitivity, 48.1% specificity, Clinician-taken cervical HPV samples: 100% sensitivity, 49.0% specificity, Routine cytology: 81.7% sensitivity, 93.3% specificity	Women attending the women’s clinic in Lund for colposcopy due to abnormal screening results or monitoring of dysplasia following previous excisional treatment	0.855	81.75	85.5% for CIN2+ (Abnormal patients) : 81.7% for CIN2+ (Abnormal patients)								0.79	0.94				0.846	1
14	Not detailed in the text	Women who had not received a Pap test in the previous 4 years, Lived in North Carolina, Not pregnant, Had not undergone a hysterectomy, Aged between 30–65 years, and Met one of the following income criteria - Had children that qualified for the federal school lunch program, Had Medicaid or Medicare Part B insurance, Were uninsured and living at or below 200% of the federal poverty level	--	-									0.8805	N/A				0.9636	N/A
15	At 6 months: Self-HPV Sensitivity for HSIL+: 88.9%, Specificity: 66.9%, At 6 months: Dr-HPV Sensitivity for HSIL+: 100%, Specificity: 74.3%, At 12 months: Self-HPV Sensitivity for HSIL+: 83.3%, Specificity: 65.6%, At 12 months: Dr-HPV Sensitivity for HSIL+: 71.4%, Specificity: 79.0%	Women aged 30–49 years who were HPV-positive in a primary cervical cancer screening campaign, and Attendees of the Dschang District Hospital, Cameroon	0.861	0.857	86.1% for HSIL+ 85.7% for HSIL+								1	N/A				0.815	0.93
16	Self-sampling with HPV testing is as sensitive but slightly less specific than clinician-taken samples	Asymptomatic women with a cervix aged 25-65 years, HPV vaccination status not considered for different screening procedure				both same							1	1				1	1
17	Not specifically detailed in the text	Women aged 30–69 years, Never-screened or under-screened women in Victoria, Australia, Residing in Victoria, Australia, Not pregnant at the time of the study, Had not had a hysterectomy	-	-									0.75	0.929				0.5	0.815
18	Test sensitivity/specificity for CIN2+: Pap/HPV co-testing: 96.3%/80.6%, Test sensitivity/specificity for CIN2+: hrHPV self-collection: 95.3%/72.2%	African-American women, Aged 25–65 years, Residing in the Mississippi Delta, No prior history of cervical cancer or hysterectomy, Not currently pregnant, Had not given birth in the prior 8 weeks, Had not been screened in the last four years	0.953	0.963	95.3% for CIN2+ (Normal patients) 96.3% for CIN2+ (Normal patients)								0.883	0.924				0.878	0.9363
19	Specificity for HSIL: 86.6% (86.2–86.6%) Sensitivity for HSIL: 100% (52.1–100%) Specificity for ASC-US+: 87.8% (86.9–88.9%) Sensitivity for ASC-US+: 45.0% (30.3–60.3%)	Non-pregnant women aged between 20 and 89 years, no previous cervical therapy or hysterectomy	1	0.45	SS: 100% for HSIL (Normal patients) PS: 45.0% for ASC-US+ (Normal patients)	Mention in results bs							0.86	0.772				0.918	0.902
20	Sensitivity for CIN3+: WD: 91.2% DF: 88.2% QT: 81.8% HS: 77.4% Urine: 89.7% Specificity for <CIN2: WD: 34.2% DF: 33.8% QT: 34.3% HS: 39.5% Urine: 27.4%	Women referred to the Royal London Hospital colposcopy clinic with a positive screening result. Women under observation for prior abnormalities, provided their most recent abnormal smear test was within the last three years	0.8566	N/A	85.66% for abnormal patients for CIN3+								0.667	0.778				0.975	0.975
21	Sensitivity for detecting ≧CIN2: 59.4% (sHPV) vs. 100% (pHPV) Sensitivity for detecting CIN3: 66.7% (sHPV) vs. 100% (pHPV) Specificity for detecting ≧CIN2: 65.4% (sHPV) vs. 51% (pHPV) Specificity for detecting CIN3: 61.4% (sHPV) vs. 41.7 (pHPV)	Women aged 20-69 years Abnormal cervical cytology results	0.594	1	Self-Sampling Sensitivity (%): 59.4% for detecting CIN2+ (Abnormal patients) Self-Sampling Sensitivity (%): 66.7% for detecting CIN3 (Abnormal patients) Pap Smear Sensitivity (%): 100% for detecting CIN2+ (Abnormal patients) Pap Smear Sensitivity (%): 100% for detecting CIN3 (Abnormal patients)								0.9465	0.881				0.867	0.9663
			0.667	1									0.833	N/A				0.846	N/A
22	The vaginal self-sampling and the clinician-taken HPV tests had the same sensitivity of 92.8% (95% confidence interval=86.3- 96.8%) and specificity for detection of high-grade squamous intraepithelial lesion (HSIL) and adenocarcinoma in situ (AIS). Detection in urine samples had a sensitivity of 76.3% (95%	Women aged 19 to 71 years with an abnormal cervical smear in the screening program or with symptoms were invited to the Outpatient Colposcopy Clinic at regional hospitals in Kristianstad and Helsingborg	0.928	0.928	92.8% for detecting HSIL and AIS (Abnormal patients) 92.8% for detecting HSIL and AIS (Abnormal patients)								0.84	N/A				0.774	N/A
23	Self-Sampling Sensitivity: 84.6% (95% CI 59.1–96.7) Self-Sampling Specificity: 68% (95% CI 54.3–79.6) Pap Smear Sensitivity: 100% (95% CI 82.7–100) Pap Smear Specificity: 72% (95% CI 58.6–83.0)	Patients identified with a missed abnormality following the re-evaluation of be- nign cervical cytology were included	0.846	1	84.6% (Abnormal patients) 100% (Abnormal patients)
24	Sensitivity of self-smapling: 66.7% Specificity of self-sampling: 66.1%	Aged 18 years or older Not currently pregnant No known abnormal Papanicolaou test results No symptoms of cervical cancer, genital cancer, cervical surgery, or immune treatment of the cervix in the last 6 months	0.667	N/A	Self-Sampling Sensitivity (%): 66.7% for CIN2+ (Normal patients)
25	Relative sensitivity was 0.88 (95% CI 0.72–1.08) self-sampling and 0.94 (0.90–0.97) for clinician-collected samples Self-sampling showed a 6% lower sensitivity but 2% higher specificity compared to clinician-based hrHPV testing​	Women invited for high-risk HPV (hrHPV) testing in the Dutch cervical screening program​	0.88	0.94	88% relative sensitivity for high-risk HPV (Normal patients) 94% relative sensitivity for high-risk HPV (Normal patients)
26	Mía by Xytotest®: Sensitivity of 95.7%, Specificity of 91.7% Viba-Brush®: Sensitivity of 95.7%, Specificity of 88.9% Iune: Sensitivity of 90.9%, Specificity of 84.6% Viscose Swab: Sensitivity of 81.8%, Specificity of 87.2% Cytological Results for Self-Sampling Viba-Brush®: Sensitivity (95% CI): 65.0% (40.8%-84.6%) Specificity (95% CI): 84.6% (65.1%-95.6%) Kappa Coefficient (95% CI): 0.51 (0.25–0.…	Women aged between 35 and 65 years	0.807	N/A
27	Self-sampling with HPV16/18 genotyping showed a sensitivity of 96.36%​	Non-pregnant women Aged 25-60 years Residing in rural areas of Greece Tested high-risk HPV positive on self-collected cervicovaginal samples	0.9636	N/A	Self-Sampling Sensitivity (%): 96.36% for HPV16/18 genotyping (Abnormal patients)								Number of studies with % sensitivity for HPV from normal patients: 14 studies (area chart)					Number of studies with % sensitivity for HPV from abnormal patients: 15 studies (area chart)
28	similar sensitivity (mentioned in intro when referring to a conclusion from a meta analysis)	n/a				same for both							Self sampling HPV Sensitivity	Pap smear HPV Sensitivuty				Self sampling HPV sensitivity	Pap smear HPV sensitivity
29	not mentioned	used the trial database and EHR to identify, on a weekly basis, eligible subjects from the trial who (1) were randomized to the intervention arm, (2) returned the kit, and (3) tested positive for any hrHPV type	--	--	--								77.00%	0.93				0.955	0.955
30	look at table 3. Performance of hr-HPV mRNA testing of self-collected stored wet, self-collected stored dry, and physician-collected specimens, and visual inspection with acetic acid for the detection of ≥HSIL The overall sensitivity estimates of hr-HPV mRNA for ≥HSIL of sc-WET [85%] and sc-DRY [78%] were comparable (Difference: −0.07). Physician-collected samples for hr-HPV mRNA testing showed a…	The criterion for inclusion into the Mombasa Cohort included: 1. Women aged 18 years and above; 2. Residing in the Mombasa area; 3. Self-identifying as exchanging sex for payment in cash or in-kind at the time of enrollment and 4. Able to provide informed consent.	0.815	0.93	Self-Sampling Sensitivity (%):81.5% for ≥HSIL (Abnormal patients) Pap Smear Sensitivity (%): 93% for ≥HSIL (physician-collected) (Abnormal patients)								62.50%	0.828				0.941	0.9375
31	Reflex cytology on self‐samples for detecting abnormal cytology showed a sensitivity of 26.4% and specificity of 90.5%	Women aged 30-60, HPV-positive											95.30%	0.963				0.855	0.8175
32	The CIN2+ sensitivity and specificity of HPV testing did not differ between self-sampling and clinicianbased sampling (relative sensitivity 0·96 [0·90–1·03]; relative specificity 1·00 [0·99–1·01]). \ For the CIN3+ endpoint, relative sensitivity was 0·99 (0·91–1·08) and relative specificity was 1·00 (0·99–1·01).	Women were enrolled in the IMPROVE study if they returned a signed informed consent form between April 15, 2015, and Dec 13, 2016.	0.96	1	Self-Sampling Sensitivity (%): 96% relative sensitivity for CIN2+ (Normal patients) Self-Sampling Sensitivity (%): 99% relative sensitivity for CIN3+ (Normal patients) Pap Smear Sensitivity (%): 100% relative sensitivity for CIN2+ (Normal patients) Pap Smear Sensitivity (%): 99% relative sensitivity for CIN3+ (Normal patients)								88.00%	0.94				0.861	0.857
			0.99	0.99									96.00%	1				0.594	1
33	DNA methylation analysis of JAM3 showed the highest combined specificity (88%) and sensitivity (82%) for detection of CIN3+, whereas cytology showed a specificity of 48% and a sensitivity of 91%.	participated in the PROHTECT-3B, and aged 33-63	0.82	0.91	both for CIN3+								99.00%	0.99				0.667	1
34	Cervista self-test sensitivity: 76%, clinician test: 92%; Aptima self-test sensitivity: 82%, clinician test: 96%).	/	0.79	0.94									82.00%	0.91				0.928	0.928
35	Both methods showed 100% sensitivity to CIN2+. Specificity: 57.0% for physician-sampling and 58.1% for self-sampling	Female patients, Previously tested negative for intraepithelial lesions or malignancy/HPV-positive, Patients with atypical squamous cells of undetermined significance or worse (ASCUS+) cytology	1	1	100% for CIN2+ (Abnormal patients) 100% for CIN2+ (Abnormal patients)								79.00%	0.94				0.846	1
36	Sensitivity and specificity not explicitly provided but moderate correlation was observed.	Women presenting for cervical cancer screening	--	--	--	--							100.00%	1				0.815	0.93
37	Sensitivity (Self-sampling): 50.0% (for HPV) Specificity (Self-sampling): 71.7% Sensitivity (Pap smear): 81.5% (for HPV) Specificity (Pap smear): 71.3%	Women aged 18-64 years with abnormal cervical cytology results (ASCUS or worse)	0.5	0.815	50.0% for HPV (Abnormal patients) 81.5% for HPV (Abnormal patients)								75.00%	0.929				1	1
38	Not explicitly stated, but concordance was 96.8%, with true positive and true negative rates as mentioned above.	Women aged 30–60 years, participating in the Dutch cervical cancer screening program.	--	--	--								88.30%	0.924				0.5	0.815
39	vsc-DRY: Sensitivity 88.7%, Specificity 92.5% vsc-LIQ: Sensitivity 87.4%, Specificity 90.9%​	Women due for a routine screening Pap smear, aged 20 to 65, self-reported not a virgin, not pregnant, not vaccinated against HPV, not menstruating, had no Pap smear for at least 2 years, and had no prior hysterectomy​	0.8805	N/A	88.05% for SS								86.00%	0.772				0.878	0.9363
40	Sensitivity for CIN3+ Anyplex™ II HPV28: Physician-collected: 95.6% Evalyn®Brush: 94.5% FLOQSwabs™: 87.4% Cobas® 4800: Physician-collected: 94.0% Evalyn®Brush: 90.7% FLOQSwabs™: 86.3% Xpert® HPV: Physician-collected: 94.5% Evalyn®Brush: 91.2% FLOQSwabs™: 87.9% Sensitivity for Invasive Carcinoma Anyplex™ II HPV28: Physician-collected: 93.3% Evalyn®Brush: 91.1% FLOQSwabs™: 86.7% Cobas® 4800: Physic…	Women referred for treatment of premalignant cervical lesions or with a diagnosis or suspicion of cervical carcinoma​	0.878	0.9363	Average Self-Sampling Sensitivity (SS): 87.8% Average Physician-Collected Sensitivity: 93.63%								66.70%	0.778				0.918	0.902
41	Not specified but they mentioend this "we found that self-collected HPV DNA testing had a high sensitivity for high grade lesion detection (100%)"	Women attending routine cervical cancer screening at King Chulalongkorn Memorial Hospital between January 1, 2015, and May 31, 2015​	1	N/A	Self-Sampling Sensitivity (%): 100% for high-grade lesion detection (Normal patients)								94.65%	0.881				0.975	0.975
42	not specified	Not specified	--	--	--													0.867	0.9663
43	Sensitivity of self-sampling: 91.8% (95% CI: 85.4%-96.0%) Sensitivity of Pap smear: 90.2% (95% CI: 83.6%-94.9%)	Women with abnormal cervical cytology and/or positive high-risk HPV who attended colposcopy clinics in Bangkok, Thailand.	0.918	0.902	91.8% (Abnormal patients) 90.2% (Abnormal patients)
44	Sensitivity for CIN2+ detection: For SPF10: 100% (CTS and SS) For GP5+/6+: 95% (all) Specificity for CIN2+ For SPF10: 33% (CTS) and 35% (SS) For GP5+/6+: 39% (CTS) and 43% (SS)	Women referred for colposcopy to the Hospital Clínic, Barcelona, Spain, because of abnormal cervical cytology	0.975	0.975	Average Self-Sampling Sensitivity (SS): 97.5% for CIN2+ Average Clinician-Collected Sensitivity (CTS): 97.5% for CIN2+
45	not mentioned	Women aged 30-49 years Not pregnant Able to provide informed consent No history of cryotherapy, loop electrosurgical excision procedure, or hysterectomy	--	--	--
46	not mentioned	Women aged 25-69 years Never participated in a cervical cancer screening program or not had a screening test in the previous 3 years	--	--	--
47	Cervical Samples: PreservCyt: Sensitivity: 96.6% (95% CI: 82.8–99.4) Specificity: 66.2% (95% CI: 62.1–70.1) Cervical SCT: Sensitivity: 100% (95% CI: 88.7–100) Specificity: 59.8% (95% CI: 55.6–63.8) SurePath: Sensitivity: 93.3% (95% CI: 78.7–98.2) Specificity: 70.9% (95% CI: 66.9–74.5) Vaginal Samples: SCT (self-collected): Sensitivity: 86.7% (95% CI: 70.3–94.7) Specificity: 60.1% (95% CI: 55.9–64…	Women referred to a colposcopy clinic due to previous abnormal cytology or positive HPV results	0.867	0.9663	86.7% Average Pap Smear Sensitivity (PS): 96.63%
48	Sensitivity: 84.6% for self-sampling Specificity: 62.9% for self-sampling	Women living with HIV (WLHIV) aged 30 years or older undergoing a Pap test with HPV DNA testing as part of routine care	0.846	N/A	Self-Sampling Sensitivity (%): 84.6% (Abnormal patients)
49	Sensitivity for CIN2+ detection: 100% for both self-home and clinician samples Specificity for CIN2+: 91.1% for self-home samples, 92.2% for clinician samples	Women aged 30-64 years, overdue for cervical cancer screening (no Pap test in the past 4 years), low-income (household income below 250% of the poverty level), uninsured, underinsured, or with Medicaid insurance	1	1	100% for CIN2+ (Normal patients) 100% for CIN2+ (Normal patients)
50	Sensitivity: 77.4% for self-sampling Specificity: 77.7% for self-sampling	HIV-infected women, 25 years or older, without a cervical cytology test result documented in their chart within the past three years.	0.774	N/A	Self-Sampling Sensitivity (%): 77.4% (Abnormal patients)
51	The sensitivity of FAM19A4 methylation in self-samples was slightly lower, and specificity was higher compared to physician-collected cervical scrapes​	Women visiting gynecological outpatient clinics, hrHPV-positive on cervicovaginal lavage, no history of treatment for cervical dysplasia or cancer, not currently pregnant or lactating​	-	-		PS higher sensitivity
52	Not explicitly provided in the article, but the non-inferiority of self-sampling suggests comparable sensitivity and specificity to midwife-collected samples.	Women aged 30-64 years, residents of Region Skåne, Sweden, and scheduled for routine cervical cancer screening.	-			both same
53	Not directly reported, but the higher detection rate of CIN2+ in the self-sampling group suggests good sensitivity.	Women aged 30-49 years, no previous hysterectomy, no current pregnancy, and no clinical test results relating to cervical cancer registered within 1 year before the date of invitation.	-	-		Suggested good sensitivity for CIN2+ based on higher detection rate (Normal patients)
54	75% in the intervention group and 92.9% in the control group	Women between 30 and 58 years old who did not participate in the cervical cancer screening program for ≥3 years were eligible	0.75	0.929	Self-Sampling Sensitivity (%): 75% in the intervention group (Normal patients) Pap Smear Sensitivity (%): 92.9% in the control group (Normal patients)
55	not explictly provided	Not specified	--	-	-
56	Sensitivity for detecting ≥CIN-II: 87.5% for vaginal swabs vs. 96.9% for cervical swabs Sensitivity for detecting ≥CIN-I: 89.1% for vaginal swabs vs. 87.9% for cervical swabs	Women aged 25-65 years Had engaged in vaginal intercourse at least once during their lifetime	0.883	0.924	Average Self-Sampling Sensitivity (SS): 88.3% Average Pap Smear Sensitivity (PS): 92.4%
57	not reported	Women aged 25-69 years who had not undergone cervical cancer screening in the last 3 years	-	-	-
58	specificity was not calculated as all participants were HPV 16/18 positive.	Women with histologically confirmed HPV 16/18 positive cervical cancer.	-	-
59	Swab method: Sensitivity 86%, Specificity 94% Tampon method: Sensitivity 77.2%, Specificity 100% (not recommended due to high failure rate)	Age 21 years or older No history of hysterectomy English speaking Biological female Due for a Pap test or HPV test Residing in Louisiana Ability to use a tampon	0.86	0.772	Self-Sampling Sensitivity (%): 86% for the swab method (Normal patients) Self-Sampling Sensitivity (%): 77.2% for the tampon method (Normal patients)
60	Sensitivity: The sensitivity of self-collected (SC) samples compared to clinician-collected (CC) samples was 92.6% (95% CI: 85.3–97.0). Sensitivity was higher among HIV-positive women, reaching 95.7% (95% CI: 88.0–99.1) . Specificity: The specificity of SC samples compared to CC samples was 95.9% (95% CI: 89.8–98.9). Specificity was highest among HIV-negative women, reaching 98.6% (95% CI: 92.4–1…	Women attending the Cape Coast Teaching Hospital’s HIV and outpatient clinics, aged ≥18 years.	--	--	Average Self-Sampling Sensitivity for Normal Patients (including HIV-positive): 94.15% Self-Sampling Sensitivity for Abnormal Patients: 92.6%
61	not mentioned	Women aged 30-65 years who had not undergone cervical cancer screening within the last 3 years.	not mentioned	not mentioned
62	not mentioned	Postmenopausal women aged 55-60 years attending cervical cancer screening	not mentioned	not mentioned
63	not mentioned	Premenopausal women aged 30-50 years who had not undergone a cervical smear in the previous 3 years	not mentioned	not mentioned
64	the physician-collected cervical samples on filter paper had a sensitivity of 77.8%, a specificity of 100%. The patient's self-sampling on filter paper had a sensitivity of 66.7%, a specificity of 100%,	not explicitly mentioned	0.667	0.778	Self-Sampling Sensitivity (%): 66.7% (Normal patients) Pap Smear Sensitivity (%): 77.8% (Normal patients)
65	Sensitivity for CIN2+: HIV-positive: 95.8% in self-collected samples vs. 93.5% in clinician-collected samples HIV-negative: 87.7% in self-collected samples vs. 88.5% in clinician-collected samples Specificity for CIN2+: HIV-positive: 44.0% in self-collected samples vs. 59.7% in clinician-collected samples HIV-negative: 77.5% in self-collected samples vs. 86.9% in clinician-collected samples	Women from the general population seeking primary screening Women referred for colposcopy due to abnormal screening test results	0.9465	0.881	Average Sensitivity for HIV-Positive (Normal Patients): 94.65% Average Sensitivity for HIV-Negative (Normal Patients): 88.1%
66	The sensitivity of non-speculum samples for detecting CIN2+ was good (83.3%). Among 204 women with negative cytology, the specificity to HPV was 96.4%	samples were collected from women aged ≥50 years attending for a colposcopy (following a speculum HPV-positive screening result) or women aged ≥35 years (with confirmed cervical intraepithelial neoplasia (CIN) 2+), and women aged 50 64 years attending routine screening.	0.833	N/A	Self-Sampling Sensitivity (%): 83.3% for detecting CIN2+ (Abnormal patients)
67	The sensitivity and specificity of self-sampled HPV test was 84.0% and 88.4%, respectively.	/	0.84	N/A	Self-Sampling Sensitivity (%): 84.0% (Normal patients)

## Sheet: (detection rate)
Study ID	Detection rate of HPV in self-sampling group	Detection rate of HPV in pap smear group	Self sampling detection rate (final %)	pap smear detection rate (final %)	Note for included values from each study... (% detection + CIN2, CIN2+, CIN3, etc..)	Note for included studies (with no values)			# of not mentioned: 35 studies								# of studies with % of detection for HPV (CIN2+, LSIL, HSIL, HSIL+ ASCUS, ASCUS+, AGC, ASCH, or ACG or hr-HPV) from HPV positive women or with abnormal cytology: 16
1	In some of the included studies: "APTIMA was similarly sensitive (relative sensitivity 0·98 [95% CI 0·95-1·01]) and slightly more specific (1·03 [1·02-1·04]) for CIN2+. The relative sensitivity for CIN3+ was 0·98 (95% CI 0·95-1·01)." . In other included studies: "In self-collected samples, APTIMA was less sensitive for CIN2+ (relative cross-sectional sensitivity 0·84 [0·74-0·96]) but similarly sp…	indirectly mentioned alongside the self sampling group, if given access the full article it might specifically mention it.	--	--	--	--
2	not mentioned	not mentioned	--	--	--	--
3	Sensitivity/Specificity of hr-HPV testing for CIN 2+ detection in clinician-taken smears was 89.7%/42.9%, in self-taken smear 89.7%/42.9% for the Evalyn-Brush, 82.8%/71.4% for the FLOQSwab	No pap smear used	--	--	--	--
4	not mentioned	not mentioned	--	--	--	--							# of studies with % of detection for CIN2+ from abnormal cytology : 4
5	not mentioned	not mentioned	--	--	--	--			Number of studies with % of detection for HPV from normal patients: 15 studies								# of studies with % of detection for HPV (CIN2+, LSIL, HSIL, HSIL+ ASCUS, ASCUS+, AGC, ASCH, or ACG or hr-HPV) from HPV positive women or with abnormal cytology: 16
6	95.5% hrHPV positive	95.5% hrHPV positive	0.955	0.955	% of detection for CIN2+ from abnormal cytology (so we expected high rates)				Self sampling HPV detection rate	Pap smear HPV detection rate							Self sampling HPV detection rate (patients with abnormal cytology or HPV-positive)	Pap smear HPV detection rate (patients with abnormal cytology or HPV-positive)
7	HPV positivity and detection rate of precancer (CIN3+) were lower in the self-sampling compared with the clinician-sampling group (adjusted ORs of 0.65 and 0.86, respectively)	as mentioned in the field to the left				Dectection rate for CIN3+ was lower in self-sampling than cliniician-sampling			0.146	0.127							0.955	0.955
8	Doesn't mention explicitly mention Detection rate	Doesn't mention explicitly mention Detection rate	--	--	--	--			0.397	0.368							0.666	0.533
9	Doesn't mention explicitly mention Detection rate	Doesn't mention explicitly mention Detection rate	--	--	--	--			0.074	0.093							0.855	1
10	Not specified in discrete percentages in the study. However, it was implied through the cost-effectiveness and QALYs gained. Self-sampling strategies, particularly without triage, were highlighted as yielding the most cost savings and the highest incremental QALYs (420 QALYs).	Not directly specified in terms of rates	--	--	--	--			0.416	0.375							0.861	0.857
11	Vaginal self-samples suspended in ThinPrep®PreservCyt®: 66.6% (20/30), 63.3% (19/30), and 66.6% (20/30) were hrHPV positive with Anyplex™II HPV28, Papilloplex® High Risk HPV, and HPV OncoPredict assays, respectively. Vaginal self-samples suspended in eNat®: 66.6% (20/30) were hrHPV positive with all three assays.	Cervical samples: 56.6% (17/30) were hrHPV positive with Anyplex™II HPV28, 53.3% (16/30) with HPV OncoPredict, and 50% (15/30) with Papilloplex® High Risk HPV.	0.666	0.533	% detection for LSIL, HSIL, ASCUS, AGC, ASCH, or ACG from from abnormal cytology patients				0.282	N/A							0.6945	not applicable
12	Not explicitly mentioned	Not relevant	--	--	--	--			0.098	0.062							0.404	0.6
13	Vaginal self-samples: 85.5% sensitivity for detecting HSIL/AIS/cancer	Routine cytology: 81.7% sensitivity for detecting HSIL/AIS/cancer, and Clinician-taken cervical HPV samples: 100% sensitivity for detecting HSIL/AIS/cancer	0.855	1	% of dectection for HSIL/AIS/cancer from abnormal screening results				0.1	0.08							0.964	N/A
14	Not directly mentioned in terms of detection rate	Not directly mentioned in terms of detection rate	-	-	--	-			0.25	0.209							0.846	1
15	At 6 months: Sensitivity for HSIL+ detection was 88.9%, At 12 months: Sensitivity for HSIL+ detection was 83.3%	At 6 months: Sensitivity for HSIL+ detection was 100%, At 12 months: Sensitivity for HSIL+ detection was 71.4%	0.861	0.857	% of dectection for HSIL+ from HPV-positive women				10 %	7.5 %							0.86	1
16	Self-sampling for HPV testing is as sensitive but slightly less specific than clinician-taken samples	HPV screening is more sensitive than cytology for detecting precancers but less specific	?	?	?	?			0.124	0.114							0.96	0.93
17	Not specifically detailed in the text	Not specifically detailed in the text	--	--	--	--			0.435	0.367							0.5	0.51
18	Not specifically detailed in the text	Not specifically detailed in the text	--	--	--	--			0.171	0.045							0.291	0.394
19	0.146	0.127	0.146	0.127	% of dectection for HPV from normal pateint				0.237	0.179							0.839	0.871
20	DF: 71.7% WD: 71.7% QT: 69.3% HS: 65.1% Urine: 76.0%	Not applicable	DF: 71.7% WD: 71.7% QT: 69.3% HS: 65.1% avg: 69.45%	not applicable	% of detection using 4 self-sampling methods from HPV-positve women				0.153	0.135							0.747	0.704
21	40.4% (55/136)	61.0% (83/136)	0.404	0.6	% of detection for HPV from HPV positive women				0.294	0.239							0.687	0.714
22	Vaginal self-sampling: 96.4% sensitivity Urine self-sampling: 83.9% sensitivity​	Not specifically detailed in the text	0.964	N/A	% of detection using vaginal self-sampling method from HPV-positve women												0.95	0.95
23	Detection Rate of HPV in Self-Sampling Group: 84.6% sensitivity for CIN2+ (95% CI 59.1–96.7)	Detection Rate of HPV in Pap Smear Group: 100% sensitivity for CIN2+ (95% CI 82.7–100)	0.846	1	% of detection for CIN2+ from abnormal cytology
24	Detection rate of HPV in self-sampling group: 39.7% (27/68)	Detection rate of HPV in Pap smear group: 36.8% (25/68)	0.397	0.368	% of detection for HPV from normal patients
25	7.4% positive hrHPV test result​	9.3% positive hrHPV test result​	0.074	0.093	% of detection for HPV from normal patients
26	HPV Test Results by Device: Viscose Swab: Negative: 62.3% Positive for type 16 ± other types: 9.8% Positive for type 18 ± other types: 4.9% Positive for only other types: 23.0% Iune Device: Negative: 57.4% Positive for type 16 ± other types: 11.5% Positive for type 18 ± other types: 4.9% Positive for only other types: 26.2% Mía by Xytotest®: Negative: 57.6% Positive for type 16 ± other types: 13.…	HPV Test Results (Conventional Sampling) Negative: 62.5% (75 out of 120 samples) Positive for Type 16 ± other types: 9.2% (11 out of 120 samples) Positive for Type 18 ± other types: 3.3% (4 out of 120 samples) Positive for only other types: 25.0% (30 out of 120 samples)​ Cytological Results (Conventional Sampling) Negative: 59.4% ASC-US and LSIL: 33.3% ASC-H, AIS, and HSIL: 7.3%​	0.416	0.375	% of detection for HPV from normal patients How I calcuated this one: averaged the positive detection rates across the four devices. For each device, sum the positive rates and divide by 4.
27	not specifically mentioned	not specifically mentioned	--	--	--	--
28	0.86	1	0.86	1	% detection for LSIL from abnormal cases
29	not mentioned	not mentioned	--	--	--	--
30	Concordance of hr-HPV mRNA detection between self-collected stored wet (sc-WET) and dry (sc-DRY) Overall, approximately one-third of women tested positive for hr-HPV mRNA using the self-collected sampling stored wet (n=147, 37%) or stored dry (n=127; 32%). A quarter of women (97/387) were positive for hr-HPV mRNA with both sc-WET and sc-DRY samples; 12% (47/387) were hr-HPV mRNA positive using th…	not mentioned	0.282	N/A	% detection for hr-HPV in normal patients (only self-sampling)				Number of studies with % of detection for HPV from normal patients: 14 studies (area chart)								# of studies with % of detection for HPV (CIN2+, LSIL, HSIL, HSIL+ ASCUS, ASCUS+, AGC, ASCH, or ACG or hr-HPV) from HPV positive women or with abnormal cytology: 14
31	0.294	not mentioned	?	?	?	?			Self sampling HPV detection rate	Pap smear HPV detection rate							Self sampling HPV detection rate (patients with abnormal cytology or HPV-positive)	Pap smear HPV detection rate (patients with abnormal cytology or HPV-positive)
32	CIN2: 96%	CIN2: 93%	0.96	0.93	% of detection for CIN2+ from abnormal cytology				0.146	0.127							0.955	0.955
33	n/a	n/a	--	--	--	--			0.397	0.368							0.666	0.533
34	Differences between test positivity (HPV-hr) and test negativity were higher in the self-test group (Fig. 1, 2). In clinician-taken test samples, there was a complete concordance of the 4 HPV-hr test results in 83 of 106 patients (78%). In the self-test samples, a concordance of the 4 test results was only found in 72 patients (68%).	mentioned in the field to the left.	--	--	--	--			0.074	0.093							0.855	1
35	0.5	0.51	0.5	0.51	% detection for ASCUS+ from abnormal cytology				0.416	0.375							0.861	0.857
36	9.8% (19 out of 194)	6.2% (12 out of 194)	0.098	0.062	% of dectection for HPV from normal pateint				0.098	0.062							0.404	0.6
37	0.291	0.394	0.291	0.394	% detection for ASCUS+ from abnormal cytology				0.1	0.08							0.846	1
38	10.0% (204/2049; 95% CI, 8.7–11.3)	8.0% (163/2049; 95% CI, 6.9–9.2)	0.1	0.08	% of dectection for HPV from normal pateint				0.25	0.209							0.86	1
39	vsc-DRY: 24.5% (177/722) vsc-LIQ: 25.5% (184/722)​	20.9% (151/722)​	0.25	0.209	% of dectection for HPV from normal pateint				10 %	7.5 %							0.96	0.93
40	Evalyn®Brush: Anyplex™ II HPV28: 209 out of 232 (90.1% positivity rate) Cobas® 4800: 196 out of 232 (84.5% positivity rate) Xpert® HPV: 197 out of 232 (84.9% positivity rate) FLOQSwabs™: Anyplex™ II HPV28: 193 out of 232 (83.2% positivity rate) Cobas® 4800: 185 out of 232 (79.7% positivity rate) Xpert® HPV: 188 out of 232 (81.0% positivity rate)	Anyplex™ II HPV28: 207 out of 232 (89.2% positivity rate) Cobas® 4800: 200 out of 232 (86.2% positivity rate) Xpert® HPV: 199 out of 232 (85.8% positivity rate)	83.9% overall average HPV positivity rate for Evalyn®Brush and FLOQSwabs™ across the different testing methods	0.871	% detection for hrHPV from abnormal cases				0.124	0.114							0.5	0.51
41	10 %	7.5 %	10 %	7.5 %	% of dectection for HPV from normal pateint				0.435	0.367							0.291	0.394
42	"Because of the low rates of abnormal cytology (3 cases of atypical squamous cells-undetermined significance), we only identified that the detection rate of HPV 16/18 was 2.0% for vaginal self -sampling and 1.5% for urine sampling"	not mentioned. Study foucsed on the satisfaction of tests.	--	--	--	--			0.171	0.045							0.839	0.871
43	74.7% positive high-risk HPV Positive for 16, 18: 31.4%	70.4% positive high-risk HPV Positive for 16, 18: 25.1%	0.747	0.704	% detection for hrHPV from HPV-positive or abnormal cytology				0.237	0.179							0.747	0.704
44	For self-sampling: 66 positive using SPF10 59 positive using GP5+/6+ Note: "SPF10 and GP5+/6+ are two types of primers used in polymerase chain reaction (PCR) testing for the detection of human papillomavirus (HPV)."	For clinician-taken samples: 68 positive using SPF10 62 positive using GP5+/6+	0.687	0.714	% of detection for CIN2+ from abnormal cytology				0.153	0.135							0.687	0.714
45	not mentioned	not mentioned	--	--	--	--			0.294	0.239							0.95	0.95
46	Not applicable in this study	Not applicable in this study	--	--	--	--
47	not directly mentioned	not directly mentioned	--	--	--	--
48	63% of participants had at least one positive HPV test	Clinician-collected HPV mRNA test was used as the comparator	--	--	--	--
49	12.4% (home-collected samples)	11.4% (clinician-collected samples)	0.124	0.114	% of dectection for HPV from normal pateint
50	0.435	0.367	0.435	0.367	% of dectection for HPV from normal pateint (women with HIV-infecton)
51	not mentioned	not mentioned	-	--	--	--
52	17.1% (95% CI, 16.1–18.23%)	4.5% (95% CI, 4.0–5.0%)	0.171	0.045	% of dectection for HPV from normal pateint
53	6.3% HPV positive in the first test.	Not directly comparable, focus was on the detection of CIN2+.	--	--	--	--
54	0.7	0.5	?	?	?	?
55	not mentioned	not mentioned	--	--	--	--
56			--	--	--	--
57	23.7% (75 women) were HPV-positive in the self-sampling group .	17.9% (55 women) had an ASC-US or worse result, with 25% of them testing HPV-positive .	0.237	0.179	% of dectection for hr-HPV from normal pateint
58	95% sensitivity for detecting HPV 16/18 positive cervical cancer using self-collected lavage samples.	95% sensitivity for detecting HPV 16/18 positive cervical cancer using cytobrush samples.	0.95	0.95	% detection for hrHPV from HPV-positive or abnormal cytology
59	Tampon method: 15.3% positive (with 27% insufficient samples) Swab method: 15.3% positive	13.5% positive for high-risk HPV subtypes.	0.153	0.135	% of dectection for hr-HPV from normal pateint
60	Sensitivity of 92.6% for detecting HPV-positive samples.	Sensitivity of 95.9% for detecting HPV-positive samples.	--	--	--	--
61	not mentioned	not mentioned	--	--	--	--
62	Not explicitly provided, focused more on concordance rates	Not explicitly provided, focused more on concordance rates	--	--	--	--
63	12.7% of analyzed samples were positive for high-risk HPV	not applicable	--	--	--	--
64	not mentioned	not mentioned	--	--	--	--
65	Higher in self-collected samples than in clinician-collected samples among HIV-positive women (61.5% vs. 48.2%) and HIV-negative women (25.1% vs. 16.3%).	Specific figures not provided, but clinician-collected samples showed lower detection rates compared to self-samples.	--	--	--	--
66	might be mentioned, but not clear	might be mentioned, but not clear	--	--	--	--
67	The prevalence of high-risk HPV was 29.4% among self-sampled specimen	23.9% among clinician collected specimens.	0.294	0.239	% of dectection for HPV from normal pateint (women with HIV-infecton)

## Sheet: (ppv + specifcity)
	specificity in no known history of pos screening/cytology (mainly CIN 2/HSIL)							PPV in normal cytology/ HIV POS			Values for area graph						Patient satisfaction
ID	self-sample (%)	clinical sample (%)					ID	self-sampling (%)	pap smear (%)		self-sampling (%)	clinical sample (%)					not mentioned: 26 (39%)
2	84	86	Detecting cervical precancer and reaching underscreened women by using HPV testing on self samples: updated meta-analyses.				8	18 (13.2 to 23.7)	39.8 (31.5 to 48.7)	Performance of HPV testing, Pap smear and VIA in women attending cervical cancer screening in Kilimanjaro region, Northern Tanzania: a cross-sectional study nested in a cohort.	18	39.8
8	59.3	82.1	Performance of HPV testing, Pap smear and VIA in women attending cervical cancer screening in Kilimanjaro region, Northern Tanzania: a cross-sectional study nested in a cohort.				14 (6 months)	14.3	19.6	Self- versus physician-collected samples for the follow-up of human papillomavirus-positive women in sub-Saharan Africa.	14.3	19.6				mentioned PERCENTAGE SS PREFERENCE/DO AGAIN AGAINST CLINICAL SAMPLING	6, 11, 13, 16, 23, 27, 20 (weakest), 36, 37, 39, 45, 48, 49, 59, 54, 63 (weakest) (around 26%)
17	72.2	80.6	Cost-Effectiveness of Offering Cervical Cancer Screening with HPV Self-Sampling among African-American Women in the Mississippi Delta.				14 (12 months)	10.4	16.1		10.4	16.1
											26.5	26					would do self sampling again, prefer self sampling over clinical
											22.2	15.6				ID	self sample (%)	clinical sample (%)
											38.5	28.6				6	29	11.9	HPV-based Cervical Cancer Screening on Self-samples in the Netherlands: Challenges to Reach Women and Test Performance Questions.
							34	26.5	26	Evaluation of the concordance in HPV type between self- and physician-collected samples using a brush-based device and a PCR-based HPV DNA test in Japanese referred patients with abnormal cytology or HPV infection.	8.8	10.6				11	57	41	Cervical cancer screening using HPV tests on self-samples: attitudes and preferences of women participating in the VALHUDES study.	in favor: 4, 14, 15, 20, 21, 25, 26, 28, 34, 35, 38(majority did not), 40, 41, 43, 46, 47, 58, 61, 62, 63 (even though opted for doctor)
29 AVERAGE TAKEN for SS (stored dry/wet)	74.5	77	High-risk Human Papillomavirus Messenger RNA Testing in Wet and Dry Self-collected Specimens for High-grade Cervical Lesion Detection in Mombasa, Kenya.								100	100				13 (REST DIDNT SPECIFY A PERFERENCE)	51	19	Preference for Human Papillomavirus Self-Collection and Papanicolaou: Survey of Underscreened Women in North Carolina.	against: 2
							51	22.2	15.6	Equal prevalence of severe cervical dysplasia by HPV self-sampling and by midwife-collected samples for primary HPV screening: a randomized controlled trial	80	76.5				16	88	22	Women's experience with home-based self-sampling for human papillomavirus testing.		WHERE A SPECIFIC CLINICAL PREFERNCE WASNT PROVIDED, BY LOGIC 100% WAS SUBSTRACTED FORM THE SELF SAMPLE PREFERENCE
							53	38.5	28.6	Effectiveness of self-sampling human papillomavirus test on precancer detection and screening uptake in Japan: The ACCESS randomized controlled trial	34.5	38.6				23	65.6	34.4	Can Human Papillomavirus DNA Self-sampling be an Acceptable and Reliable Option for Cervical Cancer Screening in Female Sex Workers?
48	91.1	92.2	Self-Collection by Mail to Test for Human Papillomavirus and Sexually Transmitted Infections				55	8.8	10.6	Vaginal Self-Sampling for Human Papillomavirus Infection as a Primary Cervical Cancer Screening Tool in a Haitian Population	10.9	10.8				27	90	10	HPV self-sampling in Japanese women: A feasibility study in a population with limited experience of tampon use.
							63 (FILTER PAPER)	100	100	Diagnostic study of human papillomavirus DNA detection in cervical and vaginal samples using the filter paper card	40.7	48.1				29 (VIBA AND EVALYN BRUSH)	36	64	High-risk Human Papillomavirus Messenger RNA Testing in Wet and Dry Self-collected Specimens for High-grade Cervical Lesion Detection in Mombasa, Kenya.
											16.5	19				36	58.8	42.2	The Role of Self-Collection by Vaginal Lavage for the Detection of HPV and High-Grade Intraepithelial Neoplasia.	preference were result accuracy and provider knowledge/experience.
63	100	100	Diagnostic study of human papillomavirus DNA detection in cervical and vaginal samples using the filter paper card								27.8	44.9				37	62.8	37.2	High-risk human papillomavirus detection in self-sampling compared to physician-taken smear in a responder population of the Dutch cervical screening: Results of the VERA study.
64	77.5	86.9	Performance of Xpert HPV on Self-collected Vaginal Samples for Cervical Cancer Screening Among Women in South Africa								10.7	12.2				39	87	13	Safety and acceptability of human papillomavirus testing of self-collected specimens: A methodologic study of the impact of collection devices and HPV assays on sensitivity for cervical cancer and high-grade lesions.
																45	82	18	Feasibility of At-Home Self-Sampling for HPV Testing as an Appropriate Screening Strategy for Nonparticipants in Switzerland: Preliminary Results of the DEPIST Study		61% of the papers mentioned patient satisfaction, and around 90% of those displayed positive data for SS over CS. 40% of the papers mentioning satisfaction gave a percentage of women preferring self-sampling over clinical sampling. With these values, we were able to plot an area graph to indicate which is overall preferred as a result of satisfaction. For papers that mentioned self-sampling prefe…
																48	96.3	3.7	Self-Collection by Mail to Test for Human Papillomavirus and Sexually Transmitted Infections
							7	80	76.5	A positive HPV test with positive p16/Ki-67 double staining in self-sampled vaginal material is an accurate tool to detect women at risk for cervical cancer.						49	82	18	Acceptability and Accuracy of Cervical Cancer Screening Using a Self-Collected Tampon for HPV Messenger-RNA Testing among HIV-Infected Women in South Africa
self-sample (%)	clinical sample (%)						20 CIN2	34.5	38.6	Accuracy of self-collected human papillomavirus samples from Japanese women with abnormal cervical cytology.						54	80.2	19.8	Acceptability of Human Papillomavirus Self-Sampling for Cervical Cancer Screening in an Indigenous Community in Guatemala
84	86						20 CIN3	10.9	10.8							59	57.7	42.3	Self-collected vaginal sampling for the detection of genital human papillomavirus (HPV) using careHPV among Ghanaian women
59.3	82.1						22	40.7	48.1	High-Risk Types of Human Papilloma Virus DNA Testing in Women with False Negative Cytology.						63	5	95	Diagnostic study of human papillomavirus DNA detection in cervical and vaginal samples using the filter paper card
72.2	80.6
74.5	77						29 AVG TAKEN IN WET/DRY SS	16.5	19	High-risk Human Papillomavirus Messenger RNA Testing in Wet and Dry Self-collected Specimens for High-grade Cervical Lesion Detection in Mombasa, Kenya.
91.1	92.2
100	100						36	27.8	44.9	The Role of Self-Collection by Vaginal Lavage for the Detection of HPV and High-Grade Intraepithelial Neoplasia.
77.5	86.9						46	10.7	12.2	Evaluation of a New APTIMA Specimen Collection and Transportation Kit for High-Risk Human Papillomavirus E6/E7 Messenger RNA in Cervical and Vaginal Samples
	specificity in history of abnormal cytology/pos screening
ID	self sample	physician
7	31	31.1	A positive HPV test with positive p16/Ki-67 double staining in self-sampled vaginal material is an accurate tool to detect women at risk for cervical cancer.														x difference is constant for all tables				x-axis	y-axis	area
12	48.1	49	Self-sampling with HPV mRNA analyses from vagina and urine compared with cervical samples.														x-axis	y-axis	area		1	29	43
14 (6 months)	66.9	74.3	Self- versus physician-collected samples for the follow-up of human papillomavirus-positive women in sub-Saharan Africa.														1	11.9	26.45		2	57	54
14 (12 months)	65.6	79															2	41	30		3	51	69.5
																	3	19	20.5		4	88	76.8
20 (CIN2+)	65.4	51	Accuracy of self-collected human papillomavirus samples from Japanese women with abnormal cervical cytology.														4	22	28.2		5	65.6	77.8
20 (CIN3)	61.4	41.7					30% of papers mentioned PPV, around 66% of papers did not, and only 2 papers (3%) gave an indirect measure. Of the 30% that mentioned PPV, 50% gave a value for both clinical and self-sampling methods, which were used to plot the area graph. PPV, similarly to NPV, would appear slightly higher overall in pap smear testing than in self-sampling as shown on the graph. The estimated area calculated in…										5	34.4	22.2		6	90	63
21*** (missed abrnomality)	68% (95% CI 54.3–79.6)	72% (95% CI 58.6–83.0)	High-Risk Types of Human Papilloma Virus DNA Testing in Women with False Negative Cytology.														6	10	37		7	36	47.4
29 AVERAGE TAKEN for self sample (WET/DRY)	62.5	61	High-risk Human Papillomavirus Messenger RNA Testing in Wet and Dry Self-collected Specimens for High-grade Cervical Lesion Detection in Mombasa, Kenya.														7	64	53.1		8	58.8	60.8
																	8	42.2	39.7		9	62.8	74.9
																	9	37.2	25.1		10	87	84.5
34	58.1	57	Evaluation of the concordance in HPV type between self- and physician-collected samples using a brush-based device and a PCR-based HPV DNA test in Japanese referred patients with abnormal cytology or HPV infection.				not mentioned count:	qualitative measure count:									10	13	15.5		11	82	89.15
36	71.7	71.3	The Role of Self-Collection by Vaginal Lavage for the Detection of HPV and High-Grade Intraepithelial Neoplasia.				44	2									11	18	10.85		12	96.3	89.15
43 SPF10	35	33	HPV testing in first-void urine provides sensitivity for CIN2+ detection comparable with a smear taken by a clinician or a brush-based self-sample: cross-sectional data from a triage population.				not mentioned article ID's	qualitative measure article ID's (for additional comments)									12	3.7	10.85		13	82	81.1
43 GP5+/6+	43	39					1, 3,4,9 10, 11,12, 13, 15 16,17, 19 21 24, 25, 27 ,28 ,31,33 35 37 38,39,40,41,42,,43,44,45, 48 49,,50, 52 54 56 57 58 59 60 61 62 64 65 66	6, 32									13	18	18.9		14	80.2	68.95
46****	60.1% (95% CI: 55.9–64.1)	68.4% (95% CI: 64.4–72.2)	Evaluation of a New APTIMA Specimen Collection and Transportation Kit for High-Risk Human Papillomavirus E6/E7 Messenger RNA in Cervical and Vaginal Samples														14	19.8	31.05		15	57.7	31.35
64	44	59.7	Performance of Xpert HPV on Self-collected Vaginal Samples for Cervical Cancer Screening Among Women in South Africa														15	42.3	68.65		16	5
							x	y	area		x	y	area				16	95				sum ESTIMATE area patient satisfaction=	1011.4
self sample (%)	clinical sample (%)						1	39.8	29.7		1	18	16.15					ESTIMATE	438.05
31	31.1						2	19.6	17.85		2	14.3	12.35
48.1	49						3	16.1	21.05		3	10.4	18.45
66.9	74.3						4	26	20.8		4	26.5	24.35
65.6	79						5	15.6	22.1		5	22.2	30.35
65.4	51						6	28.6	19.6		6	38.5	23.65
61.4	41.7						7	10.6	55.3		7	8.8	54.4
68	72						8	100	88.25		8	100	90
62.5	61						9	76.5	57.55		9	80	57.25
58.1	57						10	38.6	24.7		10	34.5	22.7
71.7	71.3						11	10.8	29.45		11	10.9	25.8
35	33						12	48.1	33.55		12	40.7	28.6
43	39						13	19	31.95		13	16.5	22.15
60.1	68.4						14	44.9	28.55		14	27.8	19.25
44	59.7						15	12.2			15	10.7
								total area for cs	480.4			total area for ss	445.45
not mentioned count:	qualitative measure count:
26	12
not mentioned article ID's	qualitative measure article ID's (for additional comments)
4 10 11 13 16 26 27 28 33 37 39 40 41 42 44 45 52 53 54 55 56 57 60 61 62	1, 3, 5, 6, 15, 21, 24, 31,, 35, 50, 51, 59,
of all the studies, a percentage (around 44%) of the papers provided direct percentages for the specificity measure. However, only a percentage (62%) of those papers were able to provide specificity for BOTH self-sample and clinical sampling detailing a direct comparison - these were used to plot area graphs for specificity in abnormal (14 points) and normal (7 points) cytology women. A percentag…
ID 10 needs to be checked
SS ONLY ID'S: 19, 20, 24. 26, 31 33 48 50 59 67
SS ONLY COUNT: 19
	x	y	area			x	y	area
	1	31	39.55			1	84	71.65
	2	48.1	57.5			2	59.3	65.75
	3	66.9	66.25			3	72.2	73.35
	4	65.6	65.5			4	74.5	82.8
	5	65.4	63.4			5	91.1	95.55
	6	61.4	64.7			6	100	88.75
	7	68	65.25			7	77.5
	8	62.5	60.3				sum of ss area in normal cyt	477.85
	9	58.1	64.9
	10	71.7	53.35
	11	35	39			x	y	area
	12	43	51.55			1	86	84.05
	13	60.1	52.05			2	82.1	81.35
	14	44				3	80.6	78.8
		sum of SS in abnormal	743.3			4	77	84.6
						5	92.2	96.1
						6	100	93.45
	x	y	area			7	86.9
	1	31.1	40.05				sum of cs area in normal cyt	518.35
	2	49	61.65
	3	74.3	76.65
	4	79	65
	5	51	46.35
	6	41.7	56.85
	7	72	66.5
	8	61	59
	9	57	64.15
	10	71.3	52.15
	11	33	36
	12	39	53.7
	13	68.4	64.05
	14	59.7
		sum of CS in abnormal	742.1

## Sheet: General table
	specificty in normal cytology			specificity in abnormal cytology			ppv			patient preference			npv
	self-sample (%)	clinical sample (%)		self sample (%)	clinical sample (%)		self-sampling (%)	clinical sample (%)		self sample (%)	clinical sample (%)		Self Sampling NPV %	Pap smear NPV %
	84	86		31	31.1		18	39.8		29	11.9		0.9908	0.9917
	59.3	82.1		48.1	49		14.3	19.6		57	41		0.643	0.667
	72.2	80.6		66.9	74.3		10.4	16.1		51	19		0.833	1
	74.5	77		65.6	79		26.5	26		88	22		0.99	1
	91.1	92.2		65.4	51		22.2	15.6		65.6	34.4		0.84	1
	100	100		61.4	41.7		38.5	28.6		90	10		0.79	0.79
	77.5	86.9		68	72		8.8	10.6		36	64		0.944	1
				62.5	61		100	100		58.8	42.2		0.651	0.608
				58.1	57		80	76.5		62.8	37.2		1	1
				71.7	71.3		34.5	38.6		87	13		0.868	0.931
				35	33		10.9	10.8		82	18		0.919	0.917
				43	39		40.7	48.1		96.3	3.7		0.988	0.984
				60.1	68.4		16.5	19		82	18		0.591	0.684
				44	59.7		27.8	44.9		80.2	19.8
							10.7	12.2		57.7	42.3
										5	95
General Table:
specificty in normal cytology		specificity in abnormal cytology		ppv		npv		patient preference		sensitivity in normal patients		sensitivity in abnormal cytology		Detection rate in normal patients		Detection rate in normal patients
self-sample (%)	clinical sample (%)	self sample (%)	clinical sample (%)	self-sampling (%)	clinical sample (%)	Self Sampling NPV %	Pap smear NPV %	self sample (%)	clinical sample (%)	self-sample (%)	clinical sample (%)	self-sample (%)	clinical sample (%)	self-sample (%)	clinical sample (%)	self-sample (%)	clinical sample (%)
84	86	31	31.1	18	39.8	0.9908	0.9917	29	11.9	0.77	0.93	0.955	0.955	0.146	0.127	0.955	0.955
59.3	82.1	48.1	49	14.3	19.6	0.643	0.667	57	41	0.625	0.828	0.941	0.9375	0.397	0.368	0.666	0.533
72.2	80.6	66.9	74.3	10.4	16.1	0.833	1	51	19	0.953	0.963	0.855	0.8175	0.074	0.093	0.855	1
74.5	77	65.6	79	26.5	26	0.99	1	88	22	0.88	0.94	0.861	0.857	0.416	0.375	0.861	0.857
91.1	92.2	65.4	51	22.2	15.6	0.84	1	65.6	34.4	0.96	1	0.594	1	0.098	0.062	0.404	0.6
100	100	61.4	41.7	38.5	28.6	0.79	0.79	90	10	0.99	0.99	0.667	1	0.1	0.08	0.846	1
77.5	86.9	68	72	8.8	10.6	0.944	1	36	64	0.82	0.91	0.928	0.928	0.25	0.209	0.86	1
		62.5	61	100	100	0.651	0.608	58.8	42.2	0.79	0.94	0.846	1	10 %	7.5 %	0.96	0.93
		58.1	57	80	76.5	1	1	62.8	37.2	1	1	0.815	0.93	0.124	0.114	0.5	0.51
		71.7	71.3	34.5	38.6	0.868	0.931	87	13	0.75	0.929	1	1	0.435	0.367	0.291	0.394
		35	33	10.9	10.8	0.919	0.917	82	18	0.883	0.924	0.5	0.815	0.171	0.045	0.839	0.871
		43	39	40.7	48.1	0.988	0.984	96.3	3.7	0.86	0.772	0.878	0.9363	0.237	0.179	0.747	0.704
		60.1	68.4	16.5	19	0.591	0.684	82	18	0.667	0.778	0.918	0.902	0.153	0.135	0.687	0.714
		44	59.7	27.8	44.9			80.2	19.8	0.9465	0.881	0.975	0.975	0.294	0.239	0.95	0.95
				10.7	12.2			57.7	42.3			0.867	0.9663
								5	95

## Sheet: Sheet19
Study ID	Inclusion Criteria	Comparative statistics	Statistical significance of findings		Kappa vallue	kappa avg			Significance
1	Studies published before august 2021, "Eligible studies had to contain comparative data addressing one of our three clinical questions."	Not mentioned	P-values werent mentioned, however CI was used. Moreover, QUADAS and ROBINS-1 tools were used to assess the quality of diagnostic test accuracy studies and cohort studies.		0.62				P < .001 (HP group and SC group)
2	Studies that compared Self sample vs Clinician sample. A Minimum of 400 women in the study. There is alot more info in the "Criteria for study selection" section	the risk of bias was never assessed as high	Not really mentioned		0.52				p < 0.001 (HPV mRNA test sensitivity for vaginal self-samples)
3	not explicitly mentioend, but it should be along the lines of women with a recent history of abnormal cervical cytology	not mentioned	Not really mentioned		0.801				p=0.003 (Difficulty finding time for HPV self-testing vs. Pap testing)
4	Sources in English and French were included due to the research team’s linguistic capabilities. 1993 was chosen as the cut-of year as that was when the frst study on HPV self-sampling was published	Not mentioned	None mentioned		0.753				p=0.02 (Fear of self-test results vs. Pap test results)
5	not specified	Not mentioned	None mentioned		0.568				p=0.001 (Physical discomfort and pain from self-collection vs. Pap testing)
6	not specified	Ratios and OR mentioned. "The following population categories were more likely to self-sample than undergo clinician sampling: never screened women (29.0% vs. 11.9%, in the self-sampling and clinician-sampling groups, respectively, ratio = 2.43); the youngest ages 30–39 years (ratio = 1.29) and oldest group ages 60 years versus the middle age groups (ratio = 1.06); unemployed and supported by soc…	None mentioned		0.646				p=1.000 (Sensitivity of Self-HPV and Dr-HPV for LSIL+ at 6 months)
7	Participants were referred for colposcopy on account of the presence of the following cytological changes on the basis of the 2014 Bethesda system	Not provided in the text	Strong significance: in the HP group (P < .001) and in the SC group (P < .001)		0.82				p=0.043 (Specificity of Self-HPV and Dr-HPV for LSIL+ at 6 months)
8	inclusion criteria were being aged 25–60 years, and no history of premalignant or cervical cancer.	Not mentioned	Not really mentioned		0.58				p=1.000 (Sensitivity of Self-HPV and Dr-HPV for HSIL+ at 6 months)
9	Women aged 30-65 years in urban and rural China	Used incremental cost-effectiveness ratios (ICERs) to compare different strategies. All screen-and-treat strategies, including self-sampling, were found to be cost-effective compared to the current strategies. The ICERs for self-HPV without triage ranged from -$3214.1 to $8900.2 per QALY gained.	The study did not provide p-values or confidence intervals for detection rates. Instead, it focused on the cost-effectiveness and health benefits, with self-HPV without triage being identified as the optimal strategy with the most significant cost savings and QALYs gained.		0.74				p=1.000 (Sensitivity of Self-HPV and Dr-HPV for HSIL+ at 12 months)
10	Women referred to colposcopy for a recent abnormal Pap smear, reported as LSIL, HSIL, ASCUS, AGC, ASCH, or ACG	Not specifically provided in the form of odds ratios or relative risks, but the study demonstrated substantial agreement between the self-sampling methods and the clinician-collected samples.	Substantial agreement for hrHPV detection between vaginal self-samples suspended in both media and cervical samples with Cohen's kappa statistics - Anyplex™II HPV28: 90.0% (κ=0.791), Papilloplex® High Risk HPV: 83.3% (κ=0.667), HPV OncoPredict: 90.0% (κ=0.796)		0.69				p=0.002 (Specificity of Self-HPV and Dr-HPV for HSIL+ at 12 months)
11	Women referred to colposcopy because of previous cervical abnormalities (Atypical Squamous Cell where a High-grade squamous lesion cannot be excluded [ASC-H] or worse squamous cervical abnormalities, Atypical Glandular Cells [AGC], repeated low-grade abnormalities or HPV+ Atypical Squamous cells of Undetermined Significance [ASC-US]), and those age 25–64 years	Not provided in the text	Not provided in the text		0.86				P = 0.527 (No significant difference in detection of HPV DNA between two sample collection types)
12	Women attending the women’s clinic in Lund for colposcopy due to abnormal screening results or monitoring of dysplasia following previous excisional treatment	Not provided in the text	The sensitivity of the HPV mRNA test for vaginal self-samples was statistically significant with a p-value < 0.001		0.83				p < 0.05 (Statistically significant vs. pHPV)
13	Women who had not received a Pap test in the previous 4 years, Lived in North Carolina, Not pregnant, Had not undergone a hysterectomy, Aged between 30–65 years, and Met one of the following income criteria - Had children that qualified for the federal school lunch program, Had Medicaid or Medicare Part B insurance, Were uninsured and living at or below 200% of the federal poverty level	Not detailed in the text	Women reported less difficulty finding time for HPV self-testing (13%) compared to Pap testing (31%; p=0.003), More women reported being afraid of the self-test results (50%) compared to Pap test results (36%; p=0.02), Less physical discomfort and pain from self-collection than Pap testing (discomfort: 18% self; 48% Pap; pain: 8% self; 30% Pap, p=0.001)		0.73				P < 0.001 (Statistically significant vs. pHPV)
14	Women aged 30–49 years who were HPV-positive in a primary cervical cancer screening campaign, and Attendees of the Dschang District Hospital, Cameroon	κ value for agreement between Self-HPV and Dr-HPV at 6 and 12 months was 0.62 and 0.52, respectively	Sensitivity of Self-HPV for LSIL+ at 6 months: 84.6% (p=1.000), Sensitivity of Dr-HPV for LSIL+ at 6 months: 92.3% (p=1.000), Specificity of Self-HPV for LSIL+ at 6 months: 68.1% (p=0.043), Specificity of Dr-HPV for LSIL+ at 6 months: 75.7% (p=0.043), Sensitivity of Self-HPV for HSIL+ at 6 months: 88.9% (p=1.000), Sensitivity of Dr-HPV for HSIL+ at 6 months: 100% (p=1.000), Specificity of Self-HP…		0.68				p = 0.0226 (Willingness to opt for self-sampling again by younger participants)
15	Asymptomatic women with a cervix aged 25-65 years, HPV vaccination status not considered for different screening procedure	Not specifically detailed in the text	The protective effect of HPV-based screening became observable 2.5 years after screening		0.76				p = 0.78 (No significant difference in adequacy of conventional sampling between women with or without conization)
16	Women aged 30–69 years, Never-screened or under-screened women in Victoria, Australia, Residing in Victoria, Australia, Not pregnant at the time of the study, Had not had a hysterectomy	Not specifically detailed in the text	Not specifically detailed in the text		0.81				p < 0.05 (Statistical significance in chi-square or Fisher exact test)
17	African-American women, Aged 25–65 years, Residing in the Mississippi Delta, No prior history of cervical cancer or hysterectomy, Not currently pregnant, Had not given birth in the prior 8 weeks, Had not been screened in the last four years	“Choice” strategy reduced lifetime risk of cervical cancer by 14.8%, “Standard-of-care” strategy reduced cancer risk by 6.4%, “Choice” strategy cost $62,720 per year of life saved (YLS)	Detailed comparative statistics and significance not provided, but "Choice" strategy found to be more effective and efficient		0.66				p < 0.0001 (Significant difference in endocervical cellularity between self-sampling and clinician samples)
18	Non-pregnant women aged between 20 and 89 years, no previous cervical therapy or hysterectomy	OR for ASC-US+: 6.5 (3.2–13.4) RR for ASC-US+: 5.4 (2.9–10.0) NNT for ASC-US+: 6.0 (4.2–10.9) NNT for HSIL: 15.5 (15.5–35.2) OR and RR were incalculable for HSIL	No significant difference between Self-HPV and Physician-HPV in all these measurements. The study didn't provide p-values.		0.68				p < 0.01 (Significant difference in adequacy of Pap smears between self-collected and clinician-collected samples)
19	Women referred to the Royal London Hospital colposcopy clinic with a positive screening result. Women under observation for prior abnormalities, provided their most recent abnormal smear test was within the last three years	High agreement in HPV positivity between WD and DF (kappa = 0.801), lower agreement between QT and HS (kappa = 0.753), and even lower between urine and the vaginal samples (kappa = 0.568-0.646)	No significant differences in hrHPV positivity rates for different devices compared to WD (P-values: Urine = 0.17, QT = 0.52, HS = 0.09)		0.82				P < 0.05 (Statistically significant)
20	Women aged 20-69 years Abnormal cervical cytology results	Not provided in the text	Statistically significant vs pHPV: P < 0.05 Statistically significant vs pHPV: P < 0.001		0.72				P < 0.05 (Statistical significance for predictors of willingness to participate in Self-HPV screening)
21	Women aged 19 to 71 years with an abnormal cervical smear in the screening program or with symptoms were invited to the Outpatient Colposcopy Clinic at regional hospitals in Kristianstad and Helsingborg	The kappa value between the vaginal self-sampling test and the clinician-taken sample was 0.82 (95% CI=0.73- 0.91; p<0.001), while that between urine and clinician-taken sample was 0.58 (95% CI=0.46-0.70; p<0.001). The vaginal self-sampling and the clinician-taken HPV tests h	P <0.05		0.5				p < 0.05 (Significant difference in self-sampling preferences)
22	Patients identified with a missed abnormality following the re-evaluation of be- nign cervical cytology were included	kappa value of 0.74 (95% CI 0.57–0.91). Agreement between the physician-collected sample and the self-collected sample was good	Not specifically detailed in the text		0.54				p=0.79 (No statistically significant difference in HPV detection between self-home and clinician samples)
23	Aged 18 years or older Not currently pregnant No known abnormal Papanicolaou test results No symptoms of cervical cancer, genital cancer, cervical surgery, or immune treatment of the cervix in the last 6 months	Kappa (κ) coefficient: 0.69 (95% confidence interval, 0.51-0.87)	No statistically significant difference in the detection of HPV DNA was found between the 2 types of sample collection (McNemar test=0.4; P=.527).		0.47				P < 0.001 (Agreement between vaginal and cervical samples)
24	Women invited for high-risk HPV (hrHPV) testing in the Dutch cervical screening program​	In hrHPV- positive women with adequate cytology, Ct values were higher for self-collection than clinician-collec- tion with a mean Ct difference of 1¢25 (95% CI 0¢98_x0001_1¢52) in women without CIN2+, 2¢73 (1¢75_x0001_3¢72) in CIN2 and 3¢59 (3¢03_x0001_4¢15) in CIN3+	Differences were assessed using chi-square testing and z-testing; statistical significance was considered when the two-sided p-value was below 0.05​		0.43				p < 0.001 (High-risk HPV detection)
25	Women aged between 35 and 65 years	The agreement between self and conventional samples regarding HPV positivity was very good, with the following kappa coefficients: Mía by Xytotest®: κ = 0.86 Viba-Brush®: κ = 0.83 Iune: κ = 0.73 Viscose Swab: κ = 0.68	A significant difference was found in endocervical cellularity between self-sampling and clinician samples. Conventional samples showed higher endocervical cell presence (p < 0.0001)​ There was a significant difference in the adequacy of Pap smears between self-collected and clinician-collected samples, with a higher rate of unsatisfactory samples in the clinician group (p < 0.01)​ Younger partic…		0.76				p = 0.727 (No significant difference in sensitivity between Evalyn®Brush and physician-collected specimens with Anyplex™)
26	Non-pregnant women Aged 25-60 years Residing in rural areas of Greece Tested high-risk HPV positive on self-collected cervicovaginal samples	not specifically mentioned	Not specifically detailed in the text		0.82				p = 0.146 (No significant difference in sensitivity between Evalyn®Brush and physician-collected specimens with Cobas® and Xpert®HPV)
27	n/a	not specifically mentioned	p values mentioned, very significant		0.77				p < 0.001 (Significant difference in sensitivity between FLOQSwabs™ and physician-collected specimens with Anyplex™)
28	used the trial database and EHR to identify, on a weekly basis, eligible subjects from the trial who (1) were randomized to the intervention arm, (2) returned the kit, and (3) tested positive for any hrHPV type	not specifically mentioned	p-Value for chi-square or Fisher exact test was <0.05		0.74				p = 0.001 (Significant difference in sensitivity between FLOQSwabs™ and physician-collected specimens with Cobas®)
29	The criterion for inclusion into the Mombasa Cohort included: 1. Women aged 18 years and above; 2. Residing in the Mombasa area; 3. Self-identifying as exchanging sex for payment in cash or in-kind at the time of enrollment and 4. Able to provide informed consent.	not specifically mentioned	p=0.02, significant		0.81				p = 0.002 (Significant difference in sensitivity between FLOQSwabs™ and physician-collected specimens with Xpert®HPV)
30	Women aged 30-60, HPV-positive	Chi-square test	p < 0.05		0.82				p=0.035 (Significantly lower HPV positivity rate in self-collected samples compared to conventional collection)
31	Women were enrolled in the IMPROVE study if they returned a signed informed consent form between April 15, 2015, and Dec 13, 2016.	not specifically mentioned	Not specifically detailed in the text		0.77				p < 0.001 (Statistically significant increase in screening participation through self-sampling)
32	participated in the PROHTECT-3B, and aged 33-63	not specifically mentioned	P<0.001		0.74				P < 0.001 (Statistical significance for agreement between sampling methods)
33	/	/	/		0.73				p < 0.05 (Statistical significance)
34	Female patients, Previously tested negative for intraepithelial lesions or malignancy/HPV-positive, Patients with atypical squamous cells of undetermined significance or worse (ASCUS+) cytology	Agreement rate between self- and physician-sampling: 88% (κ = 0.76), HPV16/18 showed higher agreement rates than other HPVs (99%, kappa 0.96 and 89%, kappa 0.77, respectively)	The concordance rate of 88% and kappa value of 0.76 indicate statistically significant agreement between the two methods.		0.72				p = 0.014 (Sensitivity of cervical SCT to self-collected vaginal SCT)
35	Women presenting for cervical cancer screening	Agreement rate: 93.8%, Kappa statistic: 0.47 (95% CI: 21.3 - 72.3%, P < 0.05)	Moderate correlation between self-sampling and provider sampling techniques (κ = 0.47, P < 0.05)		0.88				p = 0.046 (Sensitivity of cervical SCT to physician-collected vaginal SCT)
36	Women aged 18-64 years with abnormal cervical cytology results (ASCUS or worse)	Agreement rate: 91.5% for glandular representation Kappa statistic for HPV tests: 0.43 (95% CI: 0.27-0.59)	The HPV positivity rate was significantly lower in self-collected samples compared to conventional collection (p = 0.035)		0.67				p = 0.317 (No significant difference in sensitivity between PreservCyt and other methods)
37	Women aged 30–60 years, participating in the Dutch cervical cancer screening program.	Overall concordance between self-samples and physician-taken samples was 96.8%. Proportion of true positive self-samples: 92.6% (151/163; 95% CI, 87.6–95.8). Proportion of true negative self-samples: 97.2% (1833/1886; 95% CI, 96.3–97.8). McNemar test was highly significant (p < 0.000002) indicating proportions are not comparable.	The McNemar test for correlated proportions showed significant differences in the detection rates.		0.63				p = 0.157 (No significant difference in sensitivity between SurePath and other methods)
38	Women due for a routine screening Pap smear, aged 20 to 65, self-reported not a virgin, not pregnant, not vaccinated against HPV, not menstruating, had no Pap smear for at least 2 years, and had no prior hysterectomy​	The Kappa value for the HPV DNA test results between the two self-collected samples (vsc-DRY and vsc-LIQ) was 0.81 (95% CI: 0.76–0.86), indicating a high level of agreement. Between the self-collected (vsc-DRY) and clinician-collected (ccc-LIQ) samples, the Kappa value was 0.76 (95% CI: 0.71–0.82), and between the self-collected (vsc-LIQ) and clinician-collected (ccc-LIQ) samples, it was also goo…	Higher HR-HPV prevalence in self-sampling methods compared to clinician-collected samples (p < 0.0001 for vsc-LIQ and p = 0.0008 for vsc-DRY)​		0.54				p = 0.049 (Marginal significance for HPV mRNA test agreement)
39	Women referred for treatment of premalignant cervical lesions or with a diagnosis or suspicion of cervical carcinoma​	Kappa values: Evalyn®Brush: 0.68 (95% CI: 0.52–0.83) with Anyplex™, 0.64 (95% CI: 0.49–0.77) with Cobas®, and 0.66 (95% CI: 0.52–0.80) with Xpert®HPV​ FLOQSwabs™: 0.50 (95% CI: 0.33–0.64) with Anyplex™, 0.60 (95% CI: 0.44–0.73) with Cobas®, and 0.60 (95% CI: 0.45–0.73) with Xpert®HPV​	Evalyn®Brush: No significant difference in sensitivity between Evalyn®Brush and physician-collected specimens (p = 0.727 with Anyplex™, p = 0.146 with Cobas®, and p = 0.146 with Xpert®HPV)​ FLOQSwabs™: Significant difference in sensitivity between FLOQSwabs™ and physician-collected specimens (p < 0.001 with Anyplex™, p = 0.001 with Cobas®, and p = 0.002 with Xpert®HPV)​						p < 0.0001 (Statistically significant agreement between SC and CC samples)
40	Women attending routine cervical cancer screening at King Chulalongkorn Memorial Hospital between January 1, 2015, and May 31, 2015​	Kappa agreement for HPV detection between methods: 0.73​	not specified						P < 0.05 (Statistically significant findings related to predictors of willingness to participate in Self-HPV screening)
41	Not specified	Satisfaction: Higher satisfaction reported for self-sampling and urine sampling compared to the Pap test (Odds Ratio [OR] for self-sampling = 2.01, 95% CI = 1.48–3.00; OR for urine sampling = 2.47, 95% CI = 1.75–3.48)​(48. jgo-30-e76)​. Psychological distress was significantly lower in the self-sampling and urine sampling groups compared to the Pap test group​	All p-values < 0.05 were considered statistically significant. Differences in satisfaction and distress were statistically significant among the three modalities​
42	Women with abnormal cervical cytology and/or positive high-risk HPV who attended colposcopy clinics in Bangkok, Thailand.	Concordance rate: 86.8% Kappa: 0.670 (95% CI: 0.599-0.746)	P value < 0.001 for high-risk HPV detection
43	Women referred for colposcopy to the Hospital Clínic, Barcelona, Spain, because of abnormal cervical cytology	Kappa values: for SPF10: 0.81 (CTS), 0.82 (SS), 0.77 (U1), 0.74 (U2) for GP5+/6+: 0.81 (CTS), 0.82 (SS), 0.77 (U1), 0.74 (U2)	P-values for kappa agreements: 0.125 (CTS), 0.016 (SS), 0.039 (U1), 0.002 (U2)
44	Women aged 30-49 years Not pregnant Able to provide informed consent No history of cryotherapy, loop electrosurgical excision procedure, or hysterectomy	38.8% preferred self-collection, 31.9% preferred provider collection, 29.3% had no preference	Self-collection preference was associated with prior tubal ligation, HPV knowledge, future self-sampling preference, and future home-screening preference (P b 0.05)
45	Women aged 25-69 years Never participated in a cervical cancer screening program or not had a screening test in the previous 3 years	Odds ratio for willingness to use Self-HPV due to lack of time: OR = 6.16, 95% CI = 1.61–23.60, p = 0.008 Odds ratio for satisfaction with self-sampling kit: OR = 22.59, 95% CI = 1.74–293.30, p = 0.017 Odds ratio for self-sampling kit's adequacy: OR = 12.15, 95% CI = 1.28–114.98, p = 0.029 Women who experienced pain during self-sampling had higher odds of having had a previous negative experience…	The study found statistically significant associations for predictors of willingness to participate in a Self-HPV screening program and the risk of experiencing pain during self-sampling. Significant predictors include lack of time for attending traditional screenings, satisfaction with the self-sampling kit, adequacy of the kit, and previous negative experiences with screening.
46	Women referred to a colposcopy clinic due to previous abnormal cytology or positive HPV results	Agreement between cervical SCT and PreservCyt: 91.1% (κ = 0.82) Agreement between cervical SCT and SurePath: 86.7% (κ = 0.72) Agreement between self-collected vaginal SCT and physician-collected SCT: 84.7% (κ = 0.68) Agreement between self-collected vaginal SCT and cervical SCT: 82.0% (κ = 0.63)	Sensitivity of cervical SCT to self-collected vaginal SCT (P = 0.014) and to physician-collected vaginal SCT (P = 0.046), to PreservCyt (P = 0.317), and to SurePath (P = 0.157).
47	Women living with HIV (WLHIV) aged 30 years or older undergoing a Pap test with HPV DNA testing as part of routine care	Sensitivity of self-collected HPV test: 84.6% (95% CI 65.1–95.6%) Specificity of self-collected HPV test: 62.9% (95% CI 44.9–78.5%) Kappa statistic (agreement between self-collected and clinician-collected tests): 0.5 (95% CI 0.2–0.7)	The agreement between the two HPV mRNA tests was moderate, with a p-value of 0.049 indicating marginal significance.
48	Women aged 30-64 years, overdue for cervical cancer screening (no Pap test in the past 4 years), low-income (household income below 250% of the poverty level), uninsured, underinsured, or with Medicaid insurance	Kappa agreement between self-home and clinician samples for high-risk HPV: 0.66	Statistical significance: No significant difference in HPV detection between self-home and clinician samples (p=0.79)
49	HIV-infected women, 25 years or older, without a cervical cytology test result documented in their chart within the past three years.	Sensitivity of tampon-based self-sampling: 77.4% (95% CI: 69.8%–85.0%) Specificity of tampon-based self-sampling: 77.7% (95% CI: 71.9%–83.6%) Kappa agreement: 0.54 (95% CI: 0.44–0.63)	-
50	Women visiting gynecological outpatient clinics, hrHPV-positive on cervicovaginal lavage, no history of treatment for cervical dysplasia or cancer, not currently pregnant or lactating​	--	--
51	Women aged 30-64 years, residents of Region Skåne, Sweden, and scheduled for routine cervical cancer screening.	Prevalence of severe dysplasia (HSIL or AIS) was 0.48% in the self-sampling group and 0.47% in the midwife-collected group, showing no significant difference between the two methods. The study indicates non-inferiority of self-sampling compared to midwife-collected samples in detecting severe dysplasia.	No statistically significant difference was found between the self-sampling and midwife-collected groups in detecting severe dysplasia.
52	Women aged 30-49 years, no previous hysterectomy, no current pregnancy, and no clinical test results relating to cervical cancer registered within 1 year before the date of invitation.	Cumulative prevalence of CIN2+ per 1000 years screened was about six times higher in the HPV arm (160.8) compared to the control arm (25.4), a statistically significant difference.	The difference in cumulative prevalence of CIN2+ between the self-sampling and control arms was statistically significant.
53	Women between 30 and 58 years old who did not participate in the cervical cancer screening program for ≥3 years were eligible	The risk ratio and risk difference were 1.32 (95% CI: 0.36, 4.93) and 0.2(95% CI: 0.6, 0.9), respectively.
54	Not specified	not specifically mentioned	not specifically mentioned
55	Women aged 25-65 years Had engaged in vaginal intercourse at least once during their lifetime	Concordance rate between vaginal and cervical samples: 91.4% Kappa statistic (κ): 0.73, indicating good agreement between the two sampling methods	P < 0.001 for agreement between vaginal and cervical samples
56	Women aged 25-69 years who had not undergone cervical cancer screening in the last 3 years	--	--
57	Women with histologically confirmed HPV 16/18 positive cervical cancer.	Sensitivity for detecting HPV 16/18 positive cervical cancer was 95% for both self-collected lavage samples and clinician-collected cytobrush samples. The swab method yielded 100% sensitivity.	--
58	Age 21 years or older No history of hysterectomy English speaking Biological female Due for a Pap test or HPV test Residing in Louisiana Ability to use a tampon	Not explicitly provided; equivalence and reliability were tested using McNemar χ2 test and Cohen κ.	The swab self-collection method was found to be statistically noninferior to the clinical method, with a high agreement rate (Cohen κ = 0.772).
59	Women attending the Cape Coast Teaching Hospital’s HIV and outpatient clinics, aged ≥18 years.	Overall concordance between SC and CC samples was 94.2%, with a kappa value of 0.88 (p < 0.0001), indicating excellent agreement. Sensitivity of SC samples was 92.6% compared to CC samples.	The kappa value of 0.88 (p < 0.0001) indicates statistically significant concordance between SC and CC samples.
60	Women aged 30-65 years who had not undergone cervical cancer screening within the last 3 years.	not mentioned	The increase in screening participation through self-sampling was statistically significant (P < 0.001).
61	Postmenopausal women aged 55-60 years attending cervical cancer screening	The study found 83% concordance between self-sampling and professional sampling, with self-sampling showing a trend toward detecting more HPV genotypes, though not statistically significant.	No significant differences were noted in genotype detection, though self-sampling detected more HPV genotypes in some cases.
62	Premenopausal women aged 30-50 years who had not undergone a cervical smear in the previous 3 years	Not applicable, as the study was descriptive in nature	not applicable
63	not explicitly mentioned	not mentioned	P < 0.001
64	Women from the general population seeking primary screening Women referred for colposcopy due to abnormal screening test results	Good agreement between self- and clinician-collected samples with Cohen κ = 0.72 (95% CI: 0.669–0.771).	Agreement between sampling methods is statistically significant, with high kappa values indicating good reliability.
65	samples were collected from women aged ≥50 years attending for a colposcopy (following a speculum HPV-positive screening result) or women aged ≥35 years (with confirmed cervical intraepithelial neoplasia (CIN) 2+), and women aged 50 64 years attending routine screening.	not mentioned	P < 0.001
66	/	not mentioned	P < 0.001

## Sheet: NPV
Study IDs	data extraction	Self Sampling NPV %	Pap smear NPV %			Table for graph:	Self Sampling NPV %	Pap smear NPV %		Self Sampling NPV %	Pap smear NPV %			Self Sampling NPV %	Pap smear NPV %	x axis	y axis (SS)	area				x axis	y axis (PS)	area
1	Not mentioned	Not mentioned	Not mentioned				0.9908	99.17		99.08	99.17			0.9908	0.9917	1	99.08	81.69				1	99.17	82.935
2	Not mentioned	Not mentioned	Not mentioned				0.643	66.7		64.3	66.7			0.643	0.667	2	64.3	73.8				2	66.7	83.35
3	Not mentioned	Not mentioned	Not mentioned				0.833	100		83.3	100			0.833	1	3	83.3	91.15				3	100	100
4	Not mentioned	Not mentioned	Not mentioned				0.99	100		99	100			0.99	1	4	99	91.5				4	100	100
5	not mentioned	Not mentioned	Not mentioned				0.84	100		84	100			0.84	1	5	84	81.5				5	100	89.5
6	self sampling vs pap smear Calculations based off of hrHPV values from Table 4: PPV: 94.1%, NPV: 98.7%	99.08	99.17				0.79	79		79	79			0.79	0.79	6	79	86.7				6	79	89.5
7	Higher PPV	not mentioned	not mentioned				0.944	100		94.4	100			0.944	1	7	94.4	79.75				7	100	80.4
8	The positive predictive values (HP, 76.5%; SC, 80.0%), the negative predictive values (HP, 66.7%; SC, 64.3%)	64.3	66.7				0.925	Not mentioned		65.1	60.8			0.651	0.608	8	65.1	82.55				8	60.8	80.4
9	The PPV and NPV of various screening tests individually were: HPV 18%, 91.7%, Pap smear 39.8%, 97.1% respetively	91.7 (87.9 to 94.6)	97.1 (94.8 to 98.5)				0.651	60.8		100	100			1	1	9	100	93.4				9	100	96.55
10	Not specifically mentioned	Not mentioned	Not mentioned				1	100		86.8	93.1			0.868	0.931	10	86.8	89.35				10	93.1	92.4
11	Not specifically mentioned	Not mentioned	Not mentioned				0.868	93.1		91.9	91.7			0.919	0.917	11	91.9	95.35				11	91.7	95.05
12	Not provided in the text	Not mentioned	Not mentioned				0.919	91.7		98.8	98.4			0.988	0.984	12	98.8	78.95				12	98.4	83.4
13	Vaginal self-samples: NPV 83.3%, Clinician-taken cervical HPV samples: NPV 100%, Routine cytology: NPV 93.3%	83.3	100				0.988	98.4		59.1	68.4			0.591	0.684	13	59.1					13	68.4
14	Not detailed in the text	Not mentioned	Not mentioned				0.846	Not mentioned					mean:	0.849831	0.890208		Total area under graph:	1025.69					Total area under graph:	1073.48
15	At 6 months: Self-HPV PPV for HSIL+: 14.3%, NPV: 99.0%, At 6 months: Dr-HPV PPV for HSIL+: 19.6%, NPV: 100%, At 12 months: Self-HPV PPV for HSIL+: 10.4%, NPV: 98.8%, At 12 months: Dr-HPV PPV for HSIL+: 16.1%, NPV: 99.0%	99	100				0.591	68.4
16	Not detailed in the text	Not mentioned	Not mentioned			Mean:	0.854587	84.9831
17	Not specifically detailed in the text	Not mentioned	Not mentioned
18	Not specifically detailed in the text	Not mentioned	Not mentioned			15/67 mentioned npv for self sampling, whilst only 13/67 mentioned compared npv of both self sampling and pap smear (2 of the 15 articles didnt mention pap smear npv)
19	Overall PPV for ASC-US+: 19.6 Overall PPV for HSIL: 6.5 PPV for women aged 30–49 years for ASC-US+: 23.5 PPV for women aged 30–49 years for HSIL: 27.8 NPV was not mentioned	Not mentioned	Not mentioned									~~~						hala
20	Not mentioned	Not mentioned	Not mentioned
21	PPV for sHPV for ≧CIN2 = 34.5 (22.0–47.1) PPV for sHPV for CIN3 = 10.9 (2.7–19.1) PPV for pHPV for ≧CIN2 = 38.6 (28.1–49.0) PPV for pHPV for CIN3 = 10.8 (4.2–17.5) NPV for sHPV for ≧CIN2 = 84.0 (76.0–91.9) NPV for sHPV for CIN3 = 96.3 (92.2–100.0) NPV for pHPV for ≧CIN2 = 100 NPV for pHPV for CIN3 = 100	84	100
22	NPV for HSIL/AIS in vaginal self-sampling: 79% NPV for HSIL/AIS in urine sampling: 57.4% NPV for HSIL/AIS in cytology: Not explicitly stated​ PPV not mentioned	79	79
23	Self-Collected Sampling PPV: 40.7% (95% CI 23.9–59.4) Self-Collected Sampling NPV: 94.4% (95% CI 83.4–98.8) Physician-Collected Sampling PPV: 48.1% (95% CI 30.3–66.4) Physician-Collected Sampling NPV: 100% (95% CI 93.3–100	94.4	100
24	PPV of self-sampling: 24.0% NPV of self-sampling: 92.5%	92.5	Not mentioned
25	Not mentioned	Not mentioned	Not mentioned
26	Not provided	Not mentioned	Not mentioned
27	PPV: 27.46% NPV: not provided​	Not mentioned	Not mentioned
28	Not mentioned	Not mentioned	Not mentioned
29	not mentioned	Not mentioned	Not mentioned
30	The positive predictive value was 16% for sc-WET and 17% for sc-DRY. The positive predictive value for physician-collection specimens was 19%.	Not mentioned	Not mentioned
31	The positive predictive value for detection of ≥CIN2 was higher with cytology on self‐collected samples than on physician‐collected samples. PPV for Self sampling was 64.6% and NPV was 65.1%	65.1	60.8
32	not mentioned	Not mentioned	Not mentioned
33	although referral was higher in the methylation triage group given the positive predictive value of this test being lower compared with cytology	Not mentioned	Not mentioned
34	/	Not mentioned	Not mentioned
35	PPV: 26.5% for self-sampling, 26.0% for physician-sampling, NPV: 100% for both methods	100	100
36	PPV and NPV not explicitly provided.	Not mentioned	Not mentioned
37	PPV (Self-sampling): 27.8% NPV (Self-sampling): 86.8% PPV (Pap smear): 44.9% NPV (Pap smear): 93.1%	86.8	93.1
38	Not provided directly in the article.	Not mentioned	Not mentioned
39	Not mentioned	Not mentioned	Not mentioned
40	not mentioned	Not mentioned	Not mentioned
41	not mentioend	Not mentioned	Not mentioned
42	not mentioned	Not mentioned	Not mentioned
43	NPV of self-sampling: 91.9% (95% CI: 85.6%-96.0%) NPV of Pap smear: 91.7% (95% CI: 86.0%-95.7%)	91.9	91.7
44	not mentioend	Not mentioned	Not mentioned
45	not mentioned	Not mentioned	Not mentioned
46	not mentioned	Not mentioned	Not mentioned
47	Cervical Samples: PreservCyt PPV: 13.3% (95% CI: 9.4–18.6) NPV: 99.7% (95% CI: 98.4–100) Cervical SCT: PPV: 12.1% (95% CI: 8.6–16.7) NPV: 100% (95% CI: 98.8–100) SurePath: PPV: 14.9% (95% CI: 10.5–20.7) NPV: 99.5% (95% CI: 98.2–99.9) Vaginal Samples: SCT (self-collected): PPV: 10.7% (95% CI: 7.4–15.3) NPV: 98.8% (95% CI: 96.9–99.5) SCT (physician-collected): PPV: 12.2% (95% CI: 8.3–17.5) NPV: 98.…	98.8	98.4
48	PPV: 62.9% NPV: 84.6%	84.6	Not mentioned
49	PPV: Not explicitly provided NPV: High due to the high sensitivity for CIN2+	Not mentioned	Not mentioned
50	PPV: Not explicitly provided NPV: Not explicitly provided	Not mentioned	Not mentioned
51	--	Not mentioned	Not mentioned
52	PPV for detecting severe dysplasia in the self-sampling group was 22.2%, while in the midwife-collected group it was 15.6%. NPV was not explicitly provided.	Not mentioned	Not mentioned
53	Not explicitly provided.	Not mentioned	Not mentioned
54	PPVs in the intervention group was 38.5% and in the control group was 28.6%.	Not mentioned	Not mentioned
55	not explictly provided	Not mentioned	Not mentioned
56	PPV for detecting ≥CIN-II: 8.8% for vaginal swabs vs. 10.6% for cervical swabs	Not mentioned	Not mentioned
57	not mentioned	Not mentioned	Not mentioned
58	not mentioned	Not mentioned	Not mentioned
59	Not explicitly reported.	Not mentioned	Not mentioned
60	not directly reported.	Not mentioned	Not mentioned
61	not mentioned	Not mentioned	Not mentioned
62	not mentioned	Not mentioned	Not mentioned
63	not mentioned	Not mentioned	Not mentioned
64	The physician collected cervical samples had a a PPV of 100%, and an NPV of 68.4%. a PPV of 100%, and an NPV of 59.1%.	59.1	68.4
65	not mentioned	Not mentioned	Not mentioned
66	not mentioned	Not mentioned	Not mentioned
67	not mentioned	Not mentioned	Not mentioned

## Sheet: Study purpose
Study ID	Title	Detection rate	Sensitivity and specificity	PPV and NPV	Patient satisfaction and acceptability	Cost effectiveness
1	Accuracy and effectiveness of HPV mRNA testing in cervical cancer screening: a systematic review and meta-analysis	In some of the included studies: "APTIMA was similarly sensitive (relative sensitivity 0·98 [95% CI 0·95-1·01]) and slightly more specific (1·03 [1·02-1·04]) for CIN2+. The relative sensitivity for CIN3+ was 0·98 (95% CI 0·95-1·01)." . In other included studies: "In self-collected samples, APTIMA was less sensitive for CIN2+ (relative cross-sectional sensitivity 0·84 [0·74-0·96]) but similarly sp…	Some of the included studies illustrated that self sampling was similar in sensitivity and slighlt more sensitive. Other studies illustrated that self sampling was less sensitive and similar in specificity	Not mentioned	Not mentioned	Not mentioned
2	Detecting cervical precancer and reaching underscreened women by using HPV testing on self samples: updated meta-analyses.	not mentioned	Figure 1 shows that in screening studies, the pooled sensitivity of hrHPV assays for CIN2+ was substantially lower in self samples (77%) than in clinician samples (93%). The pooled specificity to exclude CIN2+ was 84% in self samples and 86% in clinician samples.	table 1 for ppv but npv not mentioned	"Table 4 and supplementary figure 12 show that, on average, 0.7% of self samples were unsatisfactory for hrHPV testing." The following is about the participation rate which in a sense is sort of acceptability: "Table 3 and supplementary figure 11 show that, on average, the relative participation rate was 1.87 times and 2.33 times higher in the self sampling arm versus the control arm of the trial…	Not mentioned
3	Performance of BD Onclarity HPV assay on FLOQSwabs vaginal self-samples.	not mentioned	No significant difference was observed in the relative sensitivity and specificity between vaginal samples tested with the two platforms. "First vaginal self sample sensitivity: 89.2%. Second vaginal self sample sensitivity: 90.2%. Moreover, clinical sensitivity for CIN2 on self-collected samples using BD Viper LT or BD COR compared to paired LBC sample was 1.01, 1.01, and 1.00, respectively."	Not mentioned	Not mentioned	not mentioned
4	HPV Self-sampling in Indigenous Communities: A Scoping Review.	not mentioned	Higher sensitivity in self sampling	not mentioned	women identifed HPV self-sampling to be easy, convenient or comfortable. Closely related to this notion of ease and comfort, many resources reported that HPV self-sampling was seen as less embarrassing or painful than a Pap test	Not mentioned
5	Accuracy of Human Papillomavirus (HPV) Testing on Urine and Vaginal Self-Samples Compared to Clinician-Collected Cervical Sample in Women Referred to Colposcopy.	95.5% hrHPV positive	Cervical and vaginal specimens were equally sensitive for CIN2+ detection (95.5%), vaginal samples were slightly inferior in terms of specificity	self sampling vs pap smear Calculations based off of hrHPV values from Table 4: PPV: 94.1%, NPV: 98.7%	Not mentioned	Not mentioned
6	HPV-based Cervical Cancer Screening on Self-samples in the Netherlands: Challenges to Reach Women and Test Performance Questions.	HPV positivity and detection rate of precancer (CIN3+) were lower in the self-sampling compared with the clinician-sampling group (adjusted ORs of 0.65 and 0.86, respectively)	Self sampling lower sensitivity and higher specificty compared to clinician samples	Higher PPV	"The following population categories were more likely to self-sample than undergo clinician sampling: never screened women (29.0% vs. 11.9%, in the self-sampling and clinician-sampling groups, respectively, ratio = 2.43); the youngest ages 30–39 years (ratio = 1.29) and oldest group ages 60 years versus the middle age groups (ratio = 1.06); unemployed and supported by social welfare versus employ…	Not mentioned
7	A positive HPV test with positive p16/Ki-67 double staining in self-sampled vaginal material is an accurate tool to detect women at risk for cervical cancer.	Doesn't mention explicitly mention Detection rate	Self sampling Sensitivity: 94.1%, Specificity: 31.0%. Pap smear: Sensitivity: 93.75%, Specifity 31.1%	The positive predictive values (HP, 76.5%; SC, 80.0%), the negative predictive values (HP, 66.7%; SC, 64.3%)	not mentioned	not mentioned
8	Performance of HPV testing, Pap smear and VIA in women attending cervical cancer screening in Kilimanjaro region, Northern Tanzania: a cross-sectional study nested in a cohort.	Doesn't mention explicitly mention Detection rate	Self sampling Sensitivity: 62.5%, Specificity: 59.3%. Pap smear: Sensitivity: 82.8%, Specifity 82.1%. When combined, the sensitivity and specificity for HPV and Pap smear were 90.6%, 70.6%	The PPV and NPV of various screening tests individually were: HPV 18%, 91.7%, Pap smear 39.8%, 97.1% respetively	not menioned	not mentioned
9	Cost-effectiveness of the screen-and-treat strategies using HPV test linked to thermal ablation for cervical cancer prevention in China: a modeling study.	Not specified in discrete percentages in the study. However, it was implied through the cost-effectiveness and QALYs gained. Self-sampling strategies, particularly without triage, were highlighted as yielding the most cost savings and the highest incremental QALYs (420 QALYs).	Provided in Table 2 - Too many results to include here	Not specifically mentioned	Not specifically mentioned	Self-HPV without triage was the most cost-effective strategy, yielding more QALYs and cost savings compared to current strategies
10	Human papillomavirus (HPV) detection in vaginal self-samples: evaluation of eNat® as an alternative suspension medium to ThinPrep®PreservCyt® for vaginal swabs.	Vaginal self-samples suspended in ThinPrep®PreservCyt®: 66.6% (20/30), 63.3% (19/30), and 66.6% (20/30) were hrHPV positive with Anyplex™II HPV28, Papilloplex® High Risk HPV, and HPV OncoPredict assays, respectively. Vaginal self-samples suspended in eNat®: 66.6% (20/30) were hrHPV positive with all three assays.	Substantial agreement was demonstrated between self-samples and clinician-collected samples, with Cohen's kappa values indicating high concordance.	Not specifically mentioned	Not directly assessed in the study; however, the study discusses the potential for self-sampling to improve participation in cervical cancer screening programs.	The study highlighted the potential cost-effectiveness of using eNat® due to its non-flammable nature and the ability to inactivate infectious agents, making it a suitable alternative to ThinPrep®PreservCyt® in low- and middle-income countries.
11	Cervical cancer screening using HPV tests on self-samples: attitudes and preferences of women participating in the VALHUDES study.	Not explicitly mentioned	Not relevant	Not provided in the text	95% of women found instructions for self-collection clear, found collection easy, and were confident they performed the procedure correctly. 57% preferred self-sampling for the next screening round, while 41% preferred clinician collection.	Not provided in the text
12	Self-sampling with HPV mRNA analyses from vagina and urine compared with cervical samples.	Vaginal self-samples: 85.5% sensitivity for detecting HSIL/AIS/cancer	Vaginal self-samples: 85.5% sensitivity, 48.1% specificity, Clinician-taken cervical HPV samples: 100% sensitivity, 49.0% specificity, Routine cytology: 81.7% sensitivity, 93.3% specificity	Vaginal self-samples: NPV 83.3%, Clinician-taken cervical HPV samples: NPV 100%, Routine cytology: NPV 93.3%	Not detailed in the text	Not detailed in the text
13	Preference for Human Papillomavirus Self-Collection and Papanicolaou: Survey of Underscreened Women in North Carolina.	Not directly mentioned in terms of detection rate	Not detailed in the text	Not detailed in the text	51% of women preferred HPV self-collection, 19% preferred Pap testing, and 27% had no preference. High level of acceptability for HPV self-collection. Most respondents believed that the HPV self-test and Pap test protected women’s health equally well	Not detailed in the text
14	Self- versus physician-collected samples for the follow-up of human papillomavirus-positive women in sub-Saharan Africa.	At 6 months: Sensitivity for HSIL+ detection was 88.9%, At 12 months: Sensitivity for HSIL+ detection was 83.3%	At 6 months: Self-HPV Sensitivity for HSIL+: 88.9%, Specificity: 66.9%, At 6 months: Dr-HPV Sensitivity for HSIL+: 100%, Specificity: 74.3%, At 12 months: Self-HPV Sensitivity for HSIL+: 83.3%, Specificity: 65.6%, At 12 months: Dr-HPV Sensitivity for HSIL+: 71.4%, Specificity: 79.0%	At 6 months: Self-HPV PPV for HSIL+: 14.3%, NPV: 99.0%, At 6 months: Dr-HPV PPV for HSIL+: 19.6%, NPV: 100%, At 12 months: Self-HPV PPV for HSIL+: 10.4%, NPV: 98.8%, At 12 months: Dr-HPV PPV for HSIL+: 16.1%, NPV: 99.0%	Not detailed in the text	Not detailed in the text
15	(COULD EXCLUDE THIS - RUN IT BY SUPERVISOR) Updated evidence-based recommendations for cervical cancer screening in France	Self-sampling for HPV testing is as sensitive but slightly less specific than clinician-taken samples	Self-sampling with HPV testing is as sensitive but slightly less specific than clinician-taken samples	Not detailed in the text	Self-sampling is more effective at reaching underscreened women compared to sending invitations for clinician-taken samples	Previous assessments showed cost-effectiveness of organized screening programs
16	Women's experience with home-based self-sampling for human papillomavirus testing.	Not specifically detailed in the text	Not specifically detailed in the text	Not specifically detailed in the text	94% found home-based self-sampling less embarrassing, 90% found it less uncomfortable, 98% found it more convenient compared to their last Pap test, 88% preferred to take the self-sample at home in the future	Not detailed in the text
17	Cost-Effectiveness of Offering Cervical Cancer Screening with HPV Self-Sampling among African-American Women in the Mississippi Delta.	Not specifically detailed in the text	Test sensitivity/specificity for CIN2+: Pap/HPV co-testing: 96.3%/80.6%, Test sensitivity/specificity for CIN2+: hrHPV self-collection: 95.3%/72.2%	Not specifically detailed in the text	Women in the “Choice” arm were more than five times as likely to adhere to screening compared to women in the “Standard-of-care” arm	"Choice" strategy cost $62,720 per YLS when offered every 5 years, ”Standard-of-care" strategy was not found to be efficient
18	HPV self-sampling as primary screening test in sub-Saharan Africa: implication for a triaging strategy.	0.146	Specificity for HSIL: 86.6% (86.2–86.6%) Sensitivity for HSIL: 100% (52.1–100%) Specificity for ASC-US+: 87.8% (86.9–88.9%) Sensitivity for ASC-US+: 45.0% (30.3–60.3%)	Overall PPV for ASC-US+: 19.6 Overall PPV for HSIL: 6.5 PPV for women aged 30–49 years for ASC-US+: 23.5 PPV for women aged 30–49 years for HSIL: 27.8 NPV was not mentioned	Opinions and preferences about the sampling options were collected via a questionnaire (results partly published elsewhere)	Not mentioned
19	A Randomized Comparison of Different Vaginal Self-sampling Devices and Urine for Human Papillomavirus Testing-Predictors 5.1.	DF: 71.7% WD: 71.7% QT: 69.3% HS: 65.1% Urine: 76.0%	Sensitivity for CIN3+: WD: 91.2% DF: 88.2% QT: 81.8% HS: 77.4% Urine: 89.7% Specificity for <CIN2: WD: 34.2% DF: 33.8% QT: 34.3% HS: 39.5% Urine: 27.4%	Not mentioned	Clear preference for DF over WD (71.4%, P=0.003), but no clear preference between QT and HS (53.4% preferred HS, P=0.48). HS device emerged as the device least easy to use with 12.6% indicating it was quite difficult or very difficult Urine sample well-received	Not explicitly provided, but the study notes the importance of cost and simplicity, particularly in low and middle-income countries
20	Accuracy of self-collected human papillomavirus samples from Japanese women with abnormal cervical cytology.	40.4% (55/136)	Sensitivity for detecting ≧CIN2: 59.4% (sHPV) vs. 100% (pHPV) Sensitivity for detecting CIN3: 66.7% (sHPV) vs. 100% (pHPV) Specificity for detecting ≧CIN2: 65.4% (sHPV) vs. 51% (pHPV) Specificity for detecting CIN3: 61.4% (sHPV) vs. 41.7 (pHPV)	PPV for sHPV for ≧CIN2 = 34.5 (22.0–47.1) PPV for sHPV for CIN3 = 10.9 (2.7–19.1) PPV for pHPV for ≧CIN2 = 38.6 (28.1–49.0) PPV for pHPV for CIN3 = 10.8 (4.2–17.5) NPV for sHPV for ≧CIN2 = 84.0 (76.0–91.9) NPV for sHPV for CIN3 = 96.3 (92.2–100.0) NPV for pHPV for ≧CIN2 = 100 NPV for pHPV for CIN3 = 100	Self-collected HPV (sHPV) testing was favorably accepted by the participants, with less embarrassment and pain reported compared to physician-collected HPV (pHPV) testing. Specifically: 68.3% of participants reported no embarrassment with sHPV testing compared to 12.5% with pHPV testing. 59.5% reported no pain with sHPV testing compared to 11.0% with pHPV testing.	Not mentioned directly
21	Vaginal and Urine Self-sampling Compared to Cervical Sampling for HPV-testing with the Cobas 4800 HPV Test.	Vaginal self-sampling: 96.4% sensitivity Urine self-sampling: 83.9% sensitivity​	The vaginal self-sampling and the clinician-taken HPV tests had the same sensitivity of 92.8% (95% confidence interval=86.3- 96.8%) and specificity for detection of high-grade squamous intraepithelial lesion (HSIL) and adenocarcinoma in situ (AIS). Detection in urine samples had a sensitivity of 76.3% (95%	NPV for HSIL/AIS in vaginal self-sampling: 79% NPV for HSIL/AIS in urine sampling: 57.4% NPV for HSIL/AIS in cytology: Not explicitly stated​ PPV not mentioned	None of the women in this study reported that vaginal self-sampling was uncomfortable. The swab sample kit was easy to use and the women did not report any difficulties or problems with the written and figure instructions, probably due to a widespread use of tampons for menstrual bleeding.	Clinician-taken cervical HPV sample: at least €40 plus the cost of HPV analysis Self-sampling vaginal devices, logistics, and transport: less than 1/10th of the clinician-taken sample​
22	High-Risk Types of Human Papilloma Virus DNA Testing in Women with False Negative Cytology.	Detection Rate of HPV in Self-Sampling Group: 84.6% sensitivity for CIN2+ (95% CI 59.1–96.7)	Self-Sampling Sensitivity: 84.6% (95% CI 59.1–96.7) Self-Sampling Specificity: 68% (95% CI 54.3–79.6) Pap Smear Sensitivity: 100% (95% CI 82.7–100) Pap Smear Specificity: 72% (95% CI 58.6–83.0)	Self-Collected Sampling PPV: 40.7% (95% CI 23.9–59.4) Self-Collected Sampling NPV: 94.4% (95% CI 83.4–98.8) Physician-Collected Sampling PPV: 48.1% (95% CI 30.3–66.4) Physician-Collected Sampling NPV: 100% (95% CI 93.3–100	Not specifically mentioned	Not specifically mentioned
23	Can Human Papillomavirus DNA Self-sampling be an Acceptable and Reliable Option for Cervical Cancer Screening in Female Sex Workers?	Detection rate of HPV in self-sampling group: 39.7% (27/68)	Sensitivity of self-smapling: 66.7% Specificity of self-sampling: 66.1%	PPV of self-sampling: 24.0% NPV of self-sampling: 92.5%	65.6% preferred HPV DNA self-sampling 34.4% preferred clinician sampling Higher preference for self-sampling among those without previous Pap test experience (86.7%)	The NPV indicated that HPV DNA self-sampling could potentially be incorporated into conventional screening to lengthen the interval between cervical screening and thus make it more cost- effective
24	Clinical performance of high-risk HPV testing on self-samples versus clinician samples in routine primary HPV screening in the Netherlands: An observational study.	7.4% positive hrHPV test result​	Relative sensitivity was 0.88 (95% CI 0.72–1.08) self-sampling and 0.94 (0.90–0.97) for clinician-collected samples Self-sampling showed a 6% lower sensitivity but 2% higher specificity compared to clinician-based hrHPV testing​	Not mentioned	not mentioned	not mentioned
25	Validity and acceptance of self vs conventional sampling for the analysis of human papillomavirus and Pap smear.	HPV Test Results by Device: Viscose Swab: Negative: 62.3% Positive for type 16 ± other types: 9.8% Positive for type 18 ± other types: 4.9% Positive for only other types: 23.0% Iune Device: Negative: 57.4% Positive for type 16 ± other types: 11.5% Positive for type 18 ± other types: 4.9% Positive for only other types: 26.2% Mía by Xytotest®: Negative: 57.6% Positive for type 16 ± other types: 13.…	Mía by Xytotest®: Sensitivity of 95.7%, Specificity of 91.7% Viba-Brush®: Sensitivity of 95.7%, Specificity of 88.9% Iune: Sensitivity of 90.9%, Specificity of 84.6% Viscose Swab: Sensitivity of 81.8%, Specificity of 87.2% Cytological Results for Self-Sampling Viba-Brush®: Sensitivity (95% CI): 65.0% (40.8%-84.6%) Specificity (95% CI): 84.6% (65.1%-95.6%) Kappa Coefficient (95% CI): 0.51 (0.25–0.…	Not provided	110 out of 120 participants (91.7%) viewed self-sampling as advantageous. 66 participants (60.0%) appreciated the ability to choose the time and place for sampling. 66 participants (60.0%) valued the comfort and ease of scheduling 42 participants (38.2%) preferred the privacy of self-sampling to avoid exposing genitals to healthcare staff. 24 participants (21.8%) cited reduced fear of pain or dis…	not mentioned
26	Comparison of different strategies for the triage to colposcopy of women tested high-risk HPV positive on self-collected cervicovaginal samples.	not specifically mentioned	Self-sampling with HPV16/18 genotyping showed a sensitivity of 96.36%​	PPV: 27.46% NPV: not provided​	self-sampling were noted to be high, as self-sampling increased participation among under-screened populations. This method allowed women to collect samples in a less invasive and more comfortable setting, leading to improved screening uptake​	not mentioned
27	HPV self-sampling in Japanese women: A feasibility study in a population with limited experience of tampon use.	0.86	similar sensitivity (mentioned in intro when referring to a conclusion from a meta analysis)	Not mentioned	Ninety per cent of participants stated they would use self-sampling again. They found instructions easy to follow and reported no issues with the usability of the self-sampling device. Compared with physician-led testing, women found self-sampling significantly less painful, less embarrassing and could relax more (p < 0.001), regardless of history of tampon use, which was associated with negative…	not mentioned
28	Understanding Patients' Perspectives and Information Needs Following a Positive Home Human Papillomavirus Self-Sampling Kit Result.	not mentioned	not mentioned	not mentioned	Theme 1: Convenience of HPV kit Women liked the convenience of a mailed hrHPV kit. Theme 2: Intense affect after receiving positive kit results Most participants reported experiencing intense affect (feelings and emotions) after receiving positive kit results. Theme 3: Information seeking from various sources Shock and fear about the kit findings triggered many questions. Theme 4: Importance of f…	High deductible plan is defined as meeting one of these three criteria: (1) individual annual deductible ≥$1350; (2) family annual deductible ≥$2700; (3) specialty visit copayment >$30.
29	High-risk Human Papillomavirus Messenger RNA Testing in Wet and Dry Self-collected Specimens for High-grade Cervical Lesion Detection in Mombasa, Kenya.	Concordance of hr-HPV mRNA detection between self-collected stored wet (sc-WET) and dry (sc-DRY) Overall, approximately one-third of women tested positive for hr-HPV mRNA using the self-collected sampling stored wet (n=147, 37%) or stored dry (n=127; 32%). A quarter of women (97/387) were positive for hr-HPV mRNA with both sc-WET and sc-DRY samples; 12% (47/387) were hr-HPV mRNA positive using th…	look at table 3. Performance of hr-HPV mRNA testing of self-collected stored wet, self-collected stored dry, and physician-collected specimens, and visual inspection with acetic acid for the detection of ≥HSIL The overall sensitivity estimates of hr-HPV mRNA for ≥HSIL of sc-WET [85%] and sc-DRY [78%] were comparable (Difference: −0.07). Physician-collected samples for hr-HPV mRNA testing showed a…	The positive predictive value was 16% for sc-WET and 17% for sc-DRY. The positive predictive value for physician-collection specimens was 19%.	36% of women reported preferring self-collection compared to physician-collection. ADDITIONAL INFO: Women more frequently reported to prefer self-collection stored dry (46%) compared to storage in media (31%). Most women agreed that the Evalyn brush (used for dry storage) was comfortable to insert (88%) and came with instructions easy to understand (95%). About half of participants were concerned…	not mentioned
30	Reflex cytology for triage of high-risk human papillomavirus positive self-sampled material in cervical cancer screening: a prospective cohort study.	0.294	Reflex cytology on self‐samples for detecting abnormal cytology showed a sensitivity of 26.4% and specificity of 90.5%	The positive predictive value for detection of ≥CIN2 was higher with cytology on self‐collected samples than on physician‐collected samples. PPV for Self sampling was 64.6% and NPV was 65.1%	not explicitly mentioned	not explicitly mentioned
31	Performance of human papillomavirus testing on self-collected versus clinician-collected samples for the detection of cervical intraepithelial neoplasia of grade 2 or worse: a randomised, paired screen-positive, non-inferiority trial.	CIN2: 96%	The CIN2+ sensitivity and specificity of HPV testing did not differ between self-sampling and clinicianbased sampling (relative sensitivity 0·96 [0·90–1·03]; relative specificity 1·00 [0·99–1·01]). For the CIN3+ endpoint, relative sensitivity was 0·99 (0·91–1·08) and relative specificity was 1·00 (0·99–1·01).	not mentioned	not mentioned	not mentioned
32	DNA methylation analysis in self-sampled brush material as a triage test in hrHPV-positive women.	n/a	DNA methylation analysis of JAM3 showed the highest combined specificity (88%) and sensitivity (82%) for detection of CIN3+, whereas cytology showed a specificity of 48% and a sensitivity of 91%.	although referral was higher in the methylation triage group given the positive predictive value of this test being lower compared with cytology	not mentioned	not explicitly mentioned
33	Self-Collected Samples in Cervical Cancer Screening: Results of HPV and Pap Self-Collected Samples Compared to Physician-Obtained Specimens.	Differences between test positivity (HPV-hr) and test negativity were higher in the self-test group (Fig. 1, 2). In clinician-taken test samples, there was a complete concordance of the 4 HPV-hr test results in 83 of 106 patients (78%). In the self-test samples, a concordance of the 4 test results was only found in 72 patients (68%).	Cervista self-test sensitivity: 76%, clinician test: 92%; Aptima self-test sensitivity: 82%, clinician test: 96%).	/	.	/
34	Evaluation of the concordance in HPV type between self- and physician-collected samples using a brush-based device and a PCR-based HPV DNA test in Japanese referred patients with abnormal cytology or HPV infection.	0.5	Both methods showed 100% sensitivity to CIN2+. Specificity: 57.0% for physician-sampling and 58.1% for self-sampling	PPV: 26.5% for self-sampling, 26.0% for physician-sampling, NPV: 100% for both methods	The article mentions that self-sampling is less awkward and acceptable for screening patients but does not provide specific data on satisfaction.	does not provide specific information on cost effectiveness.
35	Comparison between self sampling and provider collected samples for Human Papillomavirus (HPV) Deoxyribonucleic acid (DNA) testing in a Nigerian facility.	9.8% (19 out of 194)	Sensitivity and specificity not explicitly provided but moderate correlation was observed.	PPV and NPV not explicitly provided.	Not explicitly provided, but self-sampling mentioned as a feasible alternative that may improve screening attendance.	Not provided
36	The Role of Self-Collection by Vaginal Lavage for the Detection of HPV and High-Grade Intraepithelial Neoplasia.	0.291	Sensitivity (Self-sampling): 50.0% (for HPV) Specificity (Self-sampling): 71.7% Sensitivity (Pap smear): 81.5% (for HPV) Specificity (Pap smear): 71.3%	PPV (Self-sampling): 27.8% NPV (Self-sampling): 86.8% PPV (Pap smear): 44.9% NPV (Pap smear): 93.1%	58.8% of participants preferred self-collection Majority found the method easy to perform and not embarrassing	Not provided
37	High-risk human papillomavirus detection in self-sampling compared to physician-taken smear in a responder population of the Dutch cervical screening: Results of the VERA study.	10.0% (204/2049; 95% CI, 8.7–11.3)	Not explicitly stated, but concordance was 96.8%, with true positive and true negative rates as mentioned above.	Not provided directly in the article.	97.1% of women rated self-sampling as convenient, and 98.5% rated it as user-friendly. 62.8% preferred self-sampling over physician-taken sampling for the next screening round.	Not discussed in the article.
38	Accuracy of dry vaginal self-sampling for detecting high-risk human papillomavirus infection in cervical cancer screening: a cross-sectional study.	vsc-DRY: 24.5% (177/722) vsc-LIQ: 25.5% (184/722)​	vsc-DRY: Sensitivity 88.7%, Specificity 92.5% vsc-LIQ: Sensitivity 87.4%, Specificity 90.9%​	Not mentioned	A total of 104 women (14.4%) reported difficulties, and 64 women (8.9%) reported pain or discomfort during self-collection​	The study notes that the dry swab method is cheap and easy to ship, suggesting cost-effectiveness for large-scale screening​
39	Safety and acceptability of human papillomavirus testing of self-collected specimens: A methodologic study of the impact of collection devices and HPV assays on sensitivity for cervical cancer and high-grade lesions.	Evalyn®Brush: Anyplex™ II HPV28: 209 out of 232 (90.1% positivity rate) Cobas® 4800: 196 out of 232 (84.5% positivity rate) Xpert® HPV: 197 out of 232 (84.9% positivity rate) FLOQSwabs™: Anyplex™ II HPV28: 193 out of 232 (83.2% positivity rate) Cobas® 4800: 185 out of 232 (79.7% positivity rate) Xpert® HPV: 188 out of 232 (81.0% positivity rate)	Sensitivity for CIN3+ Anyplex™ II HPV28: Physician-collected: 95.6% Evalyn®Brush: 94.5% FLOQSwabs™: 87.4% Cobas® 4800: Physician-collected: 94.0% Evalyn®Brush: 90.7% FLOQSwabs™: 86.3% Xpert® HPV: Physician-collected: 94.5% Evalyn®Brush: 91.2% FLOQSwabs™: 87.9% Sensitivity for Invasive Carcinoma Anyplex™ II HPV28: Physician-collected: 93.3% Evalyn®Brush: 91.1% FLOQSwabs™: 86.7% Cobas® 4800: Physic…	not mentioned	88% of participants considered self-collection to be a good alter- native for physician-collection, although 84% of women had more confidence in physicians. Overall, 87% of women reported self-collec- tion to be more convenient than visiting a physician.	not mentioned directly
40	Comparison of detection rate of high risk HPV infection between self-collected HPV testing and clinician-collected HPV testing in cervical cancer screening.	10 %	Not specified but they mentioend this "we found that self-collected HPV DNA testing had a high sensitivity for high grade lesion detection (100%)"	not mentioend	The study implies acceptability by mentioning increased coverage and potential use of self-sampling in populations avoiding clinician collection​	not mentioend
41	Evaluation of satisfaction with three different cervical cancer screening modalities: clinician-collected Pap test vs. HPV test by self-sampling vs. HPV test by urine sampling.	"Because of the low rates of abnormal cytology (3 cases of atypical squamous cells-undetermined significance), we only identified that the detection rate of HPV 16/18 was 2.0% for vaginal self -sampling and 1.5% for urine sampling"	not specified	not mentioned	Higher satisfaction for self-sampling and urine sampling (self-sampling 93.4%, urine sampling 94.4%) compared to Pap test (87.2%)​ Lower psychological distress with self-sampling and urine sampling than with Pap test​	not mentioned
42	Clinical Performance of Self-collected Specimen HPV-DNA vs Clinician- collected Specimen HPV-mRNA to Detect High-risk HPV and High-grade Cervical Lesions and Cancer.	74.7% positive high-risk HPV Positive for 16, 18: 31.4%	Sensitivity of self-sampling: 91.8% (95% CI: 85.4%-96.0%) Sensitivity of Pap smear: 90.2% (95% CI: 83.6%-94.9%)	NPV of self-sampling: 91.9% (95% CI: 85.6%-96.0%) NPV of Pap smear: 91.7% (95% CI: 86.0%-95.7%)	not mentioned	not mentioned
43	HPV testing in first-void urine provides sensitivity for CIN2+ detection comparable with a smear taken by a clinician or a brush-based self-sample: cross-sectional data from a triage population.	For self-sampling: 66 positive using SPF10 59 positive using GP5+/6+ Note: "SPF10 and GP5+/6+ are two types of primers used in polymerase chain reaction (PCR) testing for the detection of human papillomavirus (HPV)."	Sensitivity for CIN2+ detection: For SPF10: 100% (CTS and SS) For GP5+/6+: 95% (all) Specificity for CIN2+ For SPF10: 33% (CTS) and 35% (SS) For GP5+/6+: 39% (CTS) and 43% (SS)	not mentioend	A total of 82 women (90.1%) rated the convenience of the SS compared with CTS as good to excellent, and 81 women (89.0%) rated the urine sampling as good to excellent compared with CTS. Two women rated the convenience of SS com- pared with CTS as poor.	not mentioned
44	Acceptability of self-collected versus provider-collected sampling for HPV DNA testing among women in rural El Salvador	not mentioned	not mentioned	not mentioned	Reasons for self-collection preference included privacy/embarrassment, ease, and less pain; reasons cited for provider-collection preference were result accuracy and provider knowledge/experience.	not mentioned
45	Feasibility of At-Home Self-Sampling for HPV Testing as an Appropriate Screening Strategy for Nonparticipants in Switzerland: Preliminary Results of the DEPIST Study	Not applicable in this study	not mentioned	not mentioned	One hundred six women (82%) preferred the Self-HPV because it is easy to perform, convenient,	not direclty menioned
46	Evaluation of a New APTIMA Specimen Collection and Transportation Kit for High-Risk Human Papillomavirus E6/E7 Messenger RNA in Cervical and Vaginal Samples	not directly mentioned	Cervical Samples: PreservCyt: Sensitivity: 96.6% (95% CI: 82.8–99.4) Specificity: 66.2% (95% CI: 62.1–70.1) Cervical SCT: Sensitivity: 100% (95% CI: 88.7–100) Specificity: 59.8% (95% CI: 55.6–63.8) SurePath: Sensitivity: 93.3% (95% CI: 78.7–98.2) Specificity: 70.9% (95% CI: 66.9–74.5) Vaginal Samples: SCT (self-collected): Sensitivity: 86.7% (95% CI: 70.3–94.7) Specificity: 60.1% (95% CI: 55.9–64…	Cervical Samples: PreservCyt PPV: 13.3% (95% CI: 9.4–18.6) NPV: 99.7% (95% CI: 98.4–100) Cervical SCT: PPV: 12.1% (95% CI: 8.6–16.7) NPV: 100% (95% CI: 98.8–100) SurePath: PPV: 14.9% (95% CI: 10.5–20.7) NPV: 99.5% (95% CI: 98.2–99.9) Vaginal Samples: SCT (self-collected): PPV: 10.7% (95% CI: 7.4–15.3) NPV: 98.8% (95% CI: 96.9–99.5) SCT (physician-collected): PPV: 12.2% (95% CI: 8.3–17.5) NPV: 98.…	A total of 563 women completed the questionnaire, which demonstrated that more patients found the 5 steps in- volved in self-collecting a vaginal sample to be very easy or easy (94.7%Y100%) compared with very difficult or difficult (0%Y5.3%). Only 5.3% reported some difficulty in collecting the sample, and 87.6% reported no discomfort compared with 12.4% who expressed some discomfort during the c…	not mentioned
47	Performance and acceptability of self-collected human papillomavirus testing among women living with HIV	63% of participants had at least one positive HPV test	Sensitivity: 84.6% for self-sampling Specificity: 62.9% for self-sampling	PPV: 62.9% NPV: 84.6%	High acceptability: 79% found self-collection easy, and 90% found it convenient and comfortable. 86% would recommend it to family and friends.	Not provided
48	Self-Collection by Mail to Test for Human Papillomavirus and Sexually Transmitted Infections	12.4% (home-collected samples)	Sensitivity for CIN2+ detection: 100% for both self-home and clinician samples Specificity for CIN2+: 91.1% for self-home samples, 92.2% for clinician samples	PPV: Not explicitly provided NPV: High due to the high sensitivity for CIN2+	96.3% of participants were willing to use self-collection again 93.6% found the instructions easy to understand	Not provided
49	Acceptability and Accuracy of Cervical Cancer Screening Using a Self-Collected Tampon for HPV Messenger-RNA Testing among HIV-Infected Women in South Africa	0.435	Sensitivity: 77.4% for self-sampling Specificity: 77.7% for self-sampling	PPV: Not explicitly provided NPV: Not explicitly provided	High acceptability: Over 90% of women reported no difficulties with self-collection, and 82% were willing to perform tampon collection at home.	Not provided
50	FAM19A4 methylation analysis in self-samples compared with cervical scrapes for detecting cervical (pre)cancer in HPV-positive women	not mentioned	The sensitivity of FAM19A4 methylation in self-samples was slightly lower, and specificity was higher compared to physician-collected cervical scrapes​	--	--	--
51	Equal prevalence of severe cervical dysplasia by HPV self-sampling and by midwife-collected samples for primary HPV screening: a randomized controlled trial	17.1% (95% CI, 16.1–18.23%)	Not explicitly provided in the article, but the non-inferiority of self-sampling suggests comparable sensitivity and specificity to midwife-collected samples.	PPV for detecting severe dysplasia in the self-sampling group was 22.2%, while in the midwife-collected group it was 15.6%. NPV was not explicitly provided.	Participation in the self-sampling group was lower (33.5%) compared to the midwife-collected group (47.5%). High compliance (91.2%) for clinical follow-up among HPV-positive women in the self-sampling group.	The article mentions that self-sampling is cost-effective, time-saving, and convenient, but specific cost-effectiveness data is not provided.	.
52	Detection of CIN2+ by Self-Sampling and HPV Testing: A Randomized Study in Uppsala County	6.3% HPV positive in the first test.	Not directly reported, but the higher detection rate of CIN2+ in the self-sampling group suggests good sensitivity.	Not explicitly provided.	Not discussed in detail	Not provided.
53	Effectiveness of self-sampling human papillomavirus test on precancer detection and screening uptake in Japan: The ACCESS randomized controlled trial	0.7	75% in the intervention group and 92.9% in the control group	PPVs in the intervention group was 38.5% and in the control group was 28.6%.	Not discussed in detail	Not provided
54	Acceptability of Human Papillomavirus Self-Sampling for Cervical Cancer Screening in an Indigenous Community in Guatemala	not mentioned	not explictly provided	not explictly provided	80.2% preferred self sampling, and 79% found self sampling to be more comfortable	.
55	Vaginal Self-Sampling for Human Papillomavirus Infection as a Primary Cervical Cancer Screening Tool in a Haitian Population	.	Sensitivity for detecting ≥CIN-II: 87.5% for vaginal swabs vs. 96.9% for cervical swabs Sensitivity for detecting ≥CIN-I: 89.1% for vaginal swabs vs. 87.9% for cervical swabs	PPV for detecting ≥CIN-II: 8.8% for vaginal swabs vs. 10.6% for cervical swabs	not mentioned	not mentioned
56	Self-sampling to Improve Cervical Cancer Screening Coverage in Switzerland: A Randomised Controlled Trial	23.7% (75 women) were HPV-positive in the self-sampling group .	not reported	not mentioned	not mentioned	not mentioned
57	Performance of OncoE6 Cervical Test with Collection Methods Enabling Self-Sampling	95% sensitivity for detecting HPV 16/18 positive cervical cancer using self-collected lavage samples.	specificity was not calculated as all participants were HPV 16/18 positive.	not mentioned	not mentioned	not mentioned
58	Cervical Human Papillomavirus Testing With Two Home Self-Collection Methods Compared With a Standard Clinically Collected Sampling Method	Tampon method: 15.3% positive (with 27% insufficient samples) Swab method: 15.3% positive	Swab method: Sensitivity 86%, Specificity 94% Tampon method: Sensitivity 77.2%, Specificity 100% (not recommended due to high failure rate)	Not explicitly reported.	The swab method was found to be easier to use and preferred by participants over the tampon method. A larger number of women reported difficulty with the tampon method.	Not assessed in the study.	.
59	Self-collected vaginal sampling for the detection of genital human papillomavirus (HPV) using careHPV among Ghanaian women	Sensitivity of 92.6% for detecting HPV-positive samples.	Sensitivity: The sensitivity of self-collected (SC) samples compared to clinician-collected (CC) samples was 92.6% (95% CI: 85.3–97.0). Sensitivity was higher among HIV-positive women, reaching 95.7% (95% CI: 88.0–99.1) . Specificity: The specificity of SC samples compared to CC samples was 95.9% (95% CI: 89.8–98.9). Specificity was highest among HIV-negative women, reaching 98.6% (95% CI: 92.4–1…	not directly reported.	Over 76% of women found self-sampling easy, and 57.7% preferred it over clinician sampling.	not mentioned
60	Vaginal self-sampling is a cost-effective way to increase participation in a cervical cancer screening programme: a randomised trial	not mentioned	not mentioned	not mentioned	not mentioned	Self-sampling was found to be cost-effective, with an Incremental Cost-Effectiveness Ratio (ICER) of €63.20 per additional screened woman, relative to no intervention.	.
61	Comparison between professional sampling and self-sampling for HPV-based cervical cancer screening among postmenopausal women	Not explicitly provided, focused more on concordance rates	not mentioned	not mentioned	Self-sampling was noted as a potential solution to increase screening participation	not mentioned
62	Pairing community health workers with HPV self-sampling for cervical cancer prevention in rural Haiti	12.7% of analyzed samples were positive for high-risk HPV	not mentioned	not mentioned	96.5% of women were comfortable with self-sampling, and 99.8% stated they would recommend it to others	not mentioned
63	Diagnostic study of human papillomavirus DNA detection in cervical and vaginal samples using the filter paper card	not mentioned	the physician-collected cervical samples on filter paper had a sensitivity of 77.8%, a specificity of 100%. The patient's self-sampling on filter paper had a sensitivity of 66.7%, a specificity of 100%,	The physician collected cervical samples had a a PPV of 100%, and an NPV of 68.4%. a PPV of 100%, and an NPV of 59.1%.	The patients' reactions to self-sampling are given in Table 2. For most of the patients, self-collection was acceptable (100%), not painful (95%), and not embarrassing (95%), but when asked who they would prefer to perform the test, the majority opted for the doctor (95%).	n/a
64	Performance of Xpert HPV on Self-collected Vaginal Samples for Cervical Cancer Screening Among Women in South Africa	Higher in self-collected samples than in clinician-collected samples among HIV-positive women (61.5% vs. 48.2%) and HIV-negative women (25.1% vs. 16.3%).	Sensitivity for CIN2+: HIV-positive: 95.8% in self-collected samples vs. 93.5% in clinician-collected samples HIV-negative: 87.7% in self-collected samples vs. 88.5% in clinician-collected samples Specificity for CIN2+: HIV-positive: 44.0% in self-collected samples vs. 59.7% in clinician-collected samples HIV-negative: 77.5% in self-collected samples vs. 86.9% in clinician-collected samples	not mentioned	Not mentioned in the text provided.	Not discussed in the text provided.	.
65	Non-speculum clinician-taken samples for human papillomavirus testing	might be mentioned, but not clear	The sensitivity of non-speculum samples for detecting CIN2+ was good (83.3%). Among 204 women with negative cytology, the specificity to HPV was 96.4%	not mentioned	Seventy-one percent (n = 120/170) of women preferred a non-speculum sample for their next screen.	not discussed
66	Comparison of self‑collected versus clinician collected cervicovaginal specimens for detection of high risk human papillomavirus among HIV infected women in Ethiopia	The prevalence of high-risk HPV was 29.4% among self-sampled specimen	The sensitivity and specificity of self-sampled HPV test was 84.0% and 88.4%, respectively.	not mentioned	not mentioned	not discussed
		43 mentioned	48 mentioned	28 mentioned	40 mentioned	10 mentioned
		23 not mentioned	18 not mentioned	38 not mentioned	26 not mentioned	56 not mentioned
	Detection Rate	43
	Sensitivity and Specificity	48
	PPV and NPV	28
	Patient satisfaction and acceptability	40
	Cost effectiveness	10

## Sheet: participant population
								300
		300						245
		245						232
		232						1620
		1620						100000
		100000						30
		30						515
		515						209
		209						227
		227						188
		188						1521
		1521						649
		649						600
		600						159
		159						218
		218						63
		63						68
		68						487015
		487015						120
		120						773
		773						203
		203						46
		46						400
		400						1014
		1014						13925
		13925						10027
		10027						208
		208						100
		100						194
		194						171
		171						2049
		2049						722
		722						310
		310						400
		400						732
		732						494
		494						91
		91						518
		518						158
		158						580
		580						70
		70						193
		193						325
		325						450
		450						29604
		29604						17997
		17997						15109
		15109						202
		202						1845
		1845						667
		667						20
		20						174
		174						194
		194						5998
		5998						110
		110						493
		493						42
		42						1121
		1121						83
		83						994
		994
		702785

## Sheet: cost effectiveness
Study ID	Title	Cost effectiveness
1	Accuracy and effectiveness of HPV mRNA testing in cervical cancer screening: a systematic review and meta-analysis	Not mentioned				9	Cost-effectiveness of the screen-and-treat strategies using HPV test linked to thermal ablation for cervical cancer prevention in China: a modeling study.	Compared with current strategies in China (physician-HPV with genotype or cytology triage), all screen-and-treat strategies are cost-effective and self-HPV without triage is optimal with the most incremental quality-adjusted life-years (QALYs) gained (220 to 440) in rural and urban China. Each screen-and-treat strategy based on self-collected samples is cost-saving compared with current strategie…	Ye
2	Detecting cervical precancer and reaching underscreened women by using HPV testing on self samples: updated meta-analyses.	Not mentioned				10	Human papillomavirus (HPV) detection in vaginal self-samples: evaluation of eNat® as an alternative suspension medium to ThinPrep®PreservCyt® for vaginal swabs.	In conclusion, this study demonstrated that vaginal self-sampling is a good alternative to cervical swab if the sample is collected in either ThinPrep ®PreservCyt ® or eNat ®, with the second medium allowing viral inactivation and providing a good strategy to further reduce costs.	ye but under specific circumstances mentioned
3	Performance of BD Onclarity HPV assay on FLOQSwabs vaginal self-samples.	not mentioned				15	(COULD EXCLUDE THIS - RUN IT BY SUPERVISOR) Updated evidence-based recommendations for cervical cancer screening in France	Previous assessments showed cost-effectiveness of organized screening programs
4	HPV Self-sampling in Indigenous Communities: A Scoping Review.	Not mentioned				17	Cost-Effectiveness of Offering Cervical Cancer Screening with HPV Self-Sampling among African-American Women in the Mississippi Delta.	"Standard-of-care screening" strategy reduced cancer risk by 6.4% and was not an efficient strategy; "Choice" was more effective and efficient, reducing lifetime risk of cervical cancer by 14.8% and costing $62,720 per year of life saved (YLS)
5	Accuracy of Human Papillomavirus (HPV) Testing on Urine and Vaginal Self-Samples Compared to Clinician-Collected Cervical Sample in Women Referred to Colposcopy.	Not mentioned				21	Vaginal and Urine Self-sampling Compared to Cervical Sampling for HPV-testing with the Cobas 4800 HPV Test.	In Sweden, the costs of a clinician- and midwife-taken cervical HPV sample is at least €40 (County of Skåne) plus the costs of the HPV analysis. The cost of the self-sampling vaginal devices, logistics and transport (mail) of the sample is less than 1/10th that for a clinician-taken sample. Self-sampling vaginal devices, logistics, and transport: less than 1/10th of the clinician-taken sample​
6	HPV-based Cervical Cancer Screening on Self-samples in the Netherlands: Challenges to Reach Women and Test Performance Questions.	Not mentioned				23	Can Human Papillomavirus DNA Self-sampling be an Acceptable and Reliable Option for Cervical Cancer Screening in Female Sex Workers?	The NPV indicated that HPV DNA self-sampling could potentially be incorporated into conventional screening to lengthen the interval between cervical screening and thus make it more cost- effective
7	A positive HPV test with positive p16/Ki-67 double staining in self-sampled vaginal material is an accurate tool to detect women at risk for cervical cancer.	not mentioned				28	Understanding Patients' Perspectives and Information Needs Following a Positive Home Human Papillomavirus Self-Sampling Kit Result.	High deductible plan is defined as meeting one of these three criteria: (1) individual annual deductible ≥$1350; (2) family annual deductible ≥$2700; (3) specialty visit copayment >$30.
8	Performance of HPV testing, Pap smear and VIA in women attending cervical cancer screening in Kilimanjaro region, Northern Tanzania: a cross-sectional study nested in a cohort.	not mentioned				38	Accuracy of dry vaginal self-sampling for detecting high-risk human papillomavirus infection in cervical cancer screening: a cross-sectional study.	The study notes that the dry swab method is cheap and easy to ship, suggesting cost-effectiveness for large-scale screening​
9	Cost-effectiveness of the screen-and-treat strategies using HPV test linked to thermal ablation for cervical cancer prevention in China: a modeling study.	Self-HPV without triage was the most cost-effective strategy, yielding more QALYs and cost savings compared to current strategies				51	Equal prevalence of severe cervical dysplasia by HPV self-sampling and by midwife-collected samples for primary HPV screening: a randomized controlled trial	The article mentions that self-sampling is cost-effective, time-saving, and convenient, but specific cost-effectiveness data is not provided.
10	Human papillomavirus (HPV) detection in vaginal self-samples: evaluation of eNat® as an alternative suspension medium to ThinPrep®PreservCyt® for vaginal swabs.	The study highlighted the potential cost-effectiveness of using eNat® due to its non-flammable nature and the ability to inactivate infectious agents, making it a suitable alternative to ThinPrep®PreservCyt® in low- and middle-income countries.				60	Vaginal self-sampling is a cost-effective way to increase participation in a cervical cancer screening programme: a randomised trial	Self-sampling was found to be cost-effective, with an Incremental Cost-Effectiveness Ratio (ICER) of €63.20 per additional screened woman, relative to no intervention.
11	Cervical cancer screening using HPV tests on self-samples: attitudes and preferences of women participating in the VALHUDES study.	Not provided in the text
12	Self-sampling with HPV mRNA analyses from vagina and urine compared with cervical samples.	Not detailed in the text				10/66
13	Preference for Human Papillomavirus Self-Collection and Papanicolaou: Survey of Underscreened Women in North Carolina.	Not detailed in the text
14	Self- versus physician-collected samples for the follow-up of human papillomavirus-positive women in sub-Saharan Africa.	Not detailed in the text
15	(COULD EXCLUDE THIS - RUN IT BY SUPERVISOR) Updated evidence-based recommendations for cervical cancer screening in France	Previous assessments showed cost-effectiveness of organized screening programs
16	Women's experience with home-based self-sampling for human papillomavirus testing.	Not detailed in the text
17	Cost-Effectiveness of Offering Cervical Cancer Screening with HPV Self-Sampling among African-American Women in the Mississippi Delta.	"Choice" strategy cost $62,720 per YLS when offered every 5 years, ”Standard-of-care" strategy was not found to be efficient
18	HPV self-sampling as primary screening test in sub-Saharan Africa: implication for a triaging strategy.	Not mentioned
19	A Randomized Comparison of Different Vaginal Self-sampling Devices and Urine for Human Papillomavirus Testing-Predictors 5.1.	Not explicitly provided, but the study notes the importance of cost and simplicity, particularly in low and middle-income countries
20	Accuracy of self-collected human papillomavirus samples from Japanese women with abnormal cervical cytology.	Not mentioned directly
21	Vaginal and Urine Self-sampling Compared to Cervical Sampling for HPV-testing with the Cobas 4800 HPV Test.	Clinician-taken cervical HPV sample: at least €40 plus the cost of HPV analysis Self-sampling vaginal devices, logistics, and transport: less than 1/10th of the clinician-taken sample​
22	High-Risk Types of Human Papilloma Virus DNA Testing in Women with False Negative Cytology.	Not specifically mentioned
23	Can Human Papillomavirus DNA Self-sampling be an Acceptable and Reliable Option for Cervical Cancer Screening in Female Sex Workers?	The NPV indicated that HPV DNA self-sampling could potentially be incorporated into conventional screening to lengthen the interval between cervical screening and thus make it more cost- effective
24	Clinical performance of high-risk HPV testing on self-samples versus clinician samples in routine primary HPV screening in the Netherlands: An observational study.	not mentioned
25	Validity and acceptance of self vs conventional sampling for the analysis of human papillomavirus and Pap smear.	not mentioned
26	Comparison of different strategies for the triage to colposcopy of women tested high-risk HPV positive on self-collected cervicovaginal samples.	not mentioned
27	HPV self-sampling in Japanese women: A feasibility study in a population with limited experience of tampon use.	not mentioned
28	Understanding Patients' Perspectives and Information Needs Following a Positive Home Human Papillomavirus Self-Sampling Kit Result.	High deductible plan is defined as meeting one of these three criteria: (1) individual annual deductible ≥$1350; (2) family annual deductible ≥$2700; (3) specialty visit copayment >$30.
29	High-risk Human Papillomavirus Messenger RNA Testing in Wet and Dry Self-collected Specimens for High-grade Cervical Lesion Detection in Mombasa, Kenya.	not mentioned
30	Reflex cytology for triage of high-risk human papillomavirus positive self-sampled material in cervical cancer screening: a prospective cohort study.	not explicitly mentioned
31	Performance of human papillomavirus testing on self-collected versus clinician-collected samples for the detection of cervical intraepithelial neoplasia of grade 2 or worse: a randomised, paired screen-positive, non-inferiority trial.	not mentioned
32	DNA methylation analysis in self-sampled brush material as a triage test in hrHPV-positive women.	not explicitly mentioned
33	Self-Collected Samples in Cervical Cancer Screening: Results of HPV and Pap Self-Collected Samples Compared to Physician-Obtained Specimens.	/
34	Evaluation of the concordance in HPV type between self- and physician-collected samples using a brush-based device and a PCR-based HPV DNA test in Japanese referred patients with abnormal cytology or HPV infection.	does not provide specific information on cost effectiveness.
35	Comparison between self sampling and provider collected samples for Human Papillomavirus (HPV) Deoxyribonucleic acid (DNA) testing in a Nigerian facility.	Not provided
36	The Role of Self-Collection by Vaginal Lavage for the Detection of HPV and High-Grade Intraepithelial Neoplasia.	Not provided
37	High-risk human papillomavirus detection in self-sampling compared to physician-taken smear in a responder population of the Dutch cervical screening: Results of the VERA study.	Not discussed in the article.
38	Accuracy of dry vaginal self-sampling for detecting high-risk human papillomavirus infection in cervical cancer screening: a cross-sectional study.	The study notes that the dry swab method is cheap and easy to ship, suggesting cost-effectiveness for large-scale screening​
39	Safety and acceptability of human papillomavirus testing of self-collected specimens: A methodologic study of the impact of collection devices and HPV assays on sensitivity for cervical cancer and high-grade lesions.	not mentioned directly
40	Comparison of detection rate of high risk HPV infection between self-collected HPV testing and clinician-collected HPV testing in cervical cancer screening.	not mentioend
41	Evaluation of satisfaction with three different cervical cancer screening modalities: clinician-collected Pap test vs. HPV test by self-sampling vs. HPV test by urine sampling.	not mentioned
42	Clinical Performance of Self-collected Specimen HPV-DNA vs Clinician- collected Specimen HPV-mRNA to Detect High-risk HPV and High-grade Cervical Lesions and Cancer.	not mentioned
43	HPV testing in first-void urine provides sensitivity for CIN2+ detection comparable with a smear taken by a clinician or a brush-based self-sample: cross-sectional data from a triage population.	not mentioned
44	Acceptability of self-collected versus provider-collected sampling for HPV DNA testing among women in rural El Salvador	not mentioned
45	Feasibility of At-Home Self-Sampling for HPV Testing as an Appropriate Screening Strategy for Nonparticipants in Switzerland: Preliminary Results of the DEPIST Study	not direclty menioned
46	Evaluation of a New APTIMA Specimen Collection and Transportation Kit for High-Risk Human Papillomavirus E6/E7 Messenger RNA in Cervical and Vaginal Samples	not mentioned
47	Performance and acceptability of self-collected human papillomavirus testing among women living with HIV	Not provided
48	Self-Collection by Mail to Test for Human Papillomavirus and Sexually Transmitted Infections	Not provided
49	Acceptability and Accuracy of Cervical Cancer Screening Using a Self-Collected Tampon for HPV Messenger-RNA Testing among HIV-Infected Women in South Africa	Not provided
50	FAM19A4 methylation analysis in self-samples compared with cervical scrapes for detecting cervical (pre)cancer in HPV-positive women	--
51	Equal prevalence of severe cervical dysplasia by HPV self-sampling and by midwife-collected samples for primary HPV screening: a randomized controlled trial	The article mentions that self-sampling is cost-effective, time-saving, and convenient, but specific cost-effectiveness data is not provided.
52	Detection of CIN2+ by Self-Sampling and HPV Testing: A Randomized Study in Uppsala County	Not provided.
53	Effectiveness of self-sampling human papillomavirus test on precancer detection and screening uptake in Japan: The ACCESS randomized controlled trial	Not provided
54	Acceptability of Human Papillomavirus Self-Sampling for Cervical Cancer Screening in an Indigenous Community in Guatemala
55	Vaginal Self-Sampling for Human Papillomavirus Infection as a Primary Cervical Cancer Screening Tool in a Haitian Population	not mentioned
56	Self-sampling to Improve Cervical Cancer Screening Coverage in Switzerland: A Randomised Controlled Trial	not mentioned
57	Performance of OncoE6 Cervical Test with Collection Methods Enabling Self-Sampling	not mentioned
58	Cervical Human Papillomavirus Testing With Two Home Self-Collection Methods Compared With a Standard Clinically Collected Sampling Method	Not assessed in the study.
59	Self-collected vaginal sampling for the detection of genital human papillomavirus (HPV) using careHPV among Ghanaian women	not mentioned
60	Vaginal self-sampling is a cost-effective way to increase participation in a cervical cancer screening programme: a randomised trial	Self-sampling was found to be cost-effective, with an Incremental Cost-Effectiveness Ratio (ICER) of €63.20 per additional screened woman, relative to no intervention.
61	Comparison between professional sampling and self-sampling for HPV-based cervical cancer screening among postmenopausal women	not mentioned
62	Pairing community health workers with HPV self-sampling for cervical cancer prevention in rural Haiti	not mentioned
63	Diagnostic study of human papillomavirus DNA detection in cervical and vaginal samples using the filter paper card	n/a
64	Performance of Xpert HPV on Self-collected Vaginal Samples for Cervical Cancer Screening Among Women in South Africa	Not discussed in the text provided.
65	Non-speculum clinician-taken samples for human papillomavirus testing	not discussed
66	Comparison of self‑collected versus clinician collected cervicovaginal specimens for detection of high risk human papillomavirus among HIV infected women in Ethiopia	not discussed
